# Supplementary material for: The ZIKV NS5 Protein Aberrantly Alters the Tubulin Cytoskeleton, Induces the Accumulation of Autophagic p62 and Affects IFN Production: HDAC6 Has Emerged as an Anti-NS5/ZIKV Factor
Source: MDPI journal article supplement (doi:10.3390/cells13070598), 2024-03-29

**Figure S1A.** Western-blot replicates associated with Figure 1A.

***Replicate 1 as figure format***

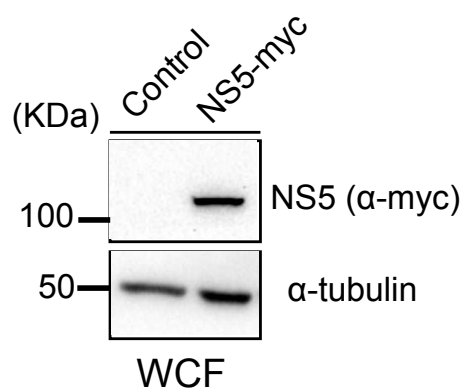

***Replicate 2 as figure format***

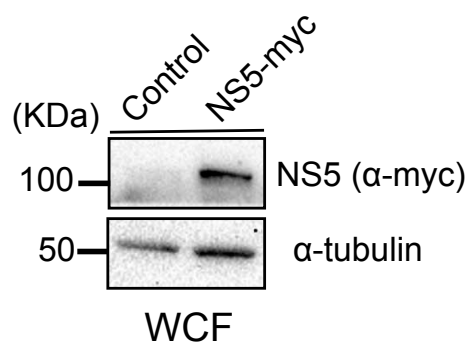

**Figure S1A.** Replicate 1 myc Total Lysate complete gel

Western-blot associated with  
Figure 1A  
Pérez-Yanes, S., et al.

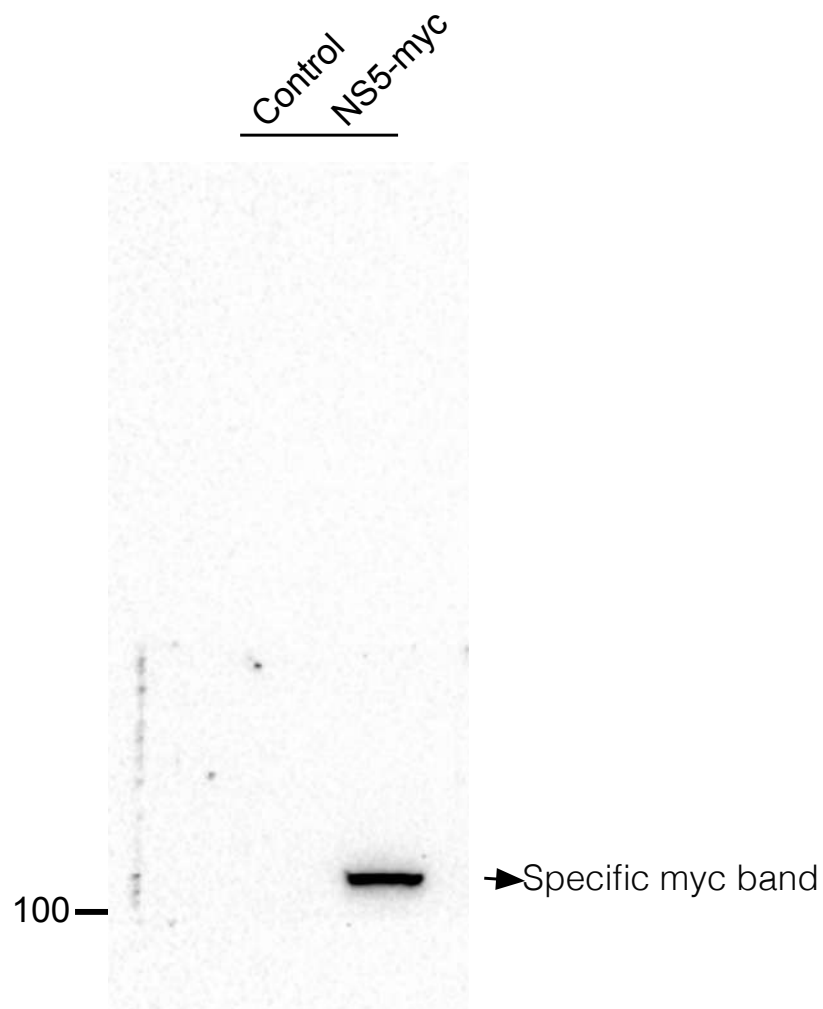

**Figure S1A.** Replicate 1 Total  $\alpha$ -Tubulin  
Total Lysate complete gel

Western-blot associated  
with Figure 1A  
Pérez-Yanes, S., et al.

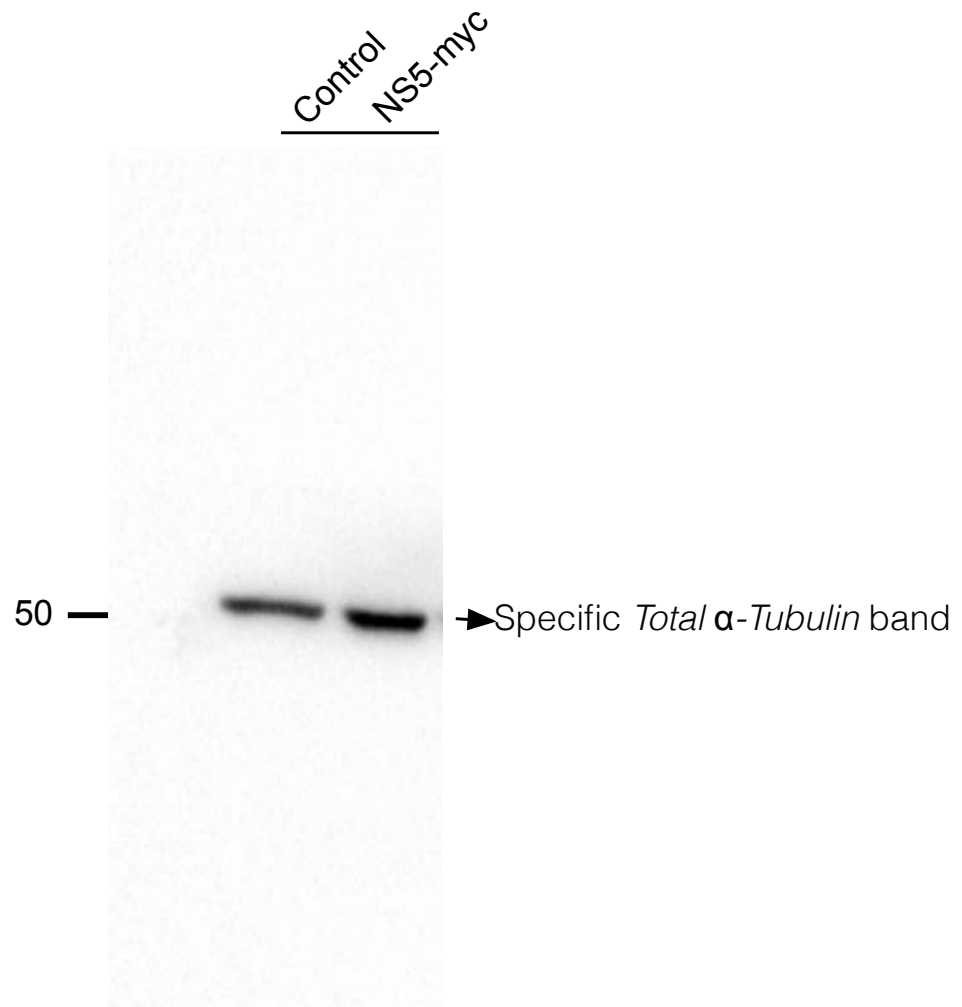

**Figure S1A.** Replicate 2 myc Total Lysate complete gel

Western-blot associated with  
Figure 1A  
Pérez-Yanes, S., et al.

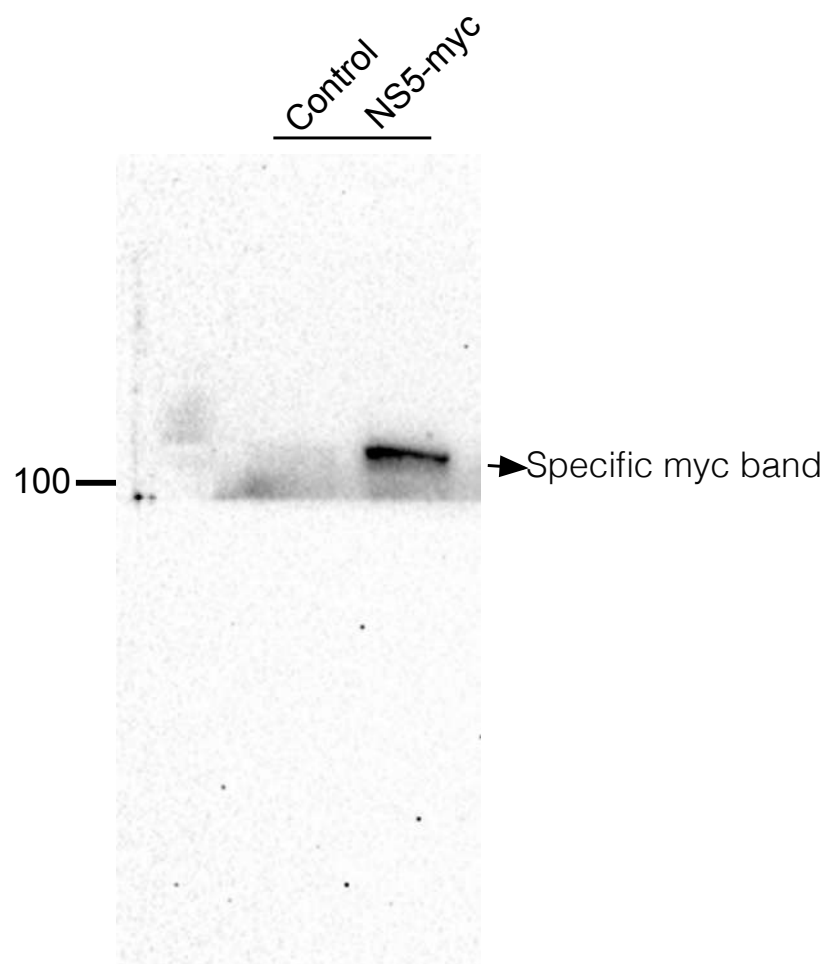

**Figure S1A.** Replicate 2 Total  $\alpha$ -Tubulin  
Total Lysate complete gel

Western-blot associated  
with Figure 1A  
Pérez-Yanes, S., et al.

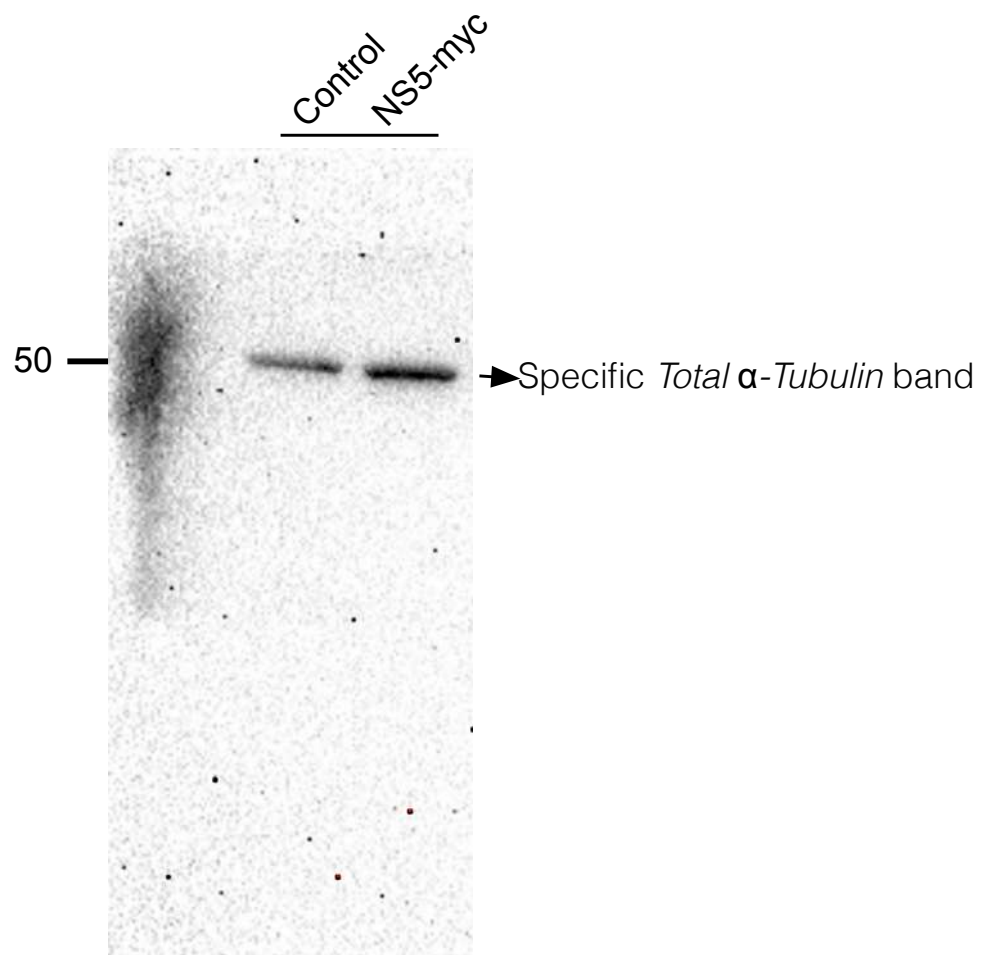

**Figure S1B.** Western-blot replicates associated with Figure 1B.

***Replicate 1 as figure format***

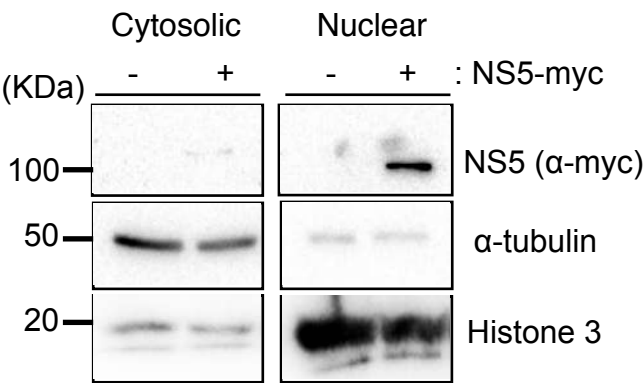

***Replicate 2 as figure format***

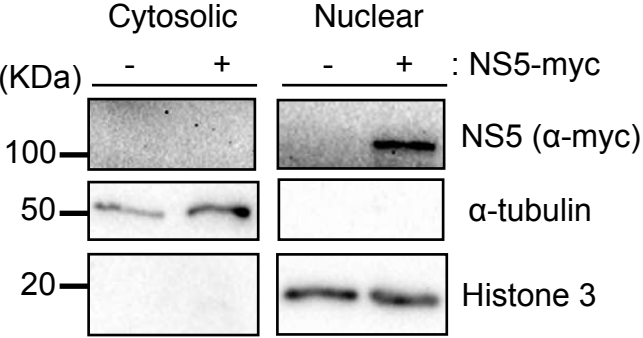

**Figure S1B.** Replicate 1 Histone 3 Fraction complete gel

Western-blot associated with Figure 1B  
Pérez-Yanes, S., et al.

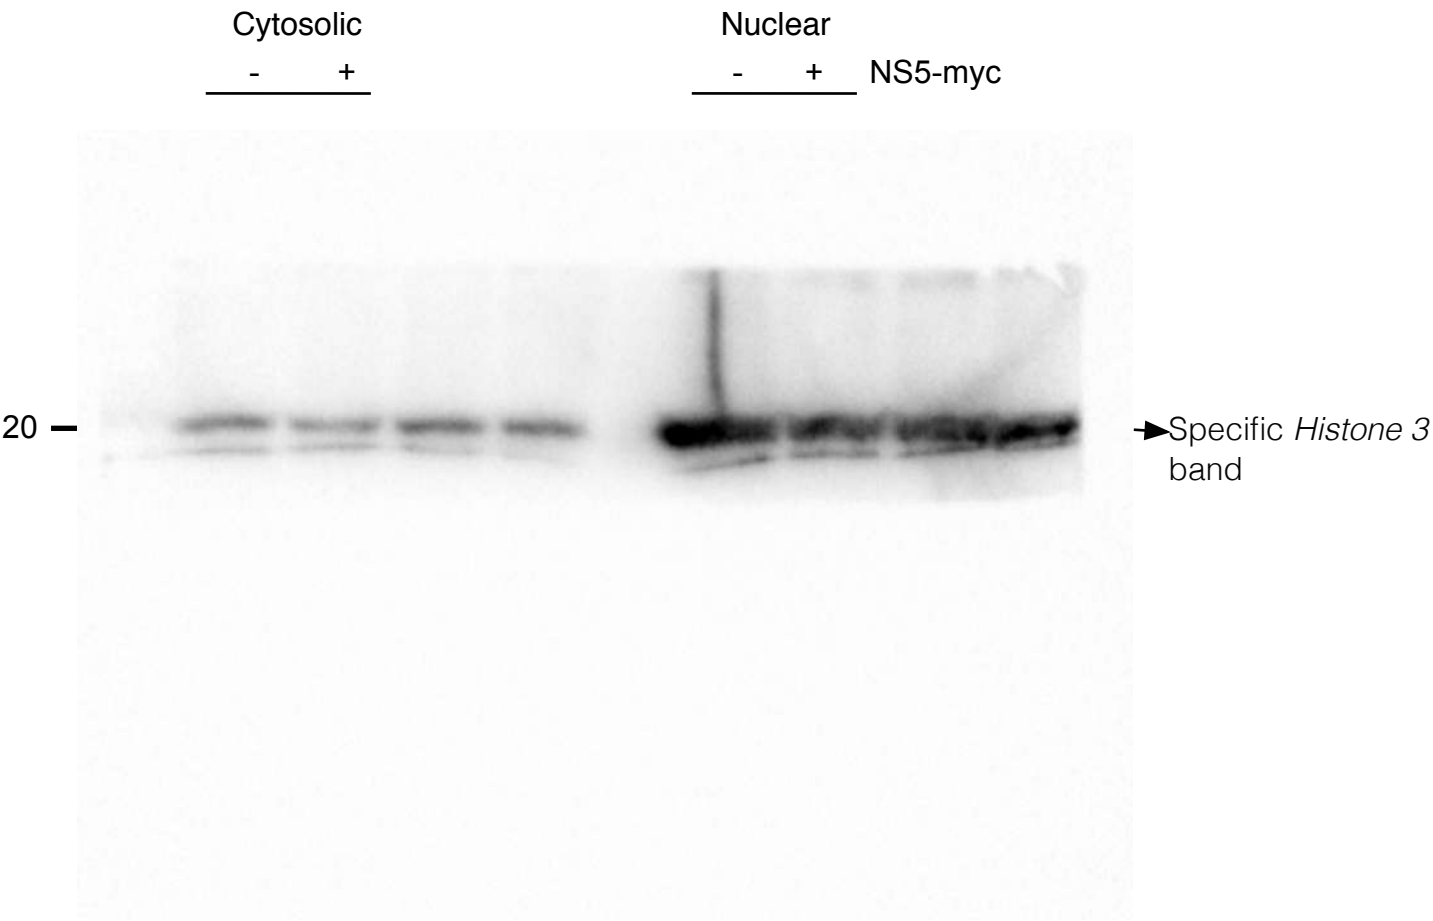

**Figure S1B.** Replicate 1 myc Fraction complete gel

Western-blot associated with Figure 1B  
Pérez-Yanes, S., et al.

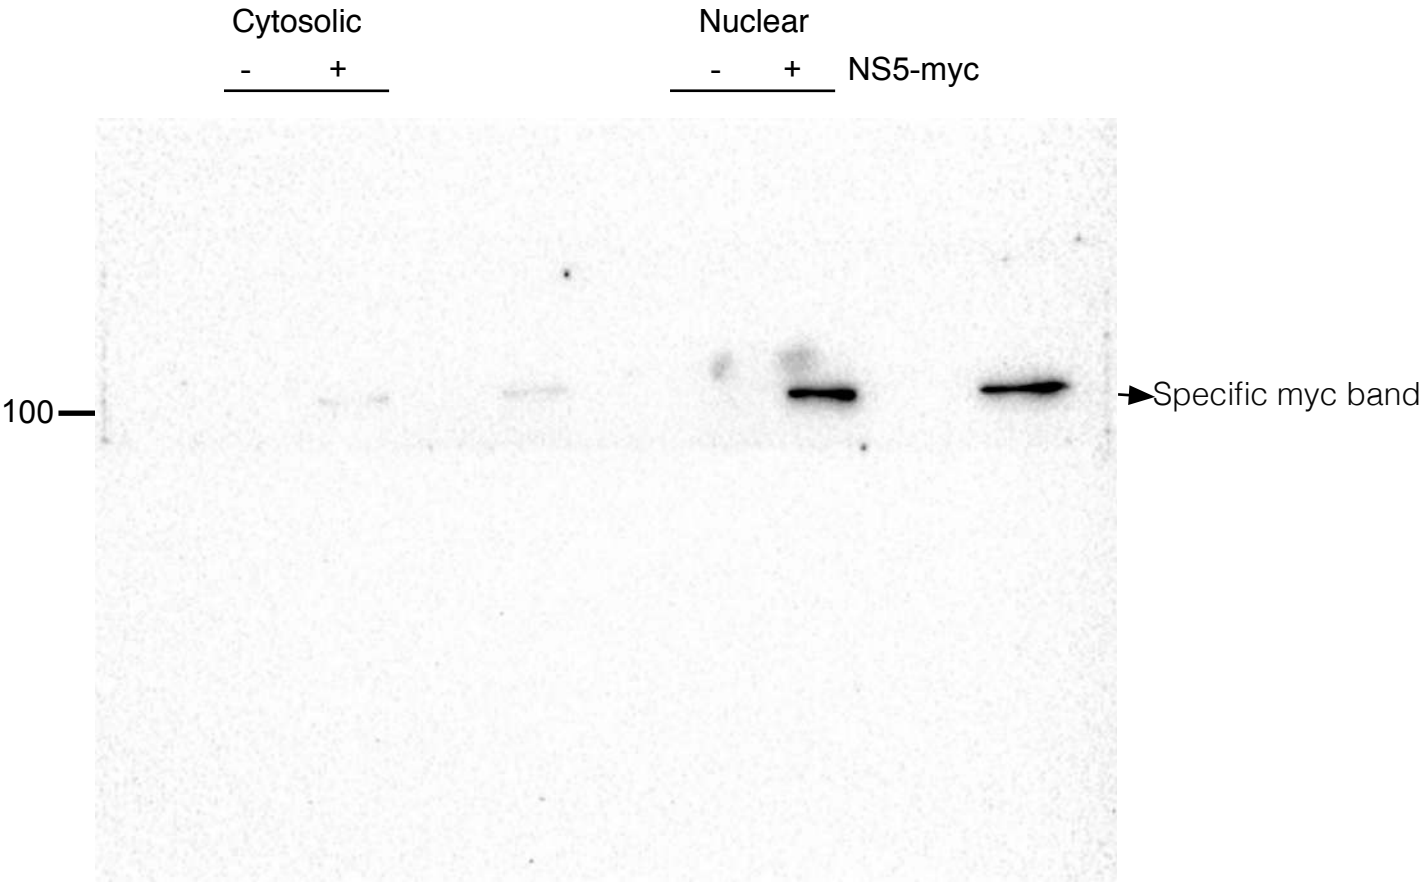



**Figure S1B.** Replicate 1 Total  $\alpha$ -Tubulin  
Fraction complete gel

Western-blot associated  
with Figure 1B  
Pérez-Yanes, S., et al.

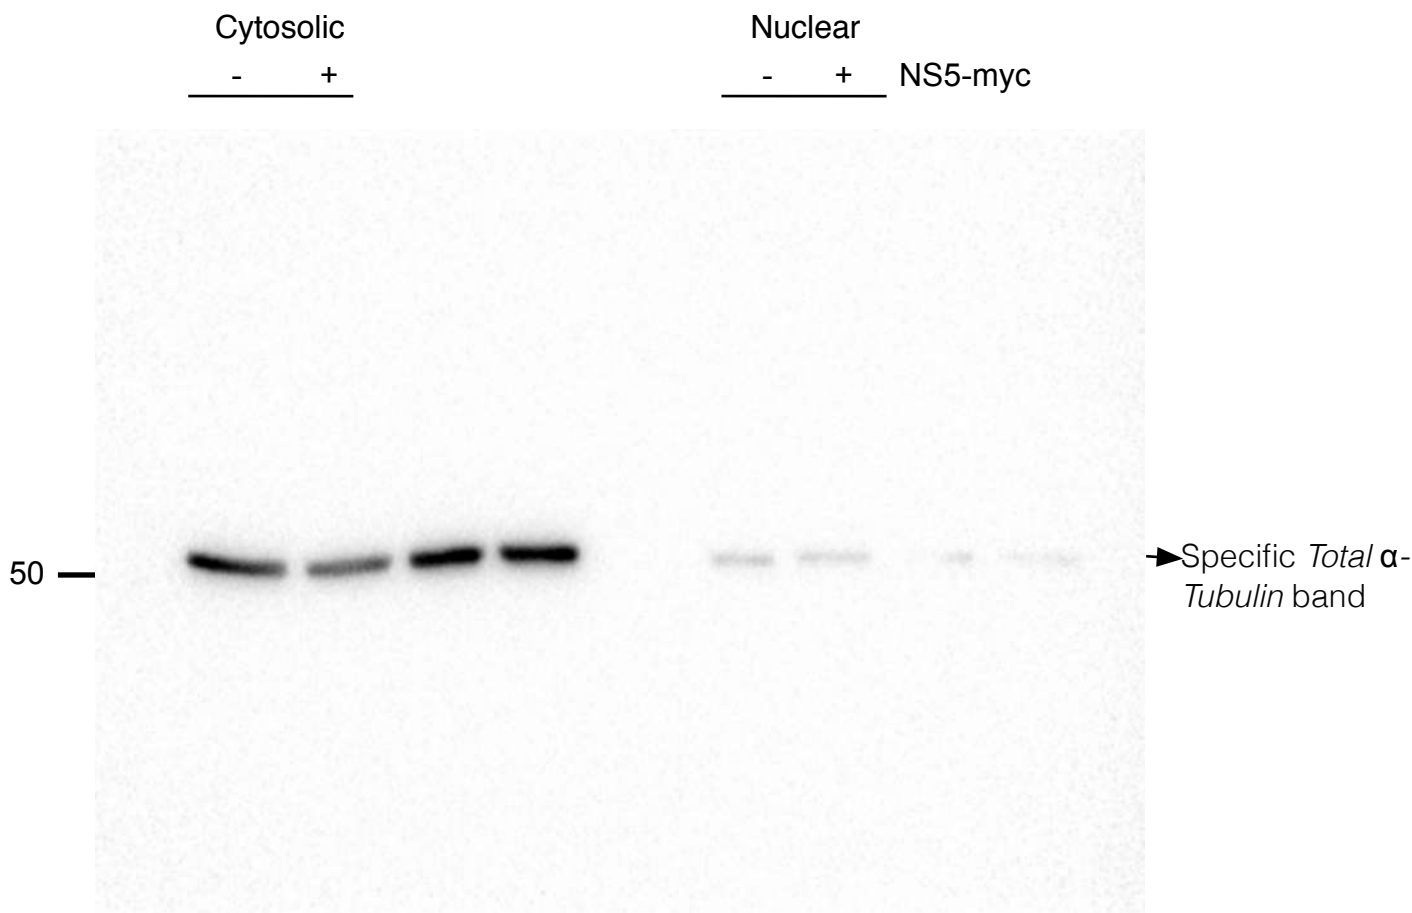

**Figure S1B.** Replicate 2 Histone 3 Fraction complete gel

Western-blot associated with Figure 1B  
Pérez-Yanes, S., et al.

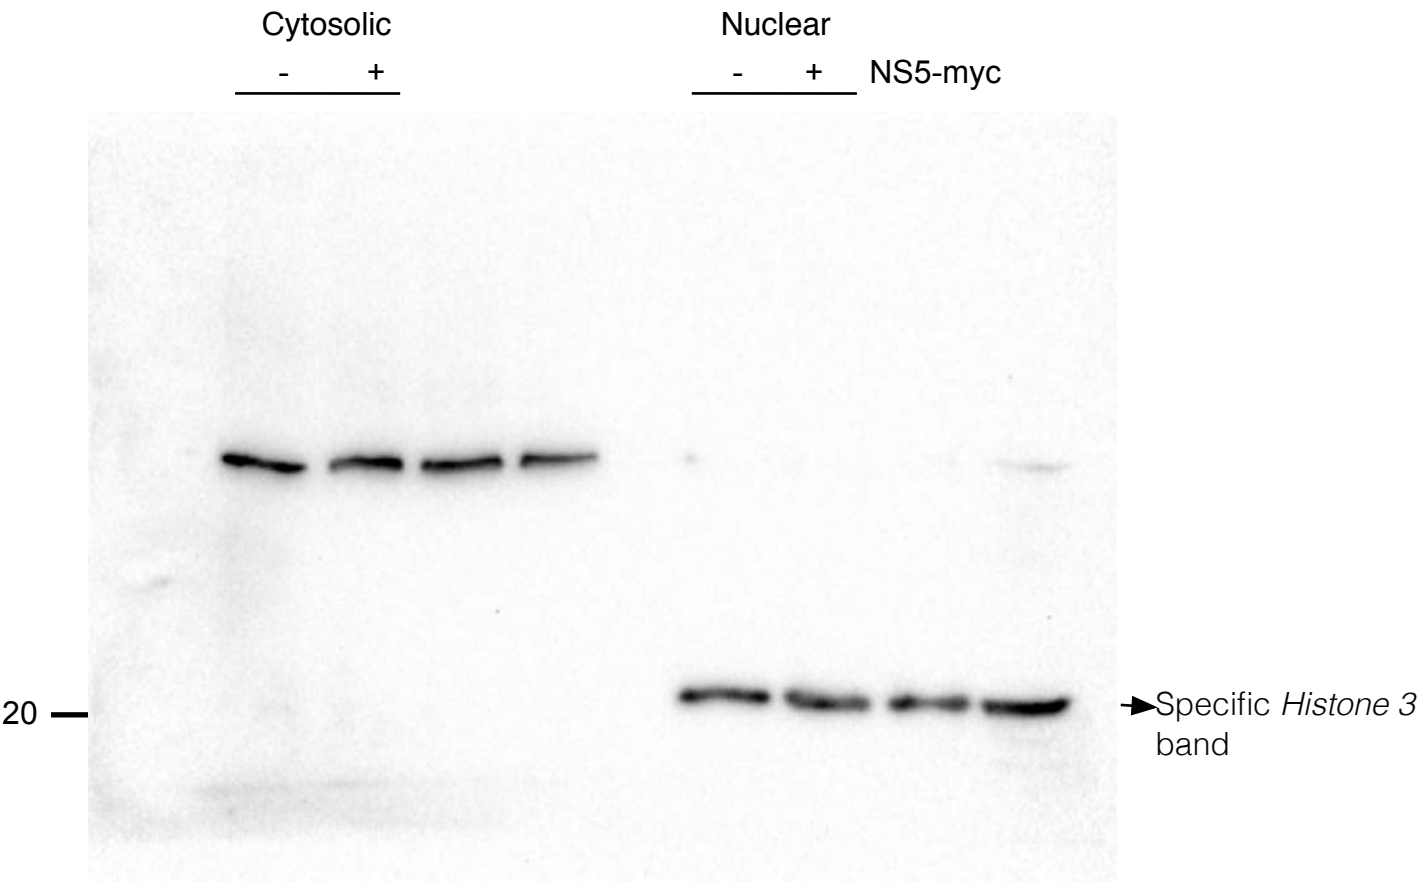

**Figure S1B.** Replicate 2 myc Fraction complete gel

Western-blot associated with Figure 1B  
Pérez-Yanes, S., et al.

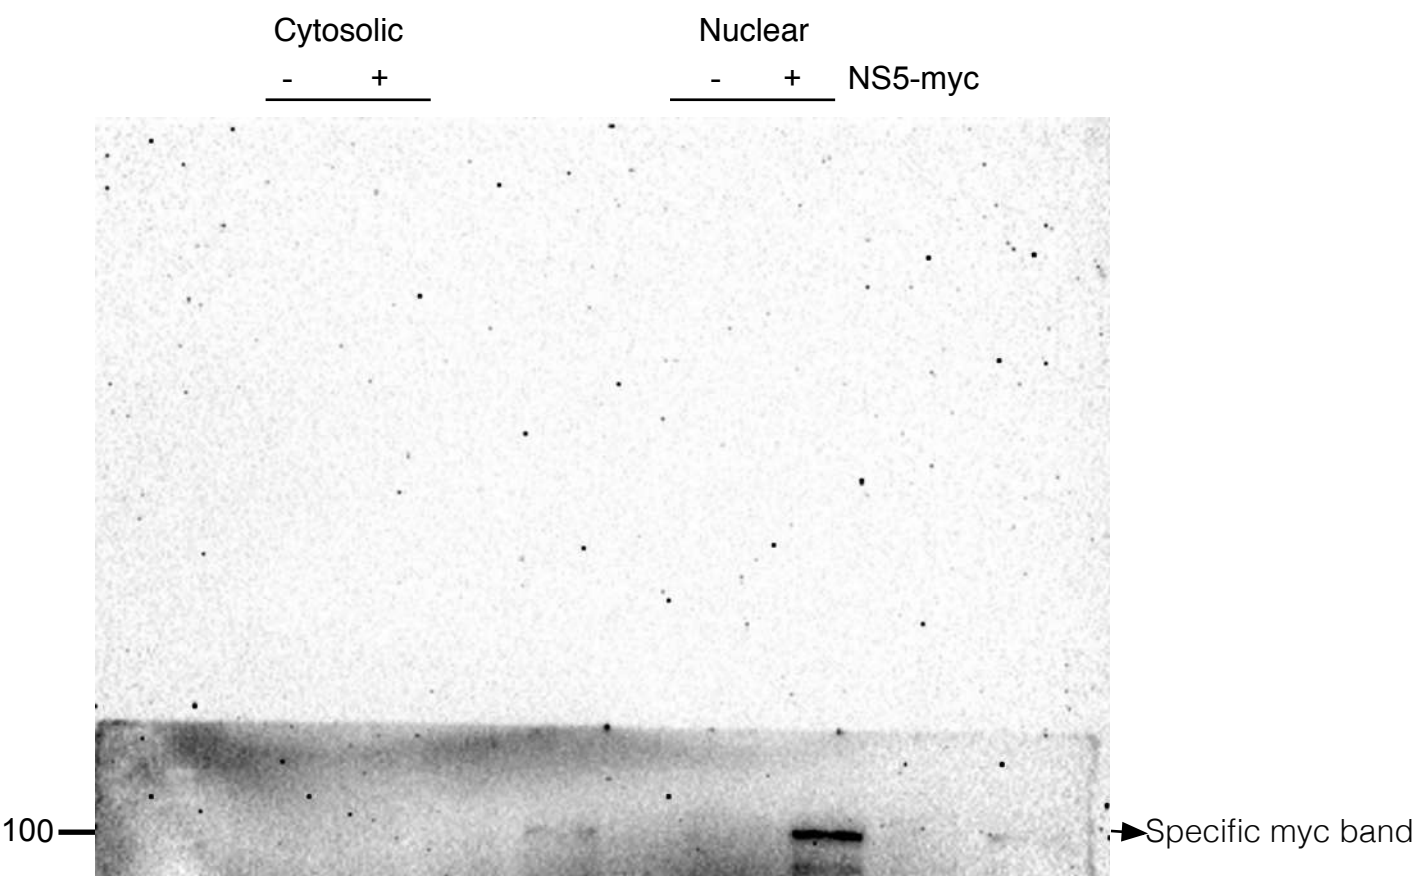

**Figure S1B.** Replicate 2 Total  $\alpha$ -Tubulin  
Fraction complete gel

Western-blot associated  
with Figure 1B  
Pérez-Yanes, S., et al.

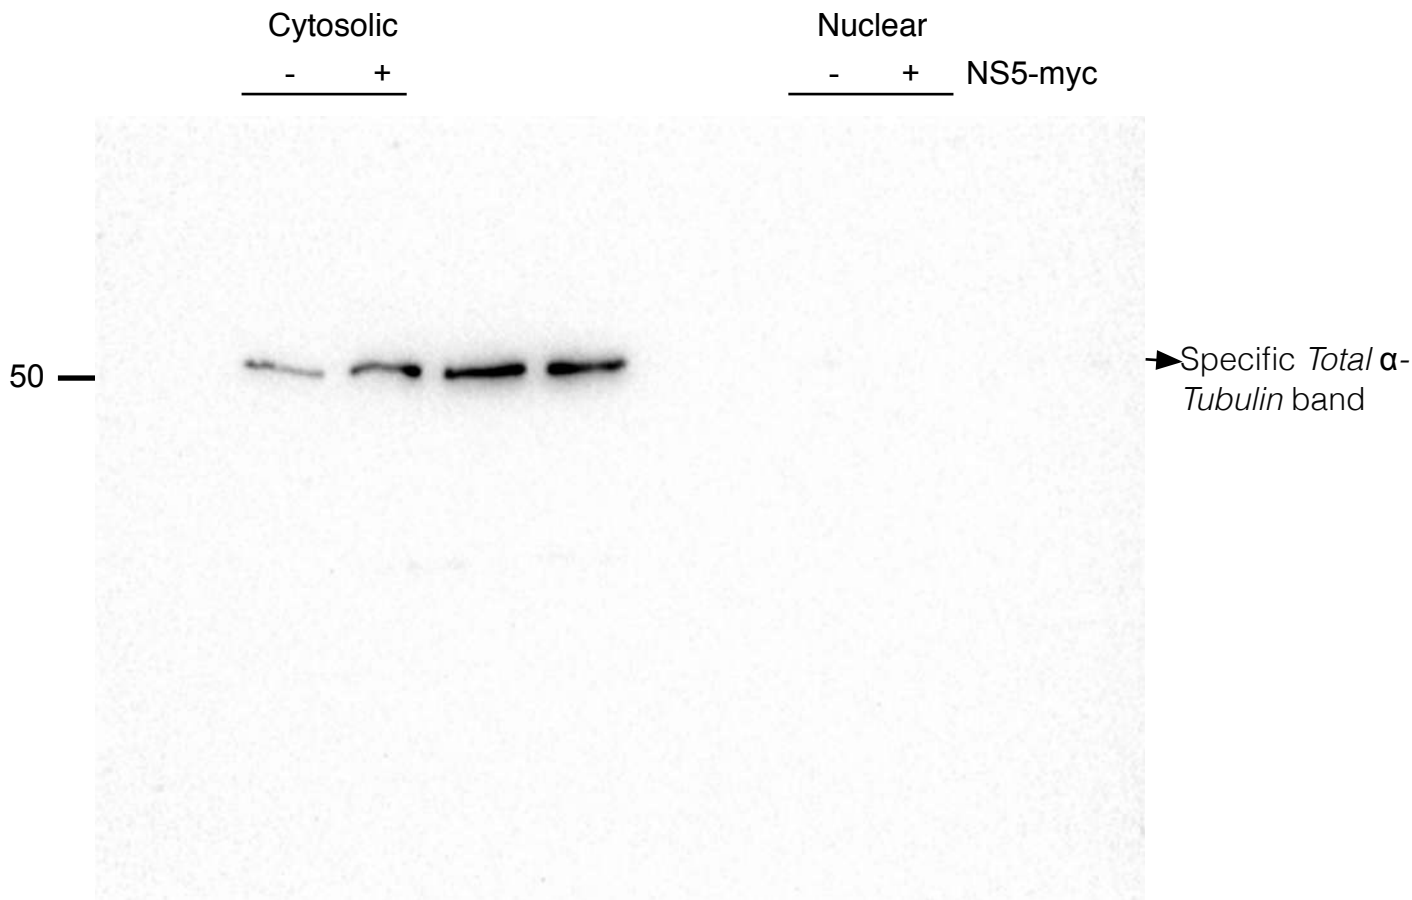

**Figure S2C.** Western-blot replicates associated with Figure 2C.

**Replicate 1 as figure format**

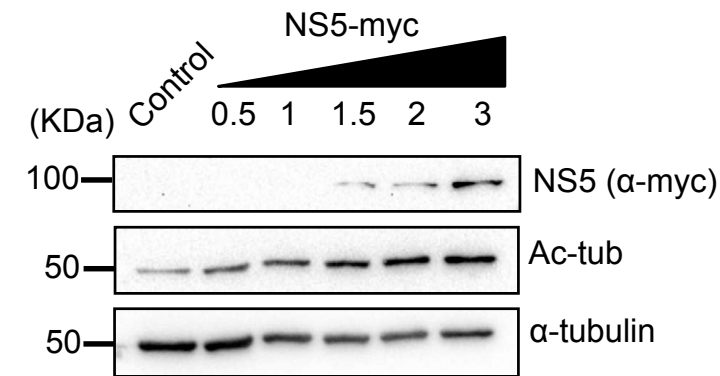

**Replicate 2 as figure format**

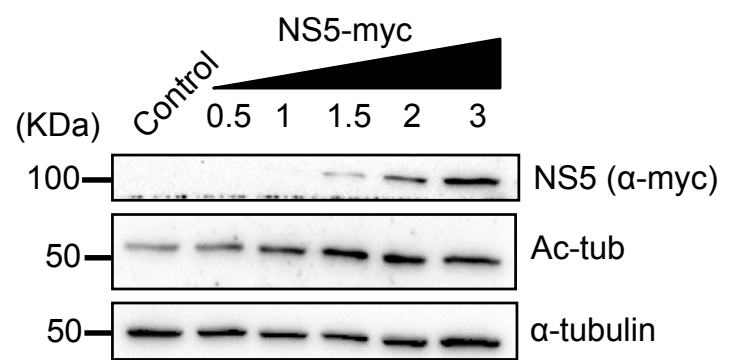

**Replicate 3 as figure format**

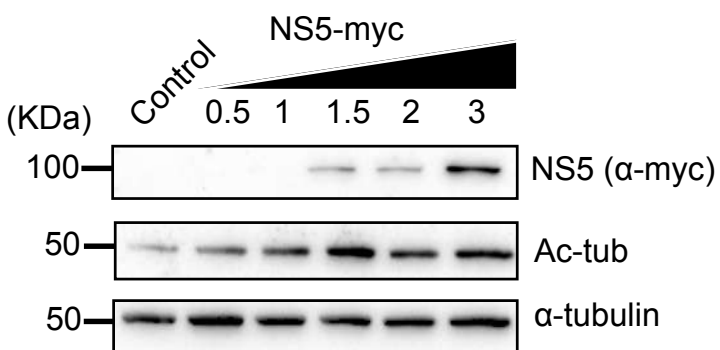

**Replicate 4 as figure format**

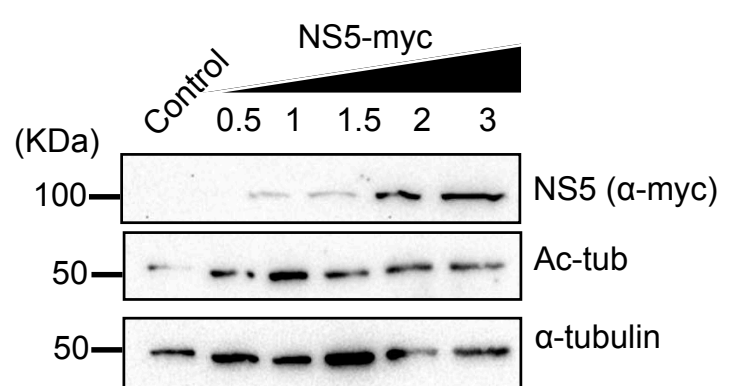

**Replicate 5 as figure format**

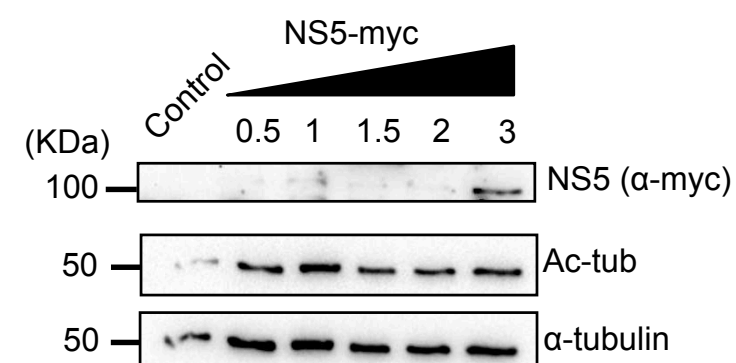

**Replicate 6 as figure format**

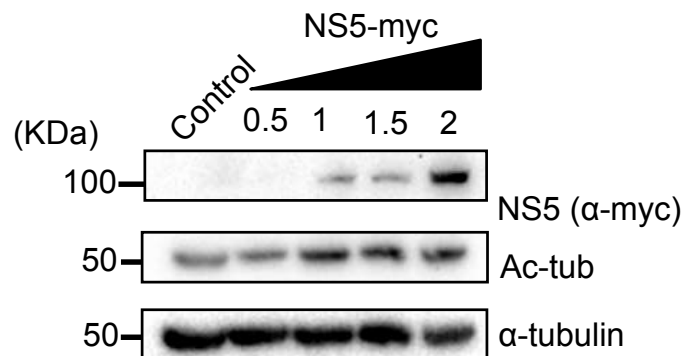

**Replicate 7 as figure format**

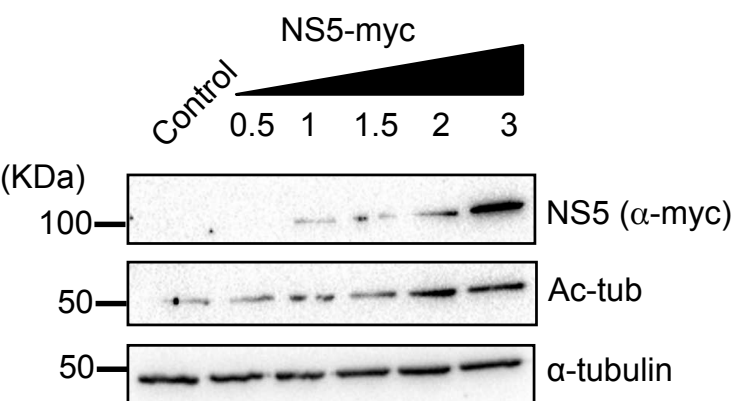

**Replicate 8 as figure format**

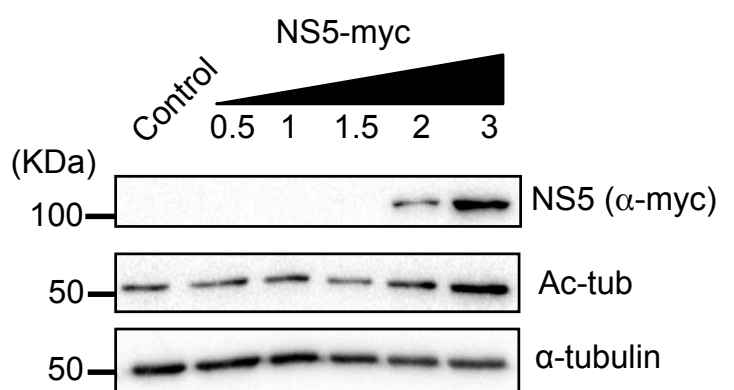

**Figure S2C.** Western-blot replicates associated with Figure 2C.

***Replicate 9 as figure format***

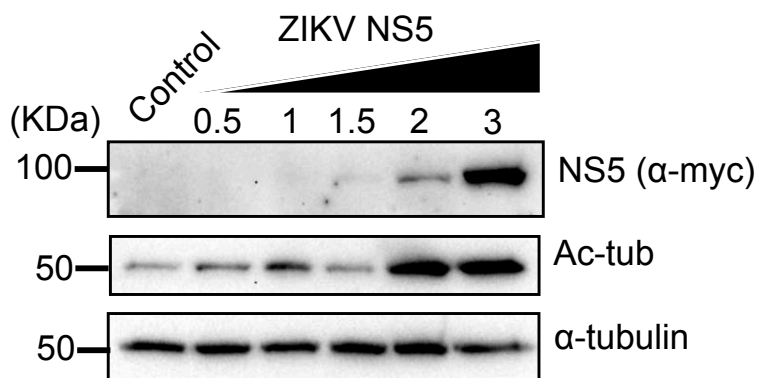

**Figure S2C.** Replicate 1 myc complete gel

Western-blot associated with  
Figure S2C  
Pérez-Yanes, S., et al.

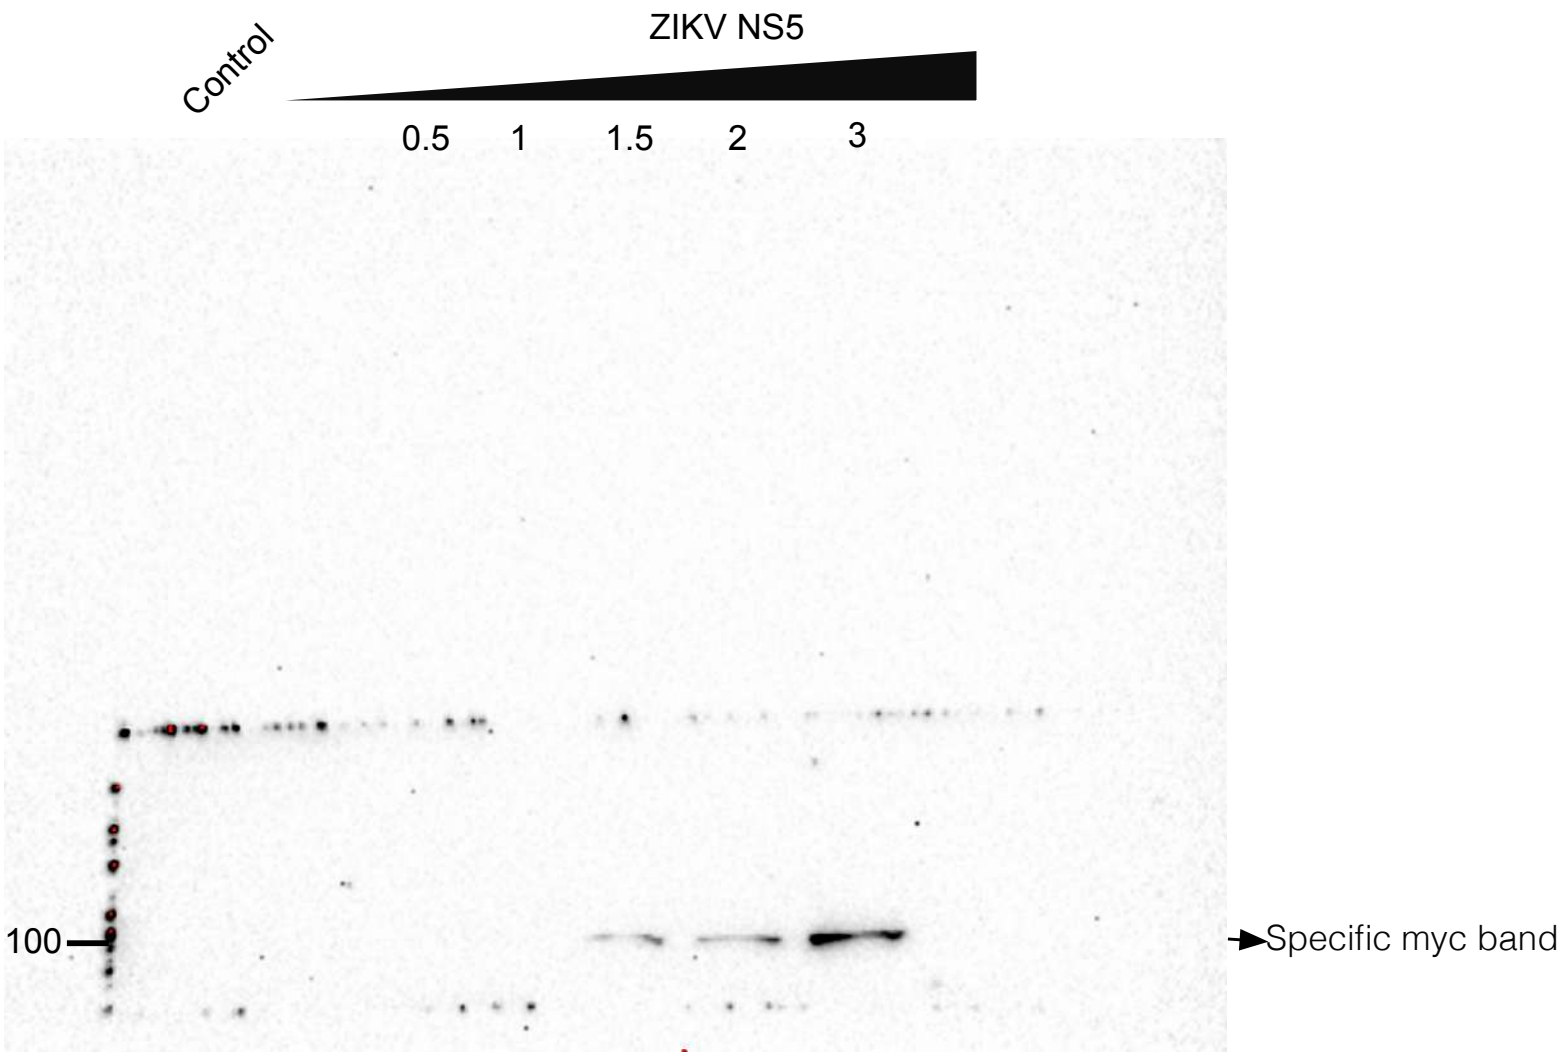

**Figure S2C.** Replicate 1 Total  $\alpha$ -Tubulin complete gel

Western-blot associated with Figure 2C  
Pérez-Yanes, S., et al.

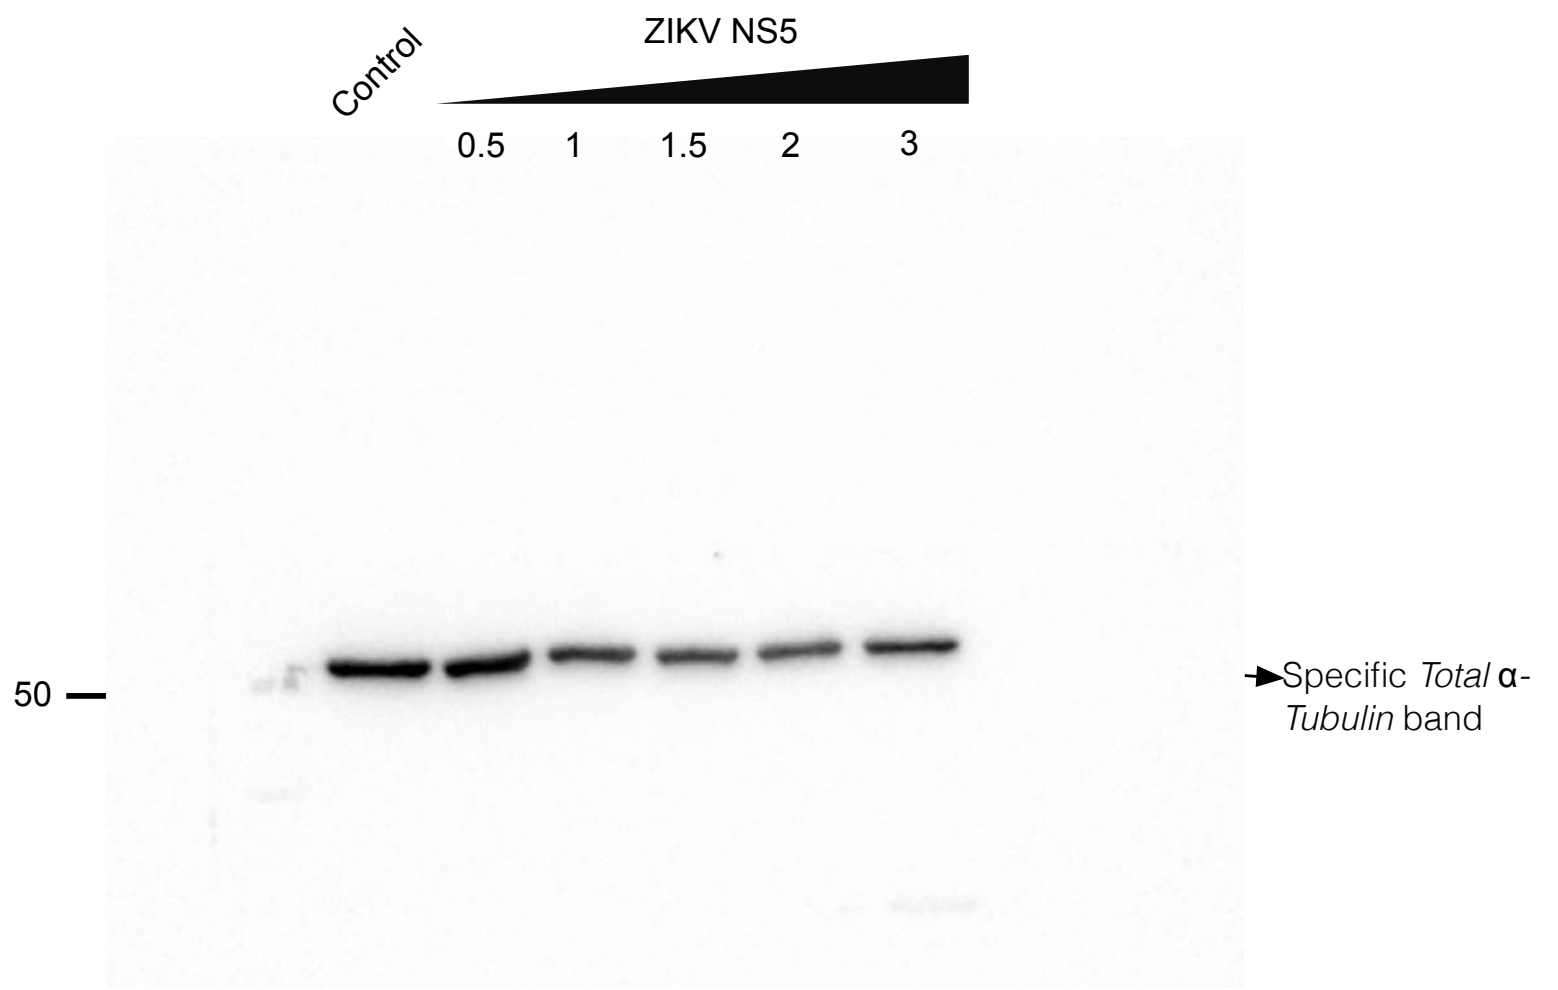



**Figure S2C.** *Replicate 1 Acetylated  $\alpha$ -Tubulin complete gel* Western-blot associated with Figure S2C  
*Pérez-Yanes, S., et al.*

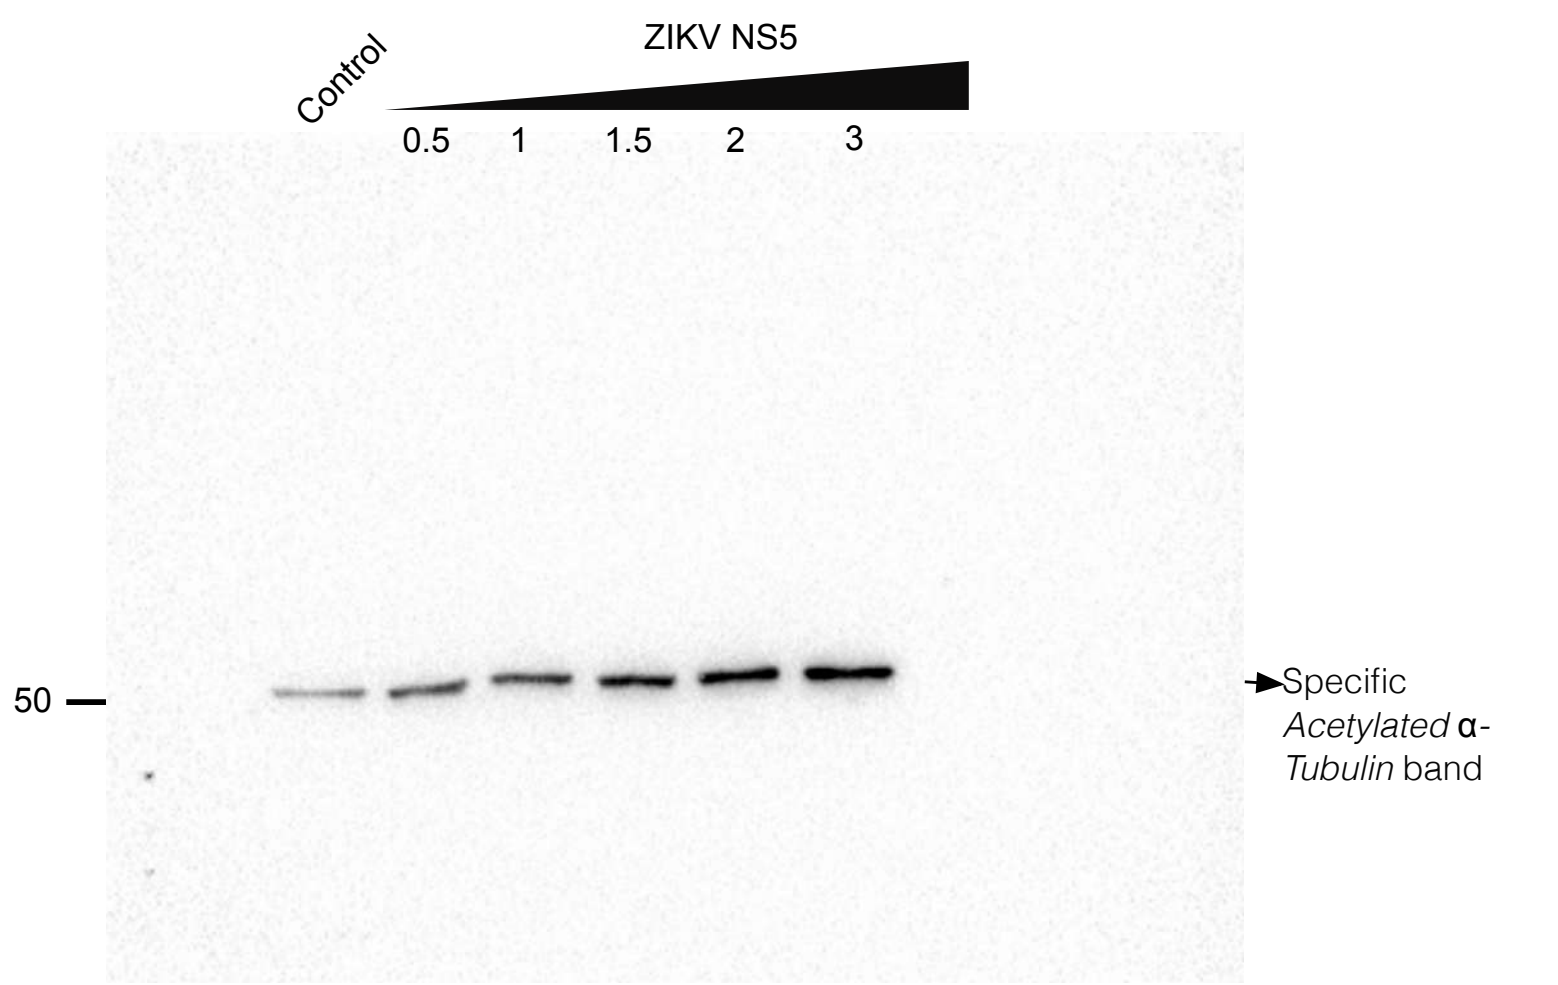

**Figure S2C.** Replicate 2 myc complete gel

Western-blot associated with  
Figure S2C  
Pérez-Yanes, S., et al.

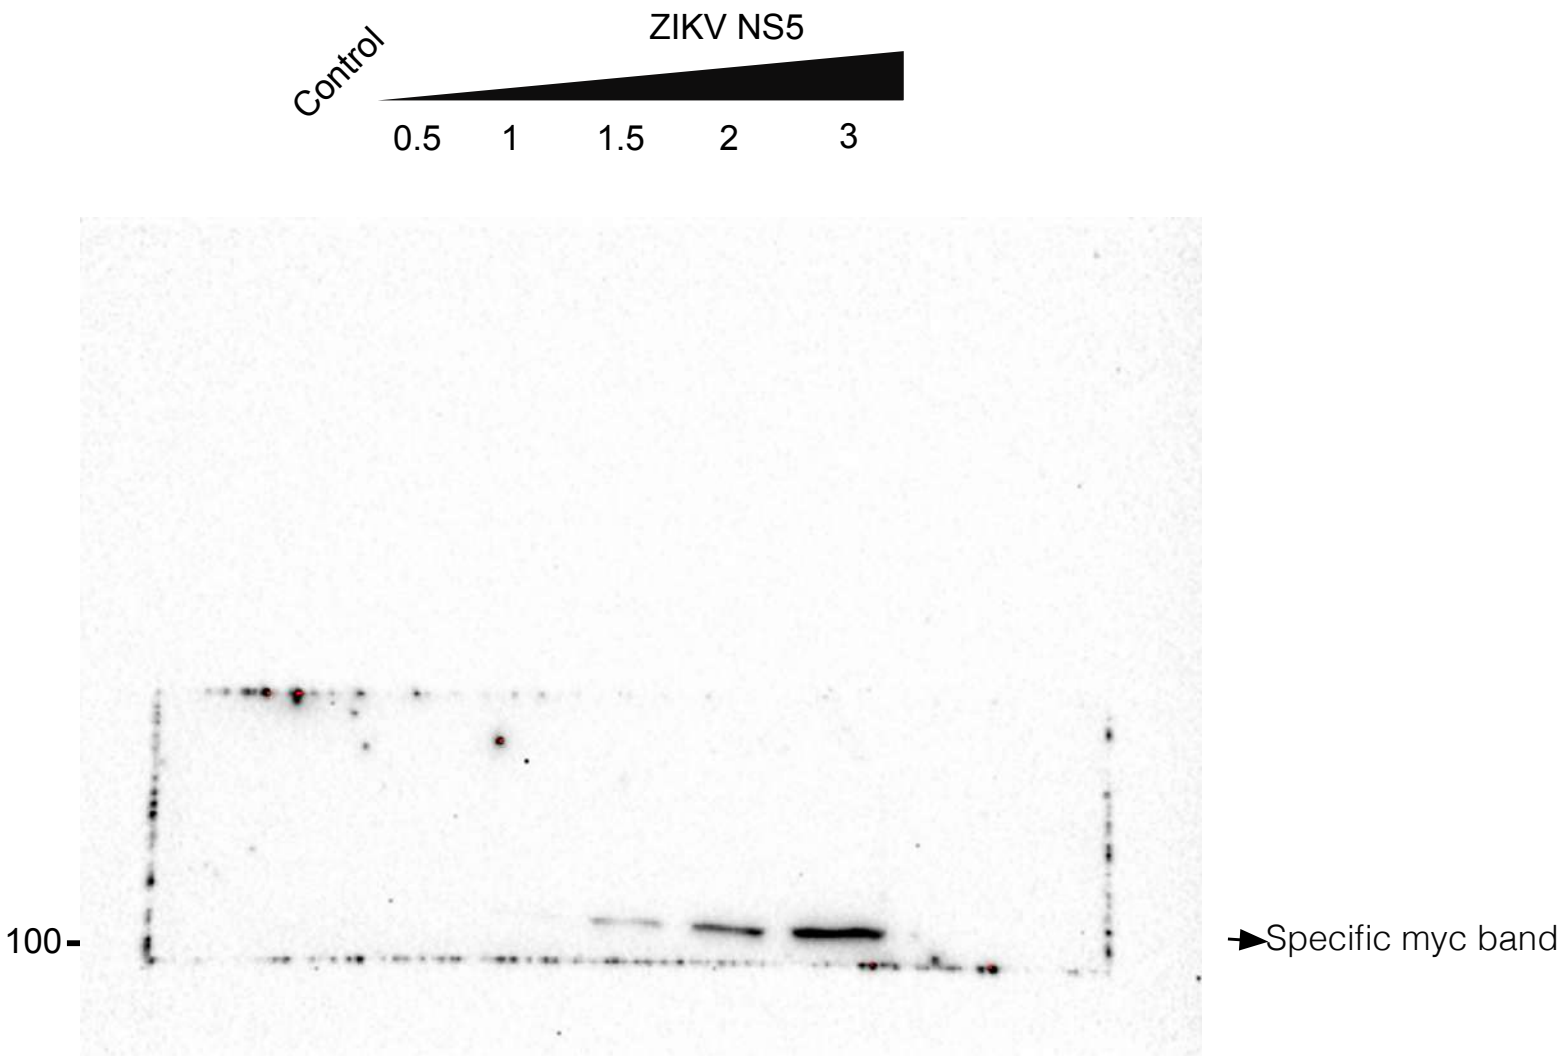

**Figure S2C.** Replicate 2 Total  $\alpha$ -Tubulin complete gel

Western-blot associated with Figure 2C  
Pérez-Yanes, S., et al.

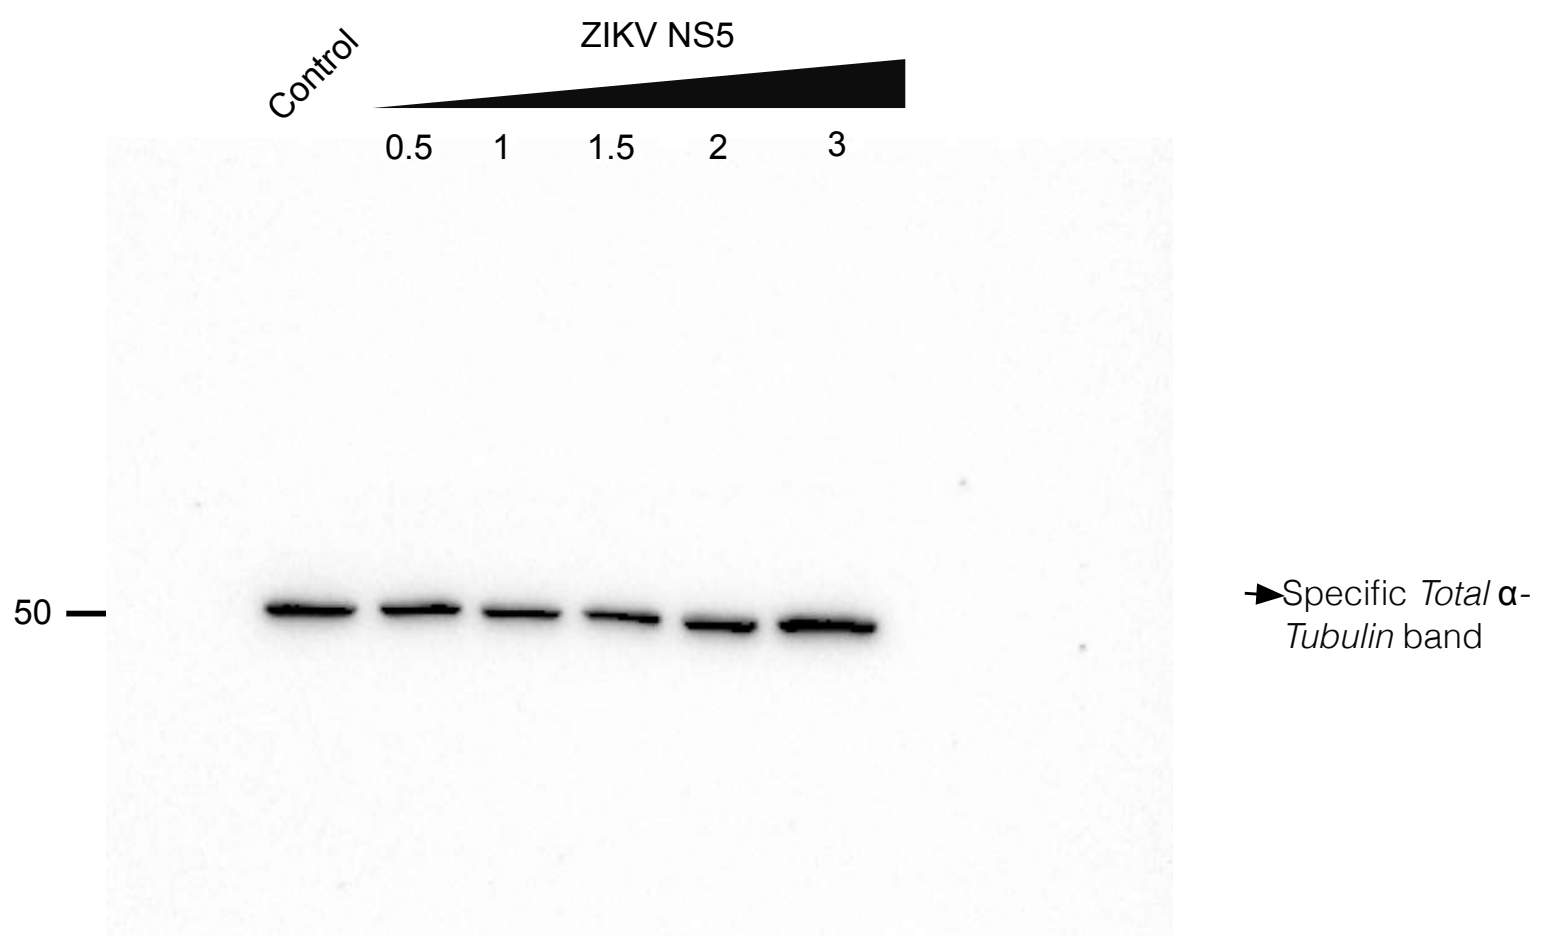

**Figure S2C.** Replicate 2 Acetylated  $\alpha$ -Tubulin complete gel Western-blot associated with Figure S2C  
Pérez-Yanes, S., et al.

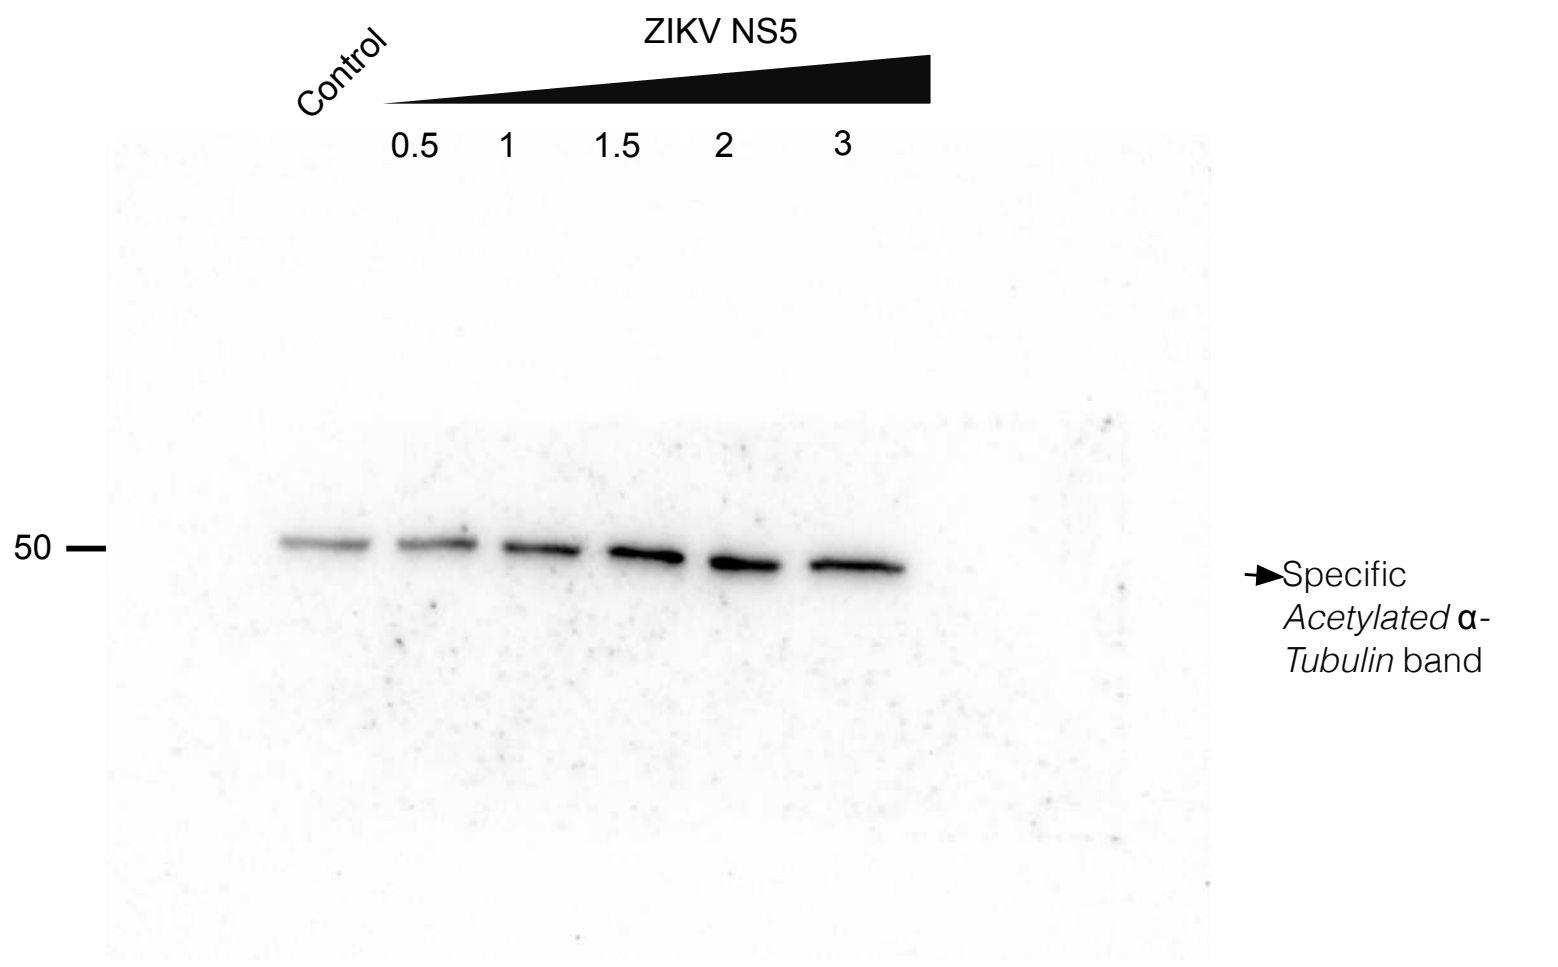

**Figure S2C.** Replicate 3 myc complete gel

Western-blot associated with  
Figure S2C  
Pérez-Yanes, S., et al.

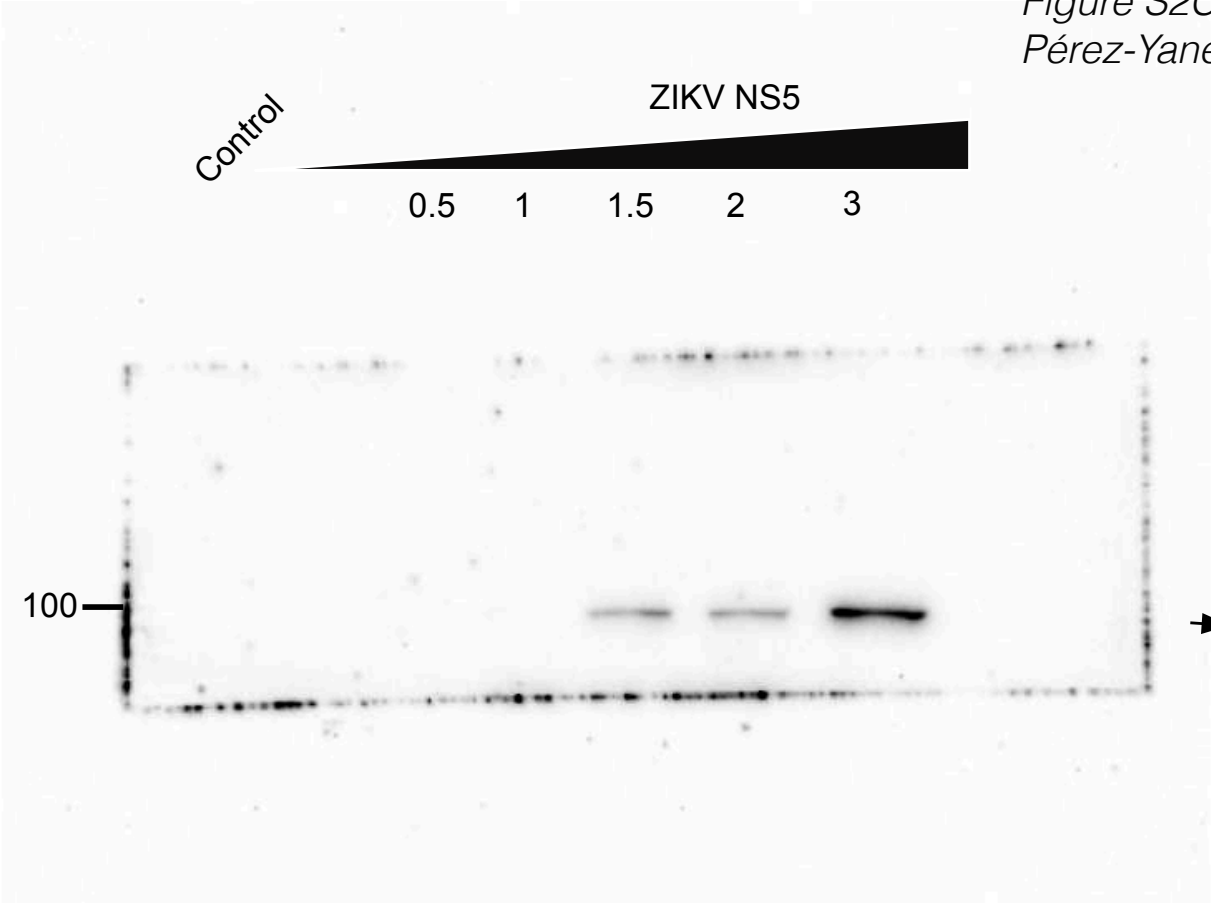

**Figure S2C.** Replicate 3 Total  $\alpha$ -Tubulin complete gel

Western-blot associated  
with Figure 2C  
Pérez-Yanes, S., et al.

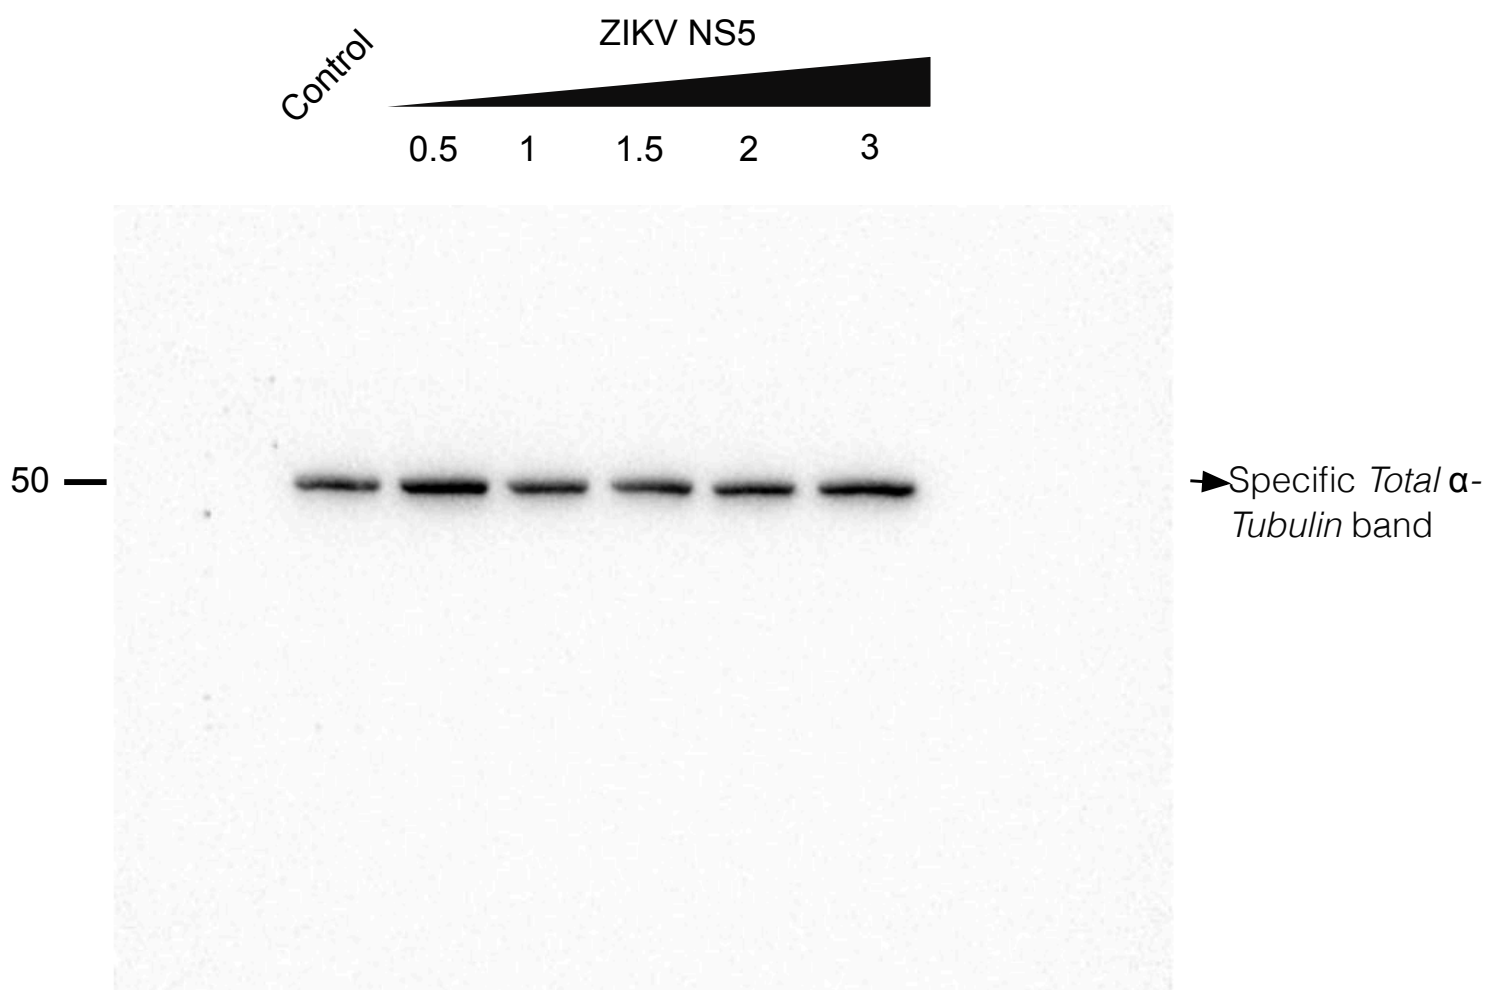

**Figure S2C.** Replicate 3 Acetylated  $\alpha$ -Tubulin complete gel Western-blot associated with Figure S2C  
Pérez-Yanes, S., et al.

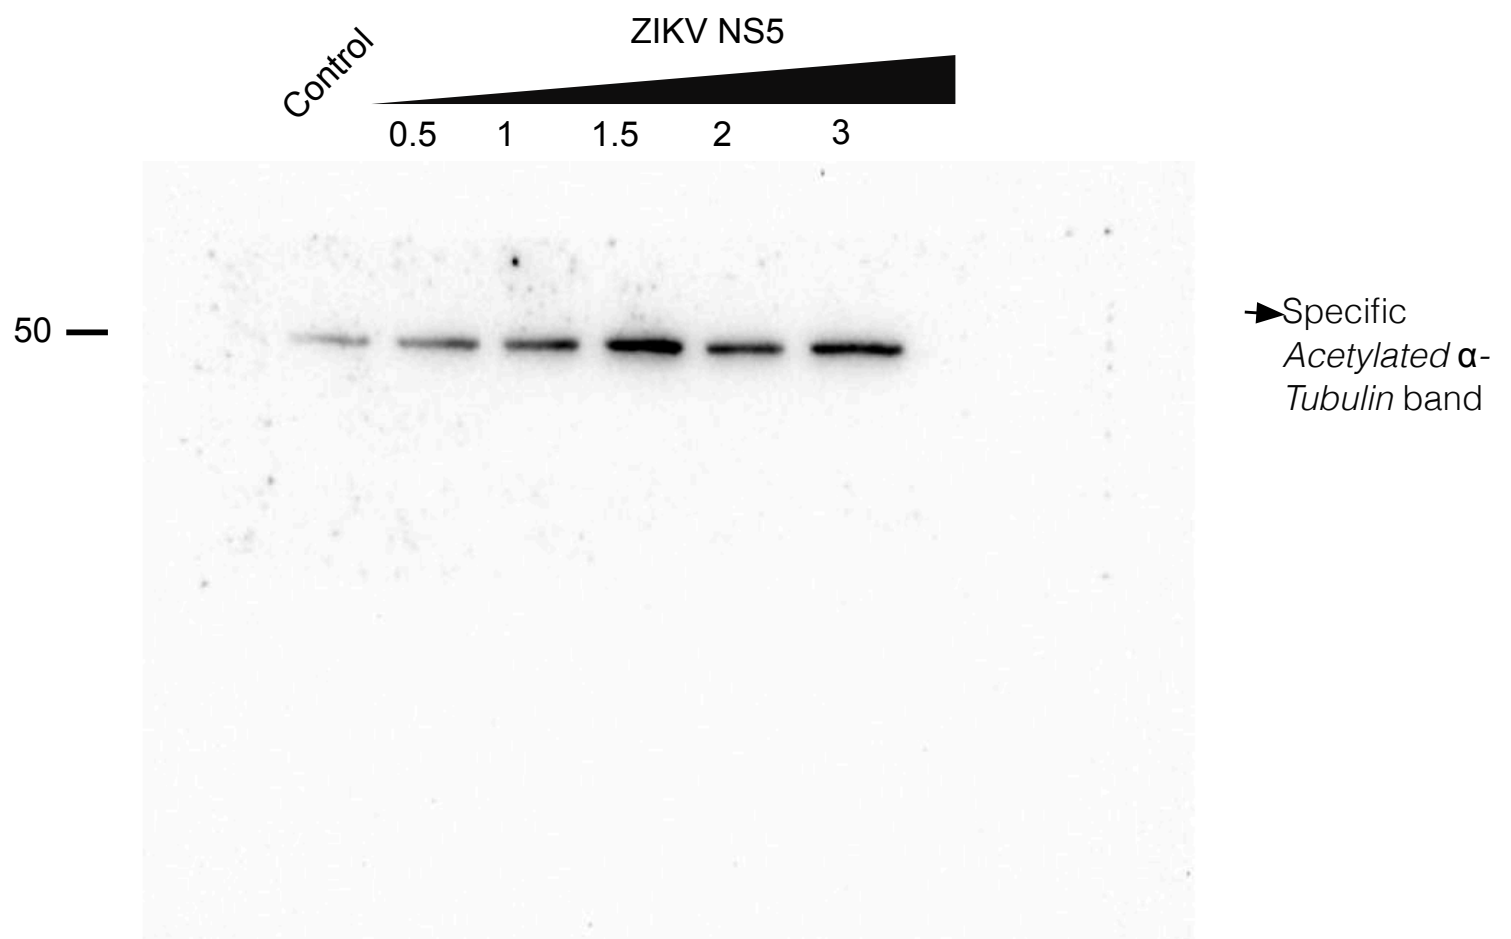

**Figure S2C.** *Replicate 4 myc complete gel*      *Western-blot associated with Figure S2C*  
*Pérez-Yanes, S., et al.*

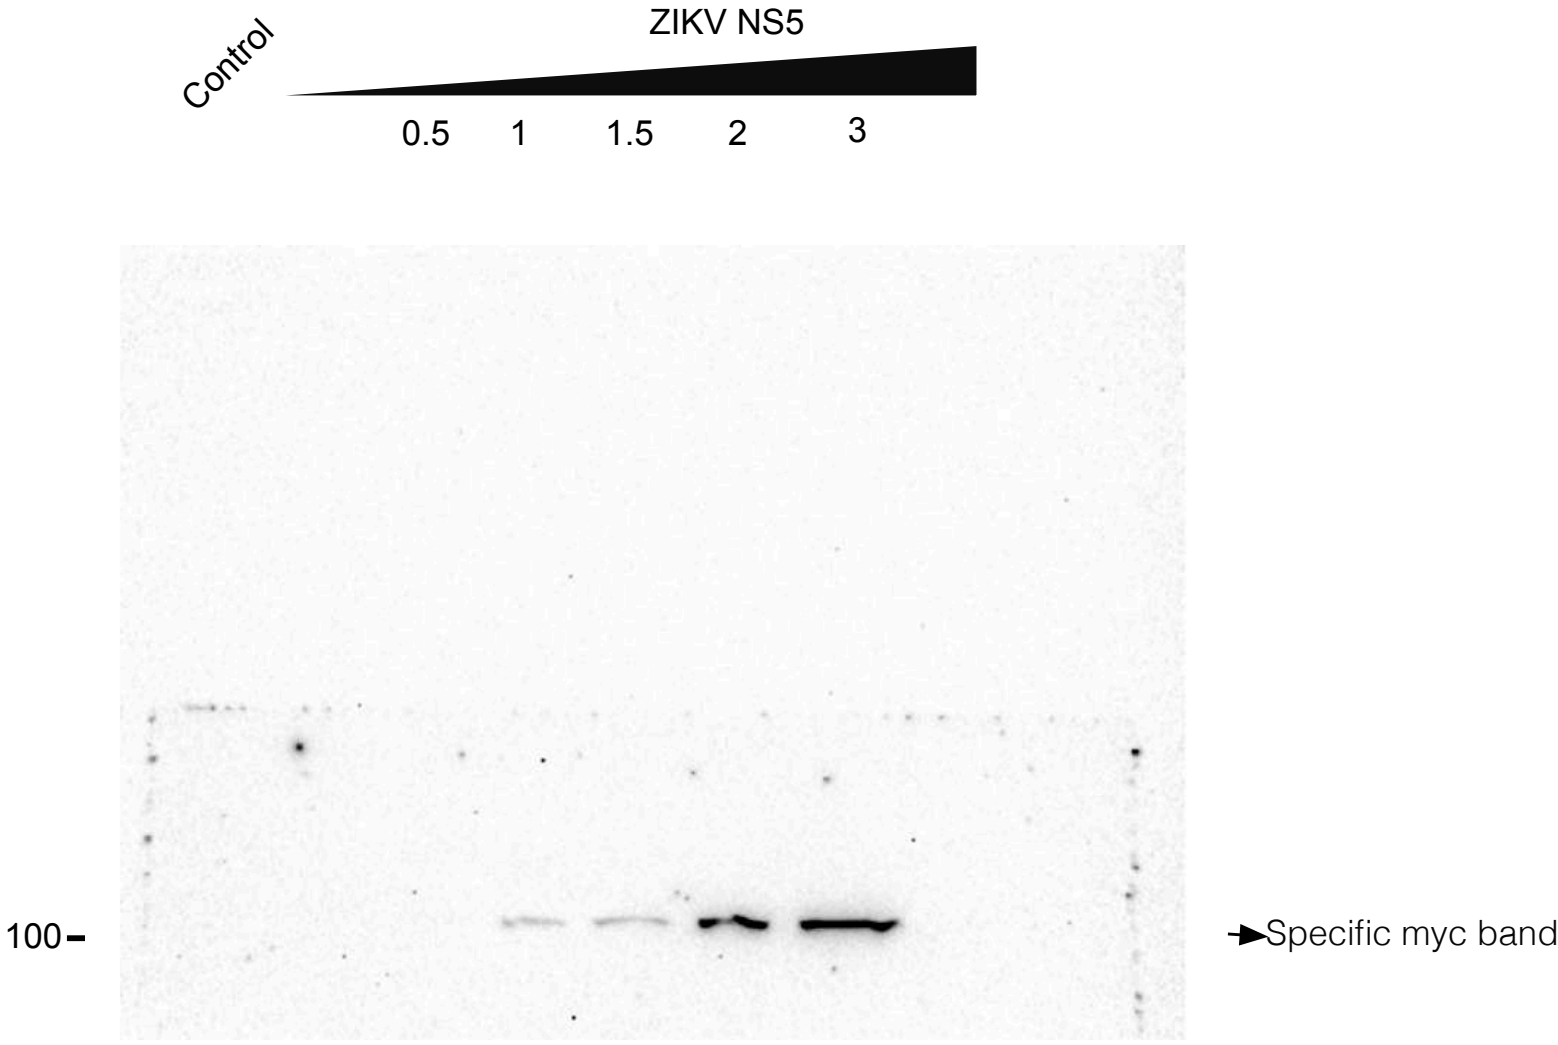



**Figure S2C.** Replicate 4 Total  $\alpha$ -Tubulin complete gel

Western-blot associated with Figure 2C  
Pérez-Yanes, S., et al.

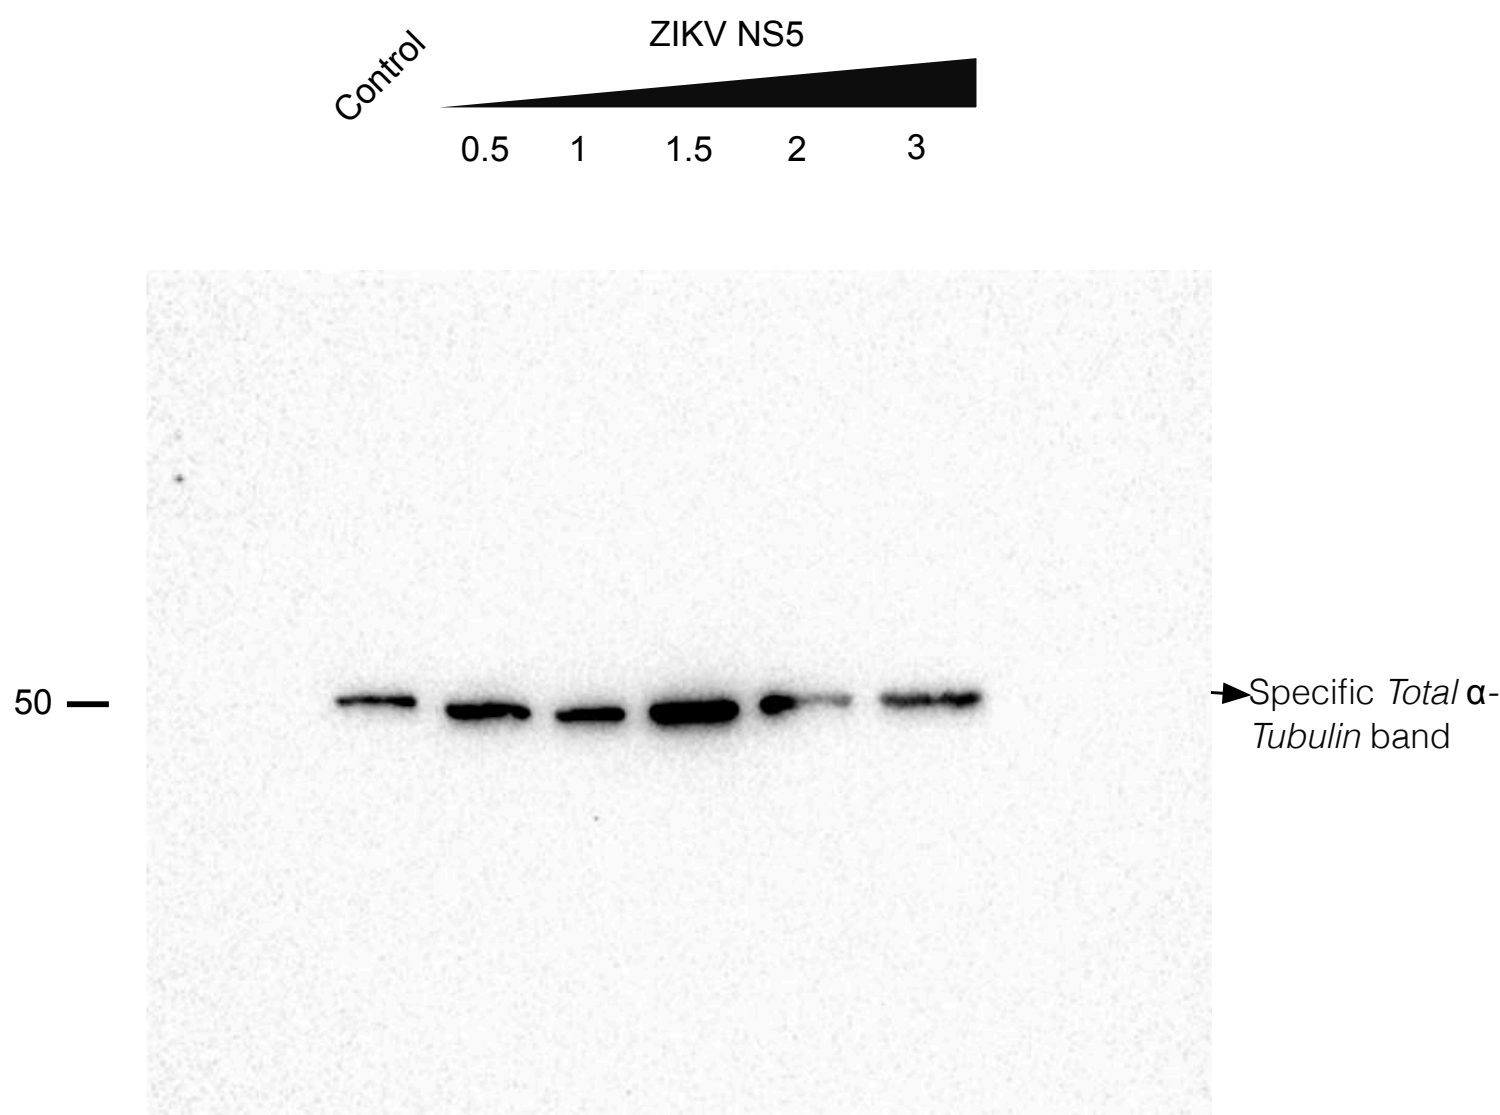

**Figure S2C.** Replicate 4 Acetylated  $\alpha$ -Tubulin complete gel

Western-blot associated with Figure S2C  
Pérez-Yanes, S., et al.

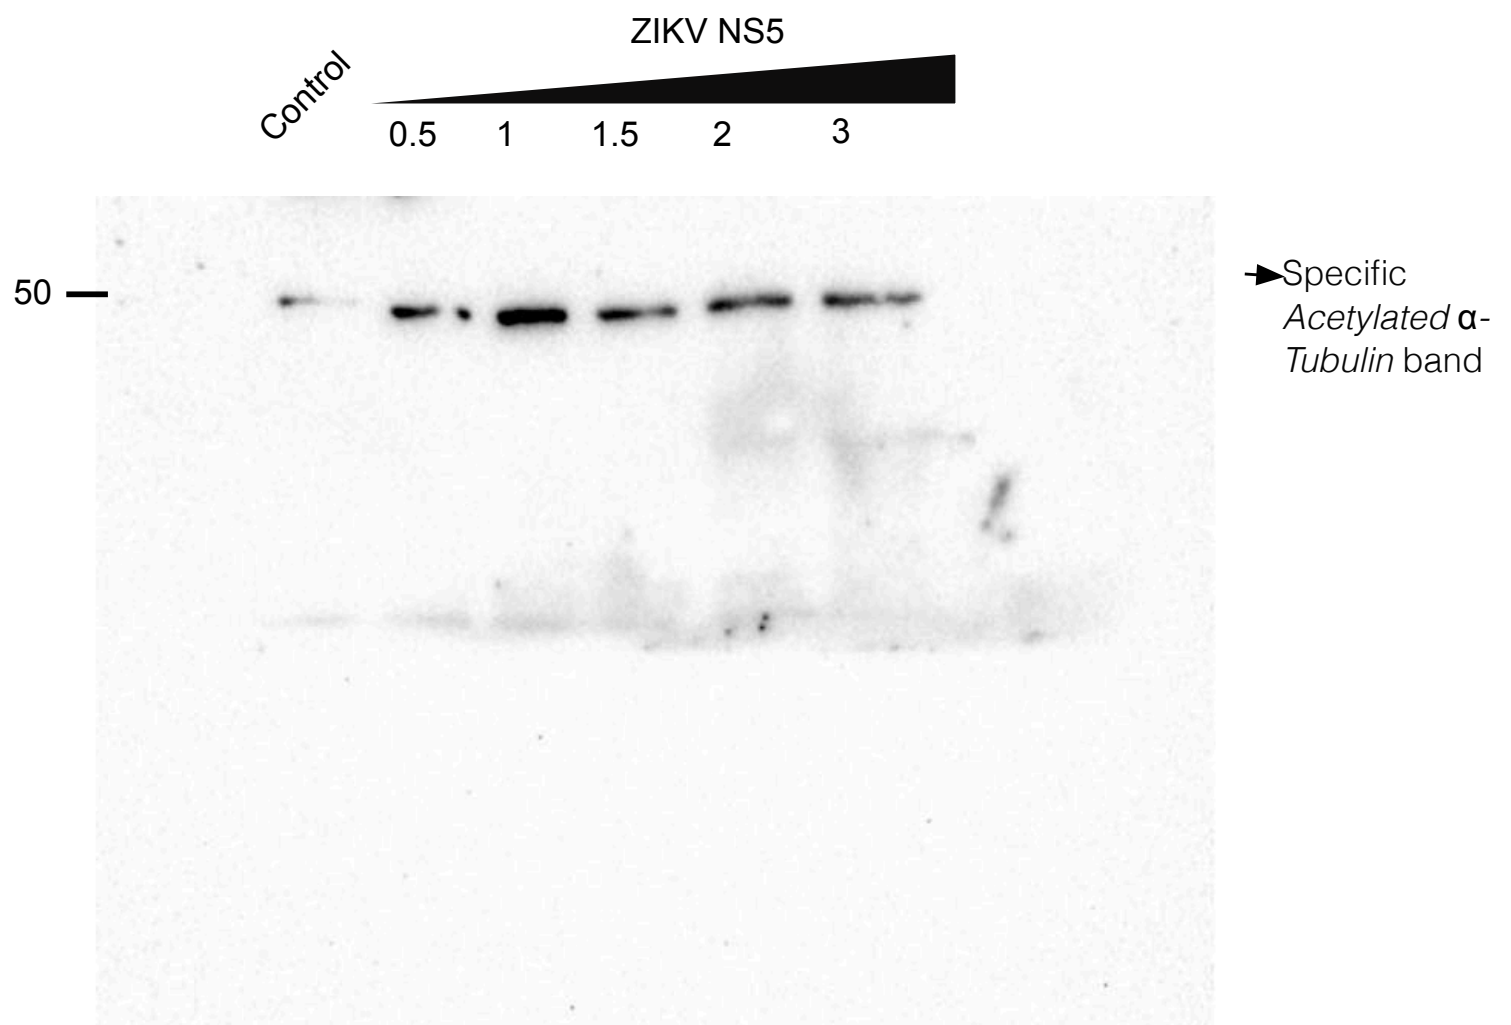

**Figure S2C.** Replicate 5 myc complete gel

Western-blot associated with  
Figure S2C  
Pérez-Yanes, S., et al.

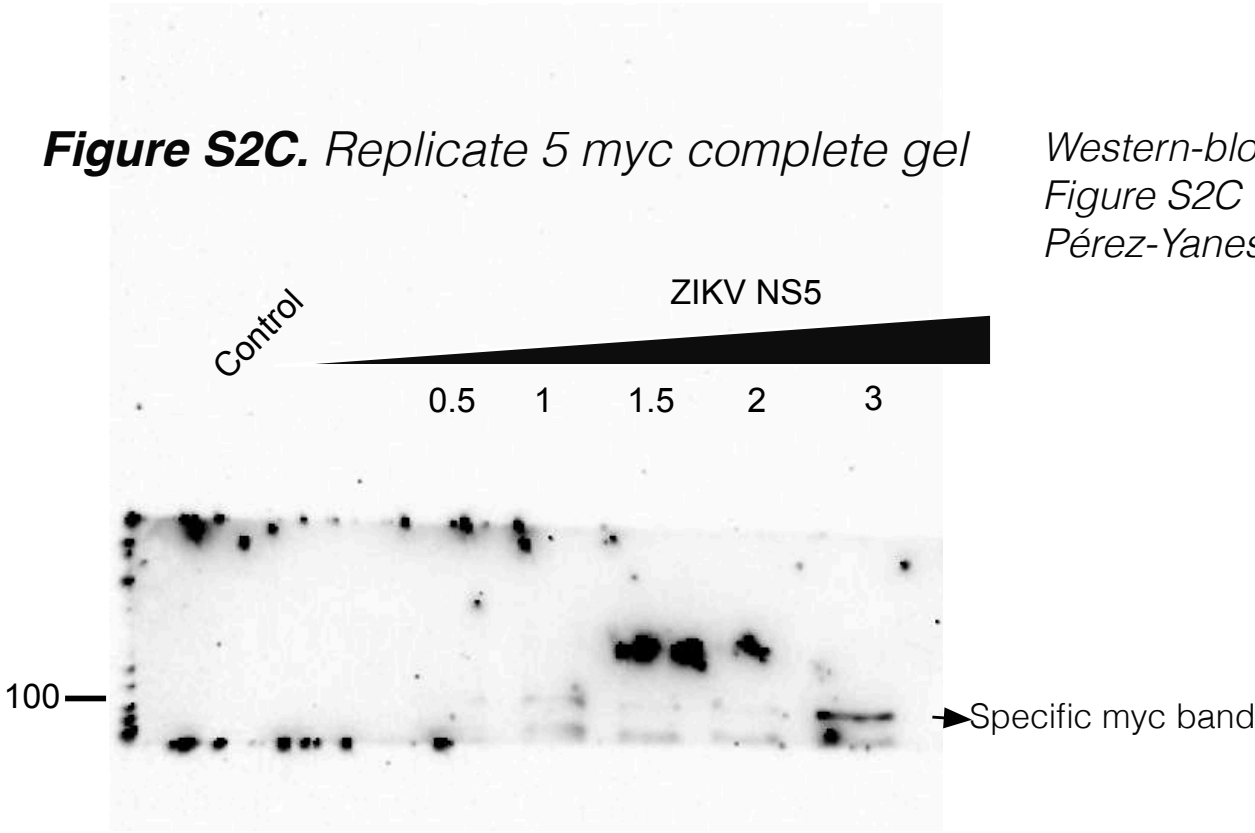

**Figure S2C.** Replicate 5 Total  $\alpha$ -Tubulin complete gel

Western-blot associated with Figure 2C  
Pérez-Yanes, S., et al.

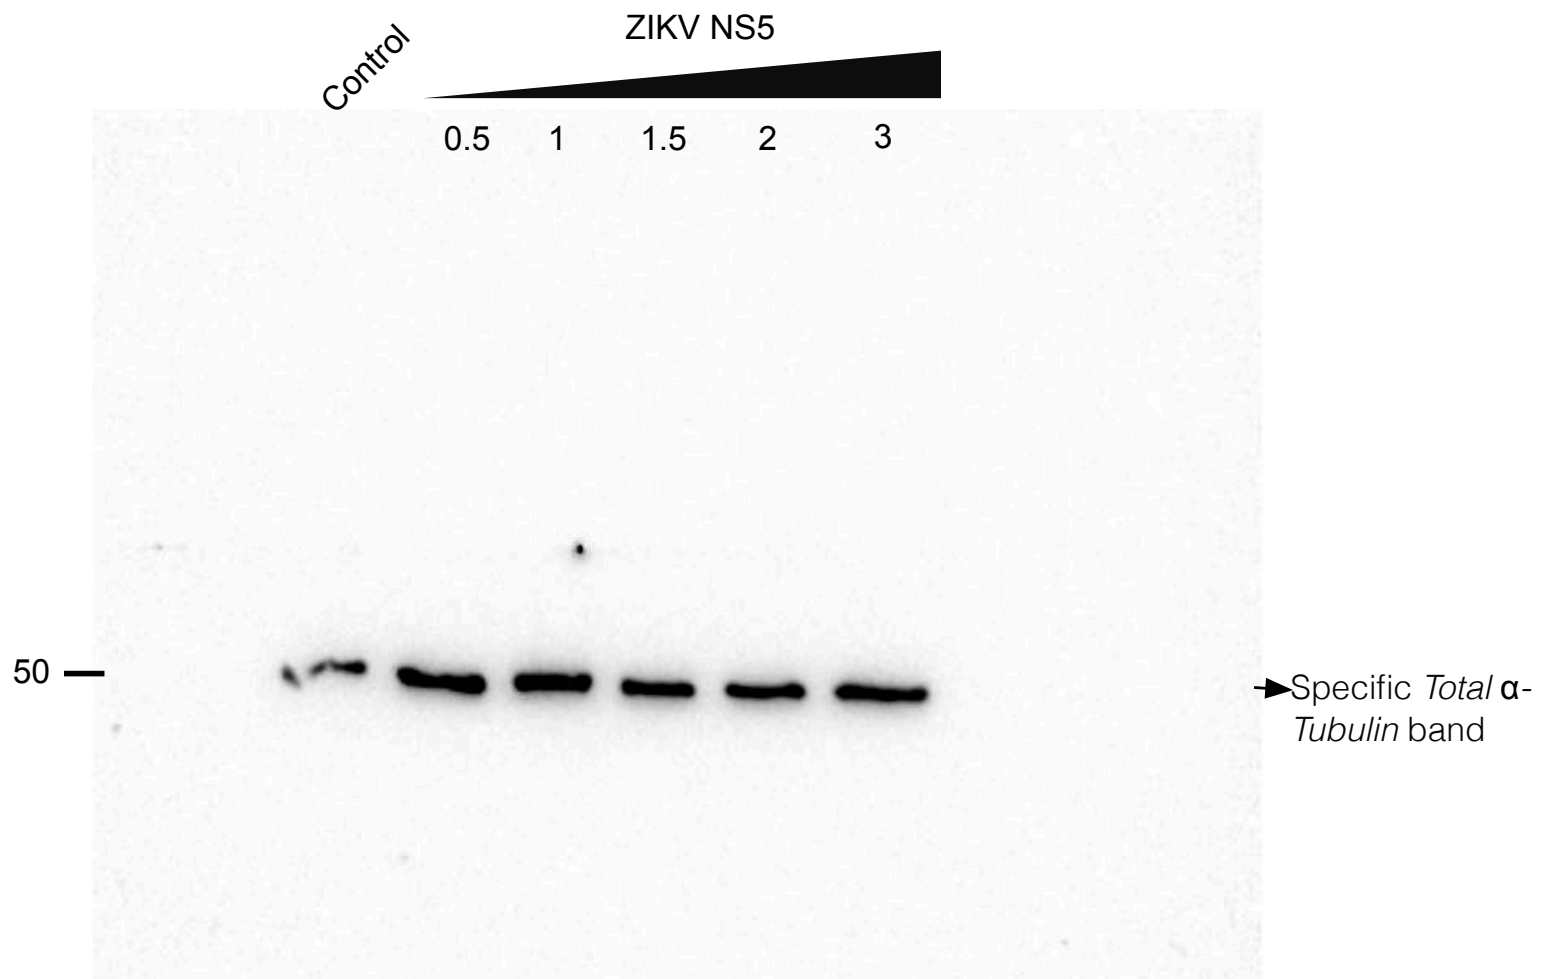

**Figure S2C.** Replicate 5 Acetylated  $\alpha$ -Tubulin complete gel Western-blot associated with Figure S2C  
Pérez-Yanes, S., et al.

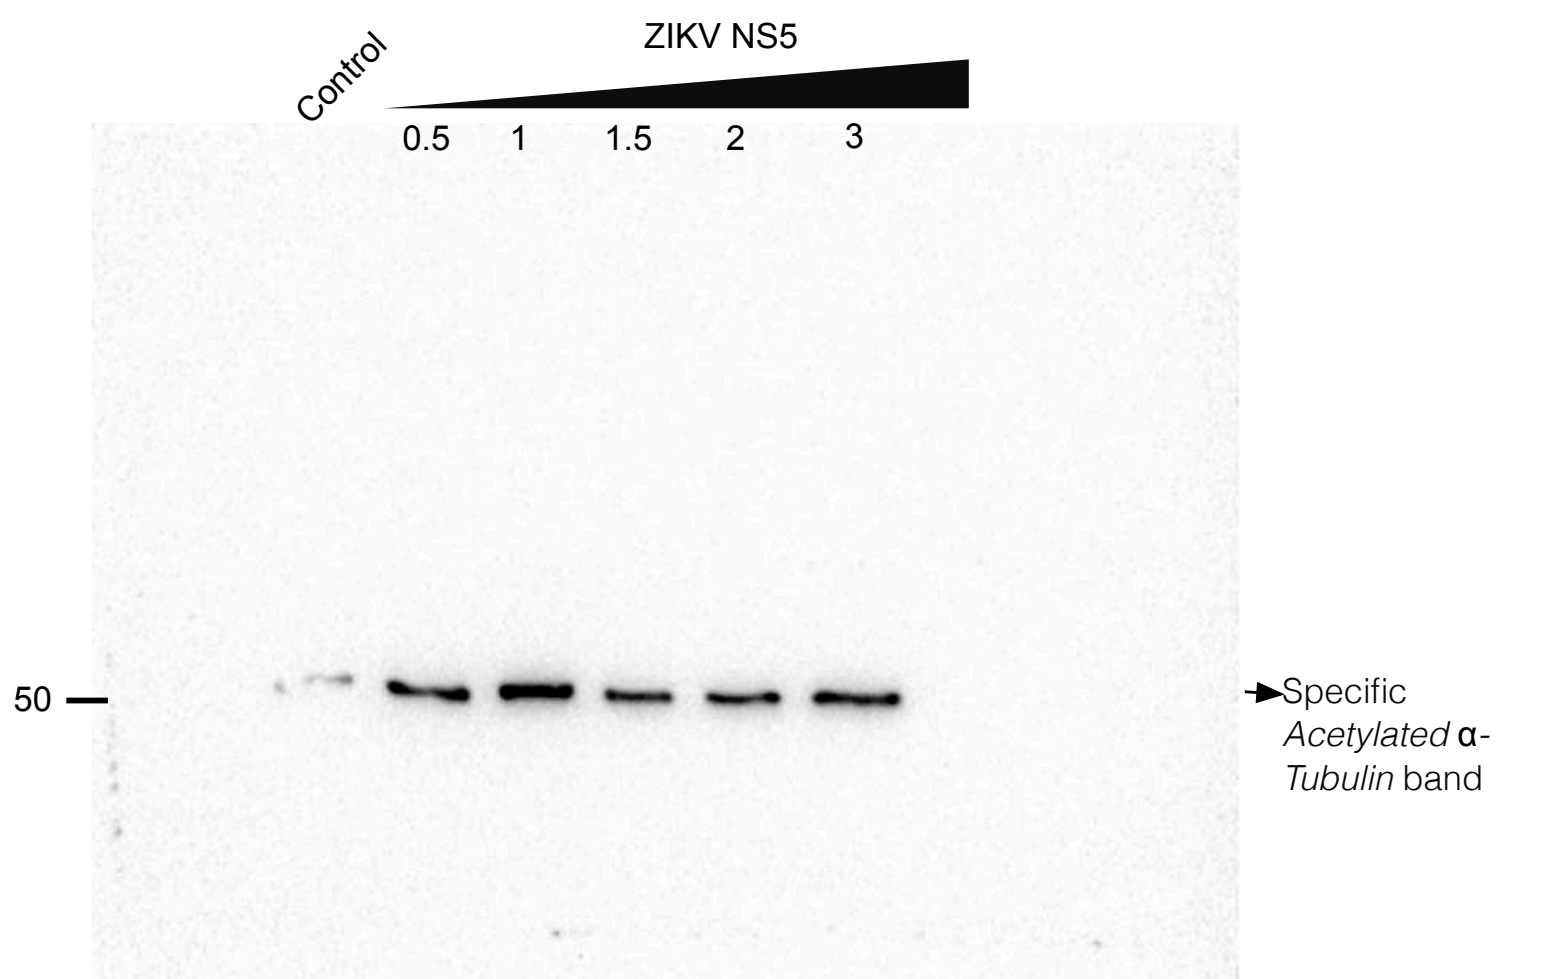

**Figure S2C.** Replicate 6 myc complete gel

Western-blot associated with  
Figure S2C  
Pérez-Yanes, S., et al.

Control                      ZIKV NS5  
0.5      1      1.5      2

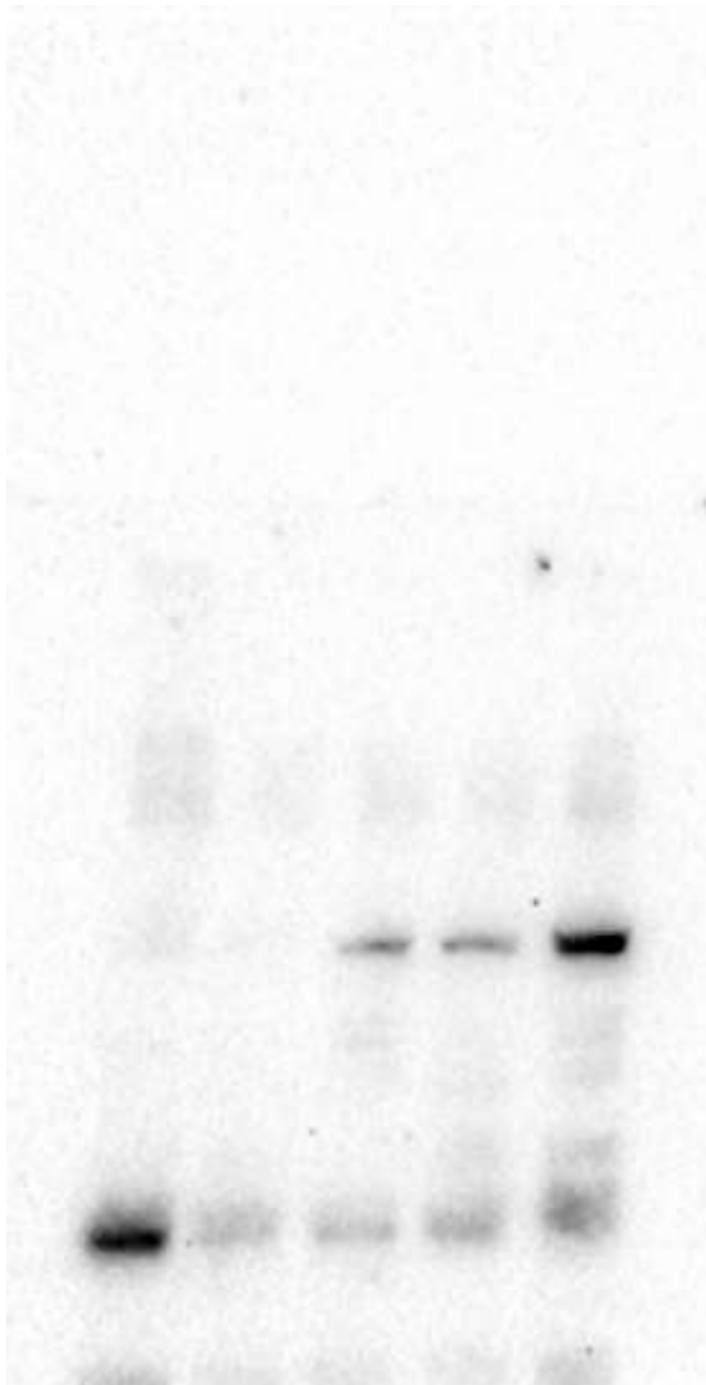

→ Specific myc band

**Figure S2C.** Replicate 6 Total  $\alpha$ -Tubulin complete gel

Western-blot associated with Figure 2C  
Pérez-Yanes, S., et al.

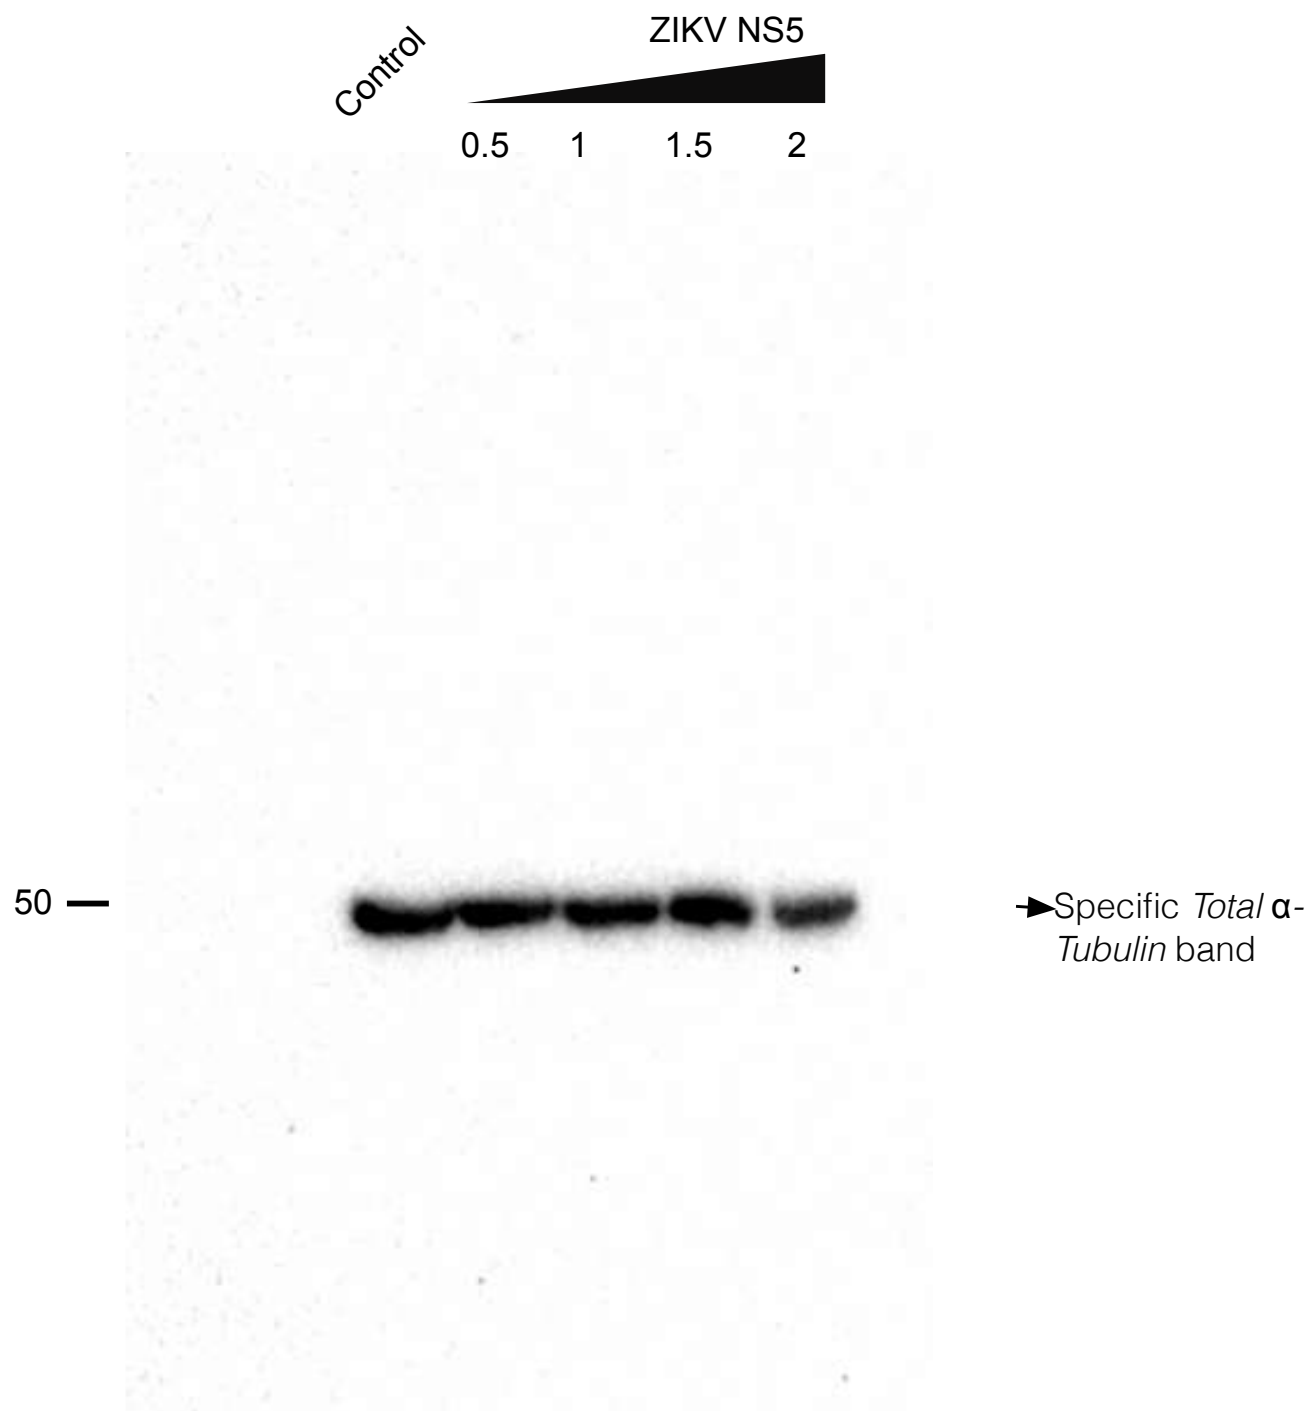

**Figure S2C.** Replicate 6 Acetylated  $\alpha$ -Tubulin complete gel Western-blot associated with Figure S2C  
Pérez-Yanes, S., et al.

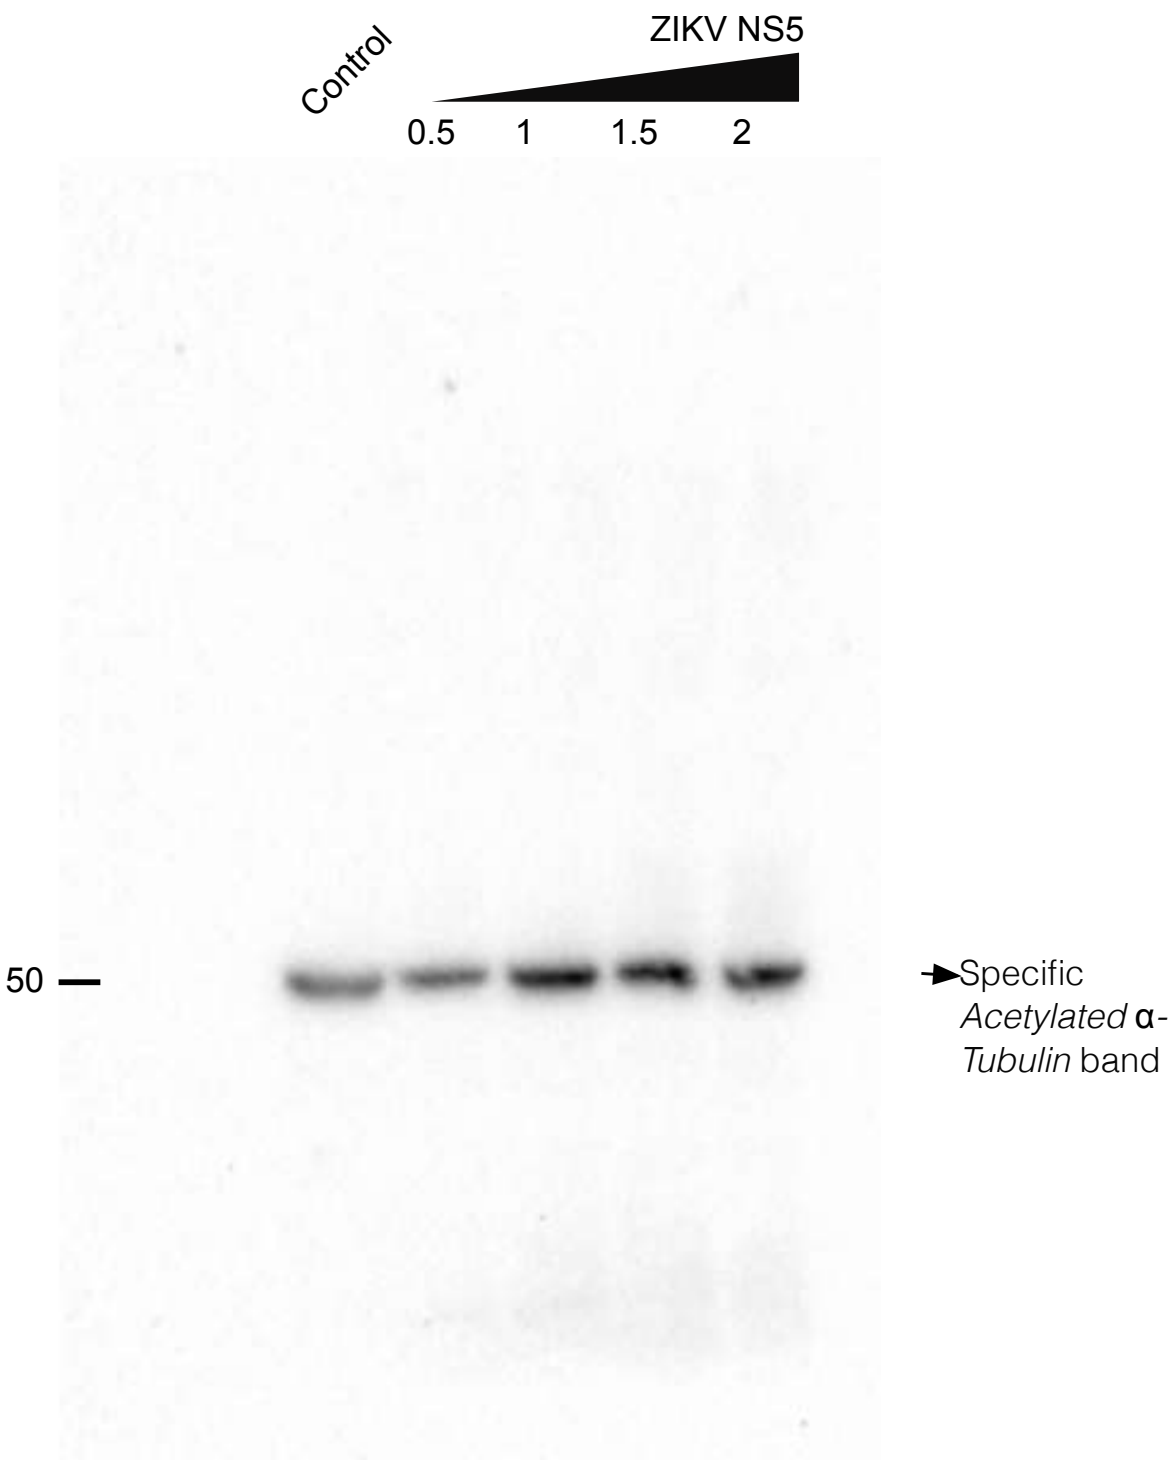



**Figure S2C.** Replicate 7 myc complete gel

Western-blot associated with  
Figure S2C  
Pérez-Yanes, S., et al.

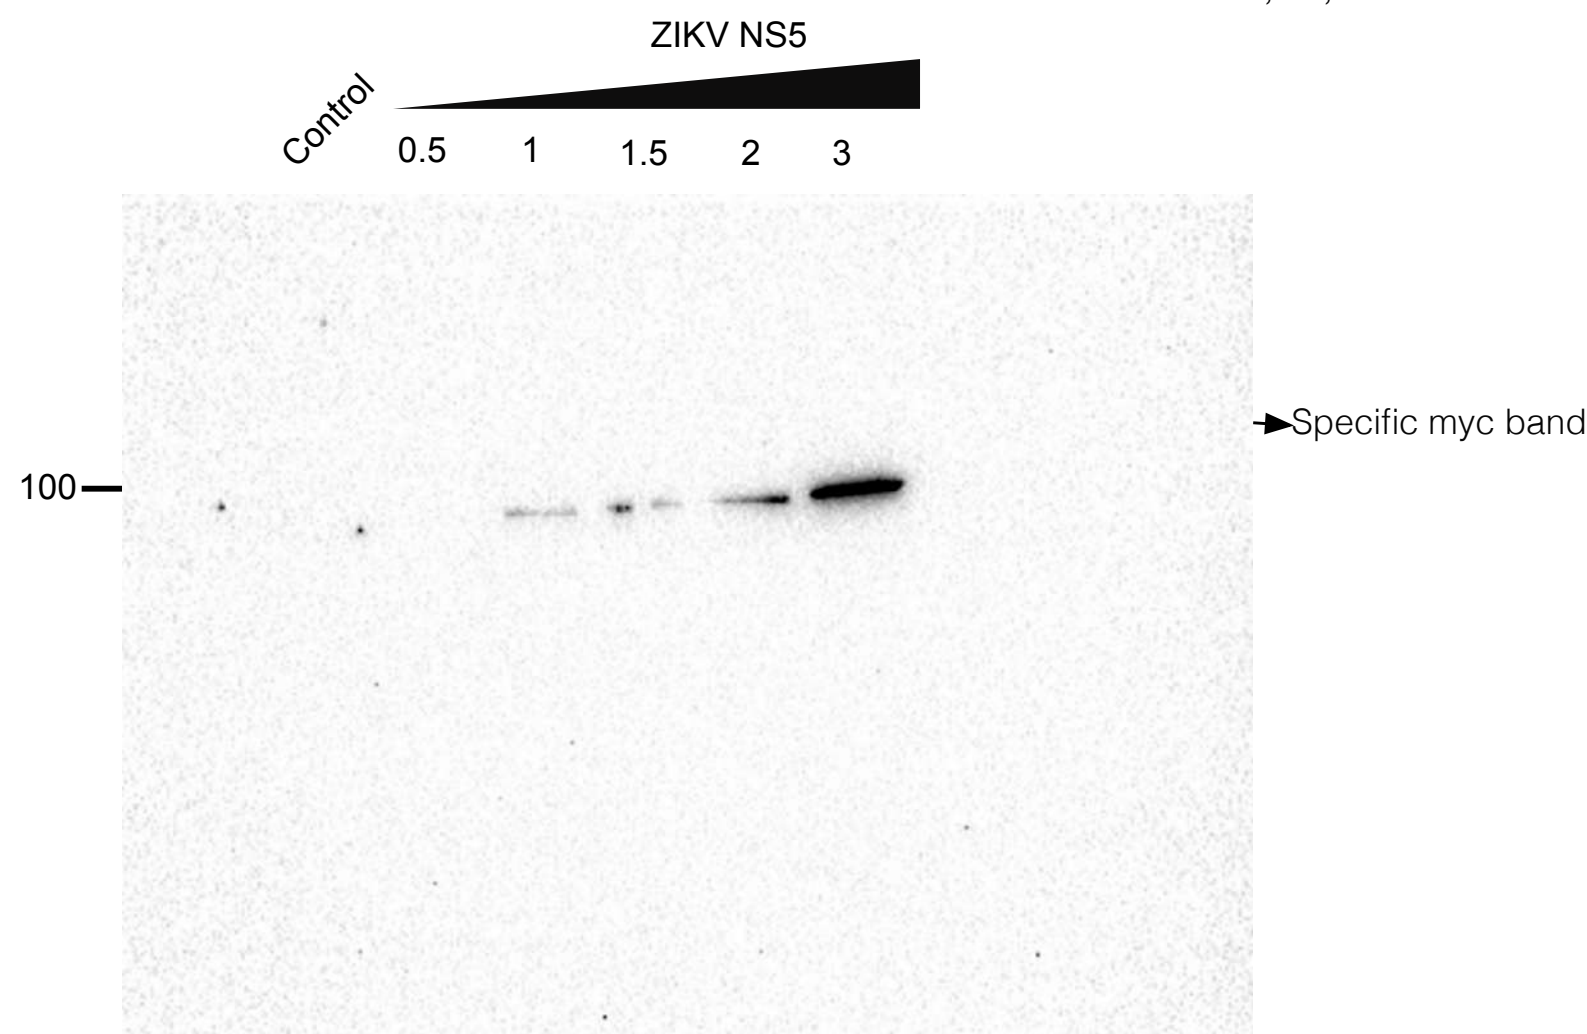

**Figure S2C.** Replicate 7 Total  $\alpha$ -Tubulin complete gel

Western-blot associated  
with Figure 3C  
Pérez-Yanes, S., et al.

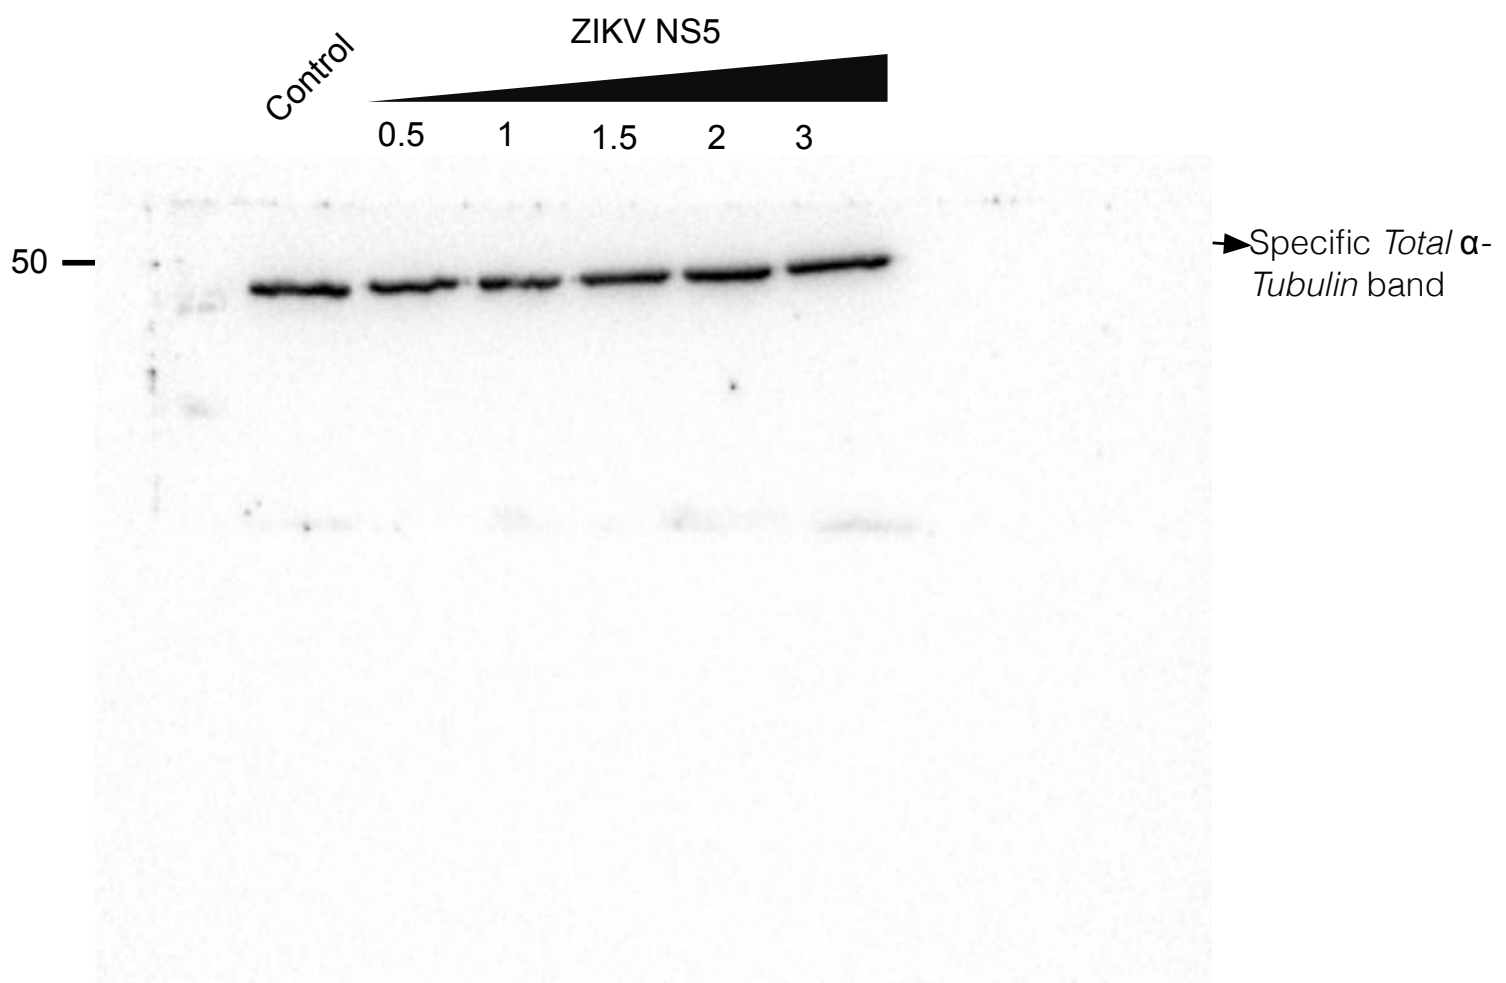

**Figure S2C.** Replicate 7 Acetylated  $\alpha$ -Tubulin complete gel

Western-blot associated with Figure S2C  
Pérez-Yanes, S., et al.

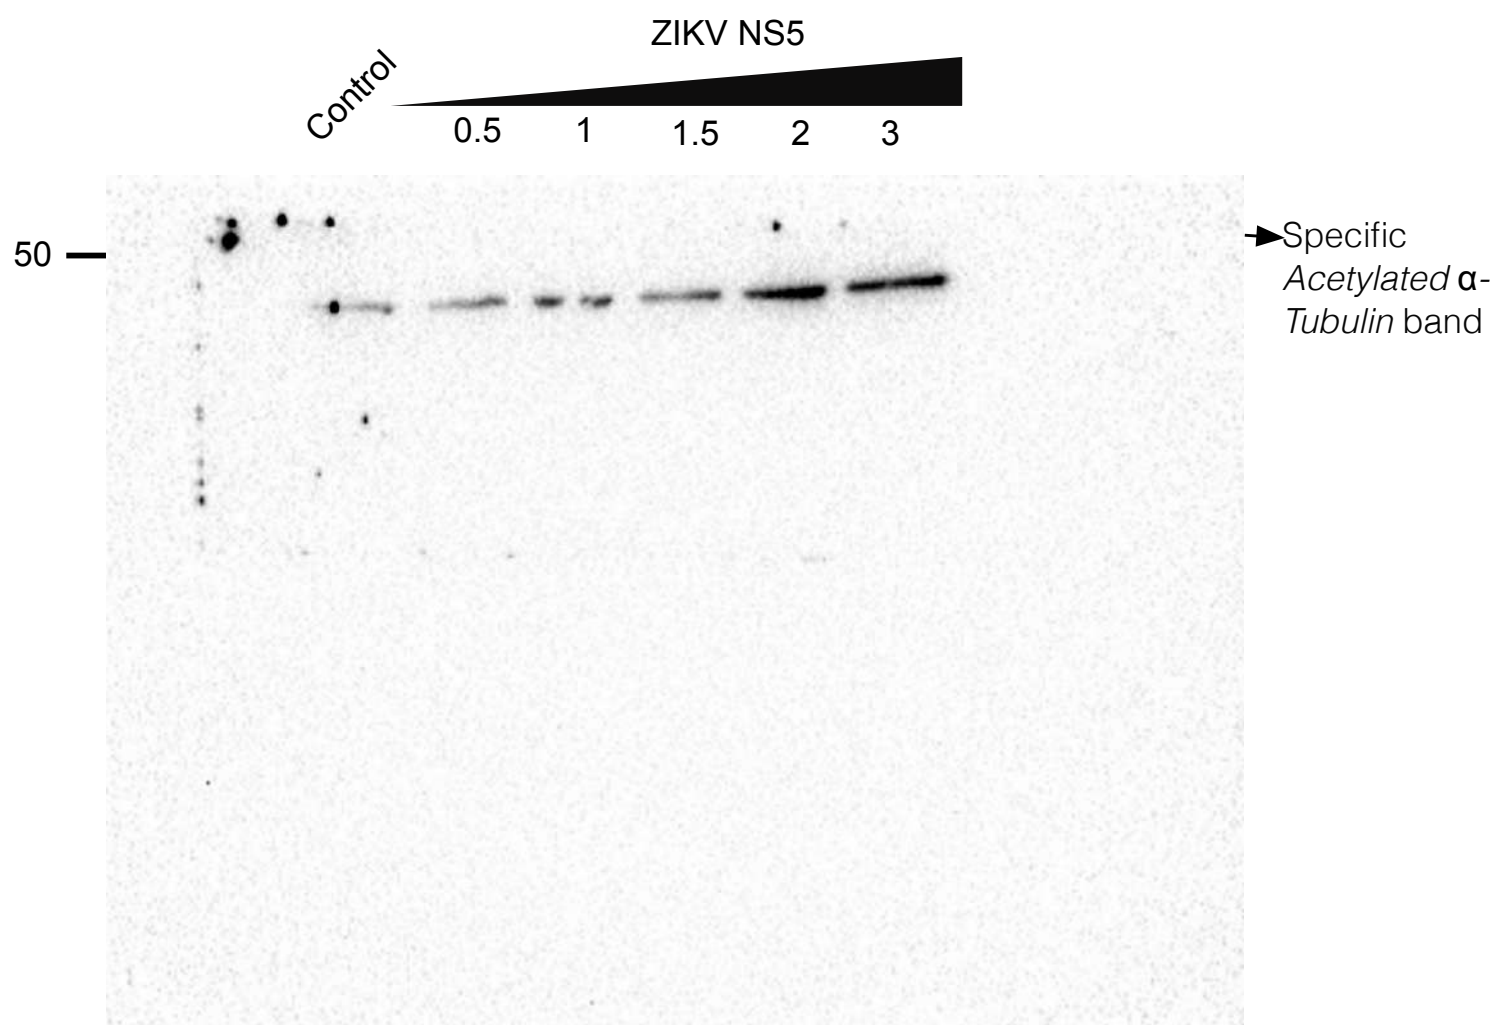

**Figure S2C.** Replicate 8 myc complete gel

Western-blot associated with  
Figure S2C  
Pérez-Yanes, S., et al.

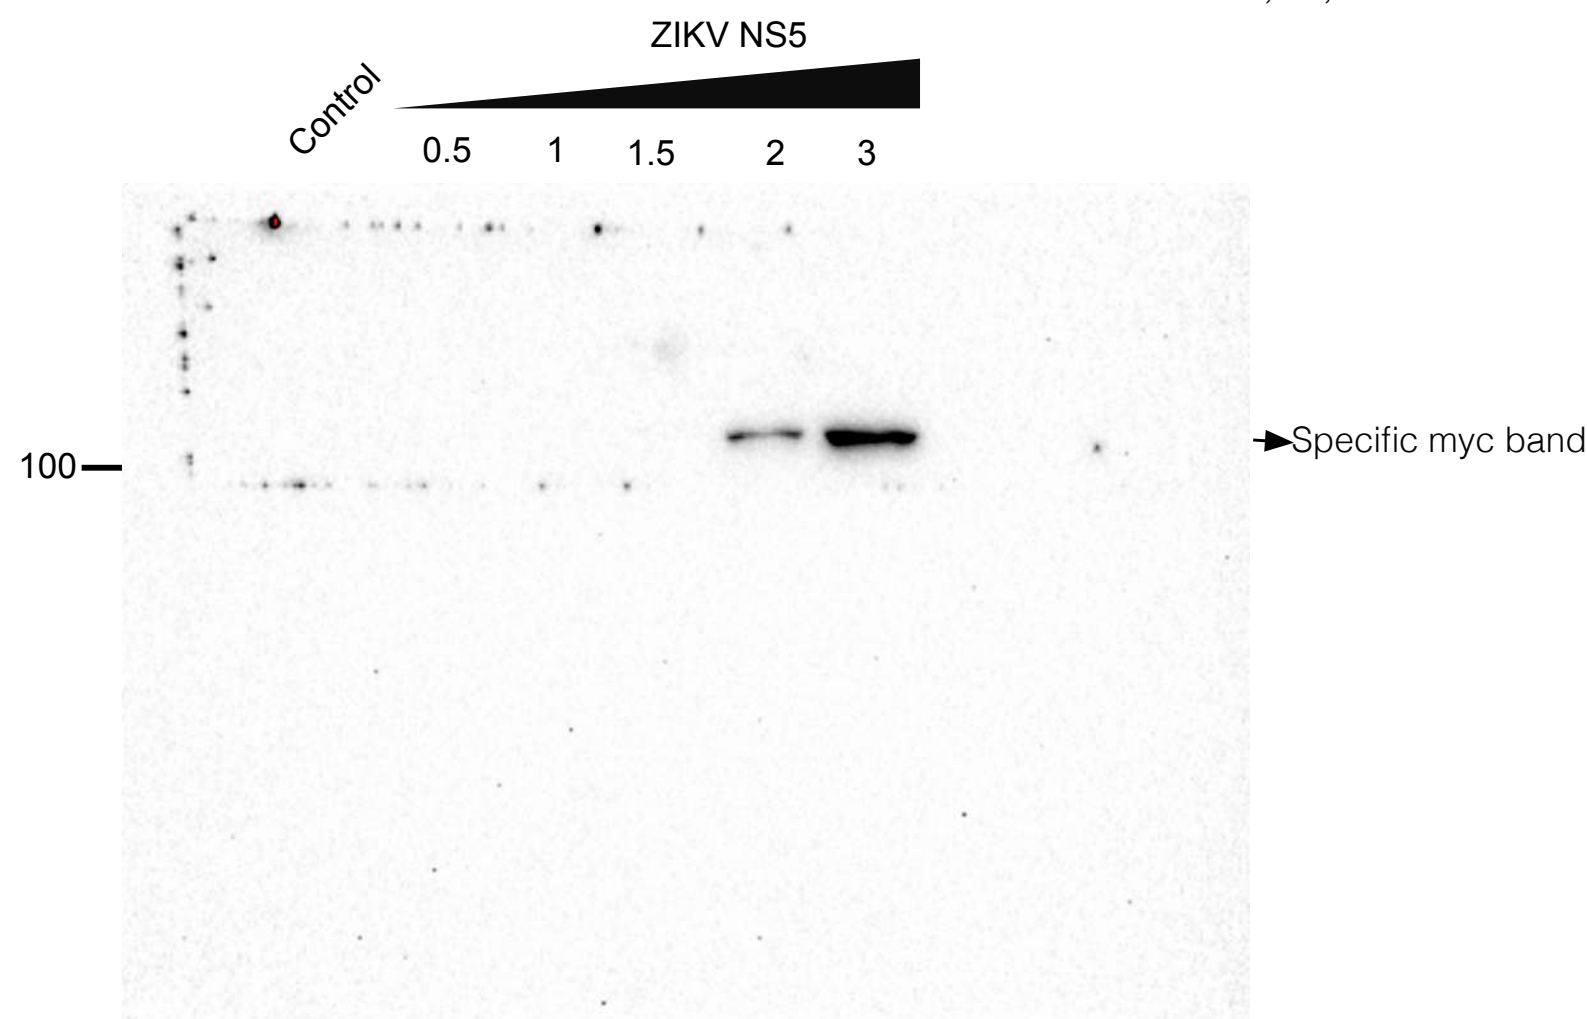

**Figure S2C.** Replicate 8 Total  $\alpha$ -Tubulin complete gel

Western-blot associated  
with Figure 2C  
Pérez-Yanes, S., et al.

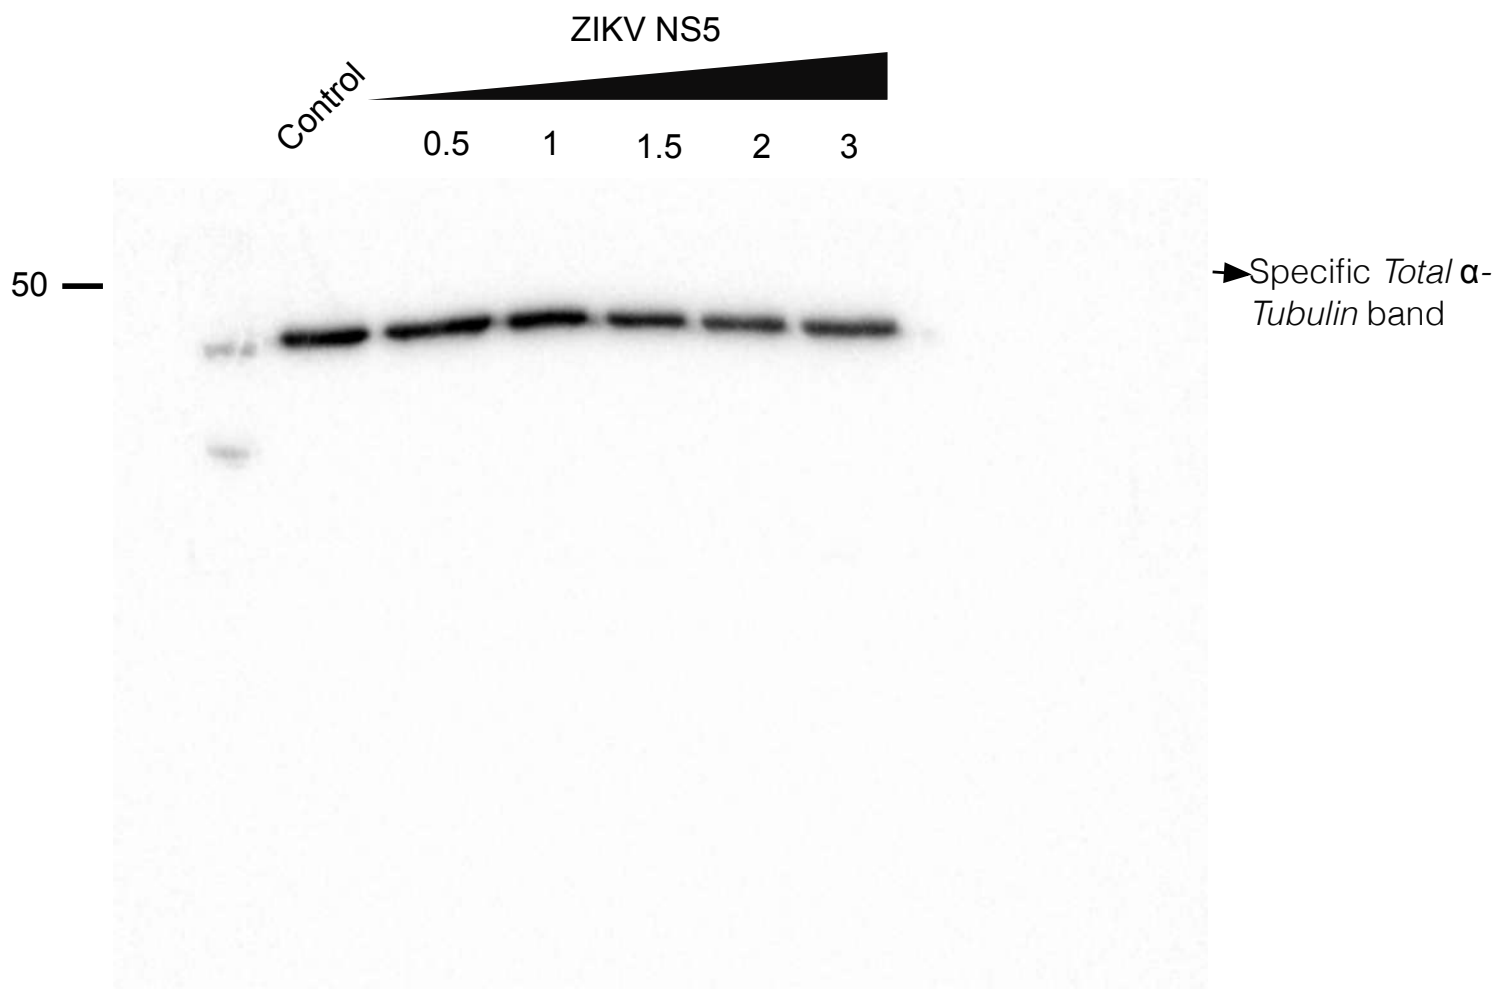

**Figure S2C.** Replicate 8 Acetylated  $\alpha$ -Tubulin complete gel Western-blot associated with Figure S2C  
Pérez-Yanes, S., et al.

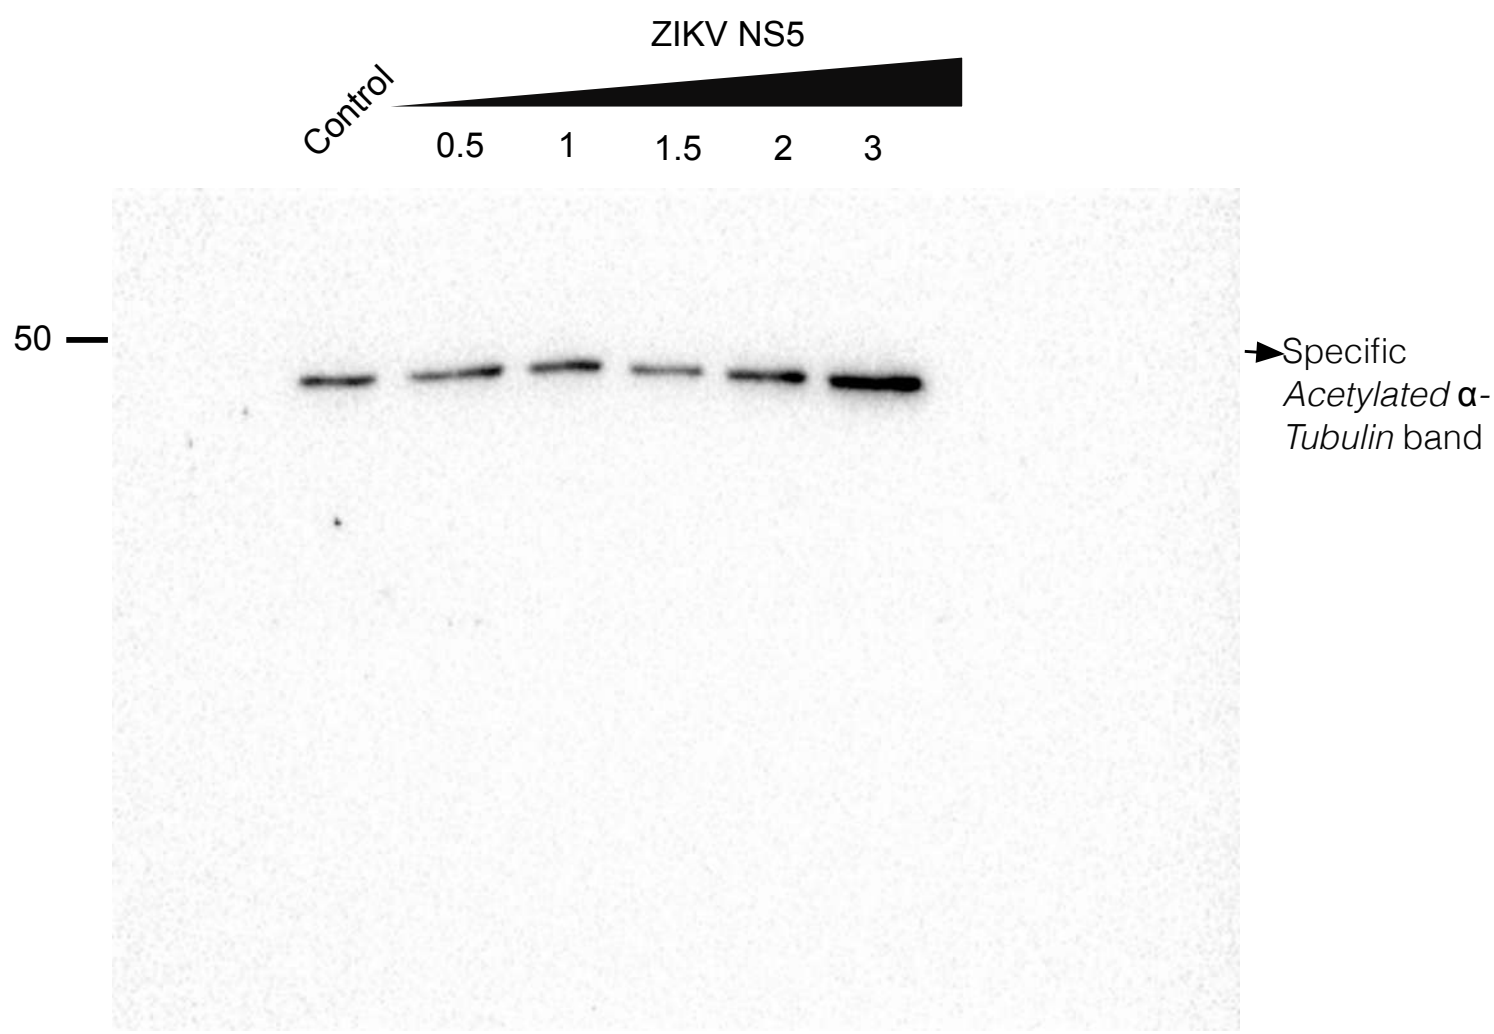

**Figure S2C.** Replicate 9 myc complete gel

Western-blot associated with  
Figure S2C  
Pérez-Yanes, S., et al.

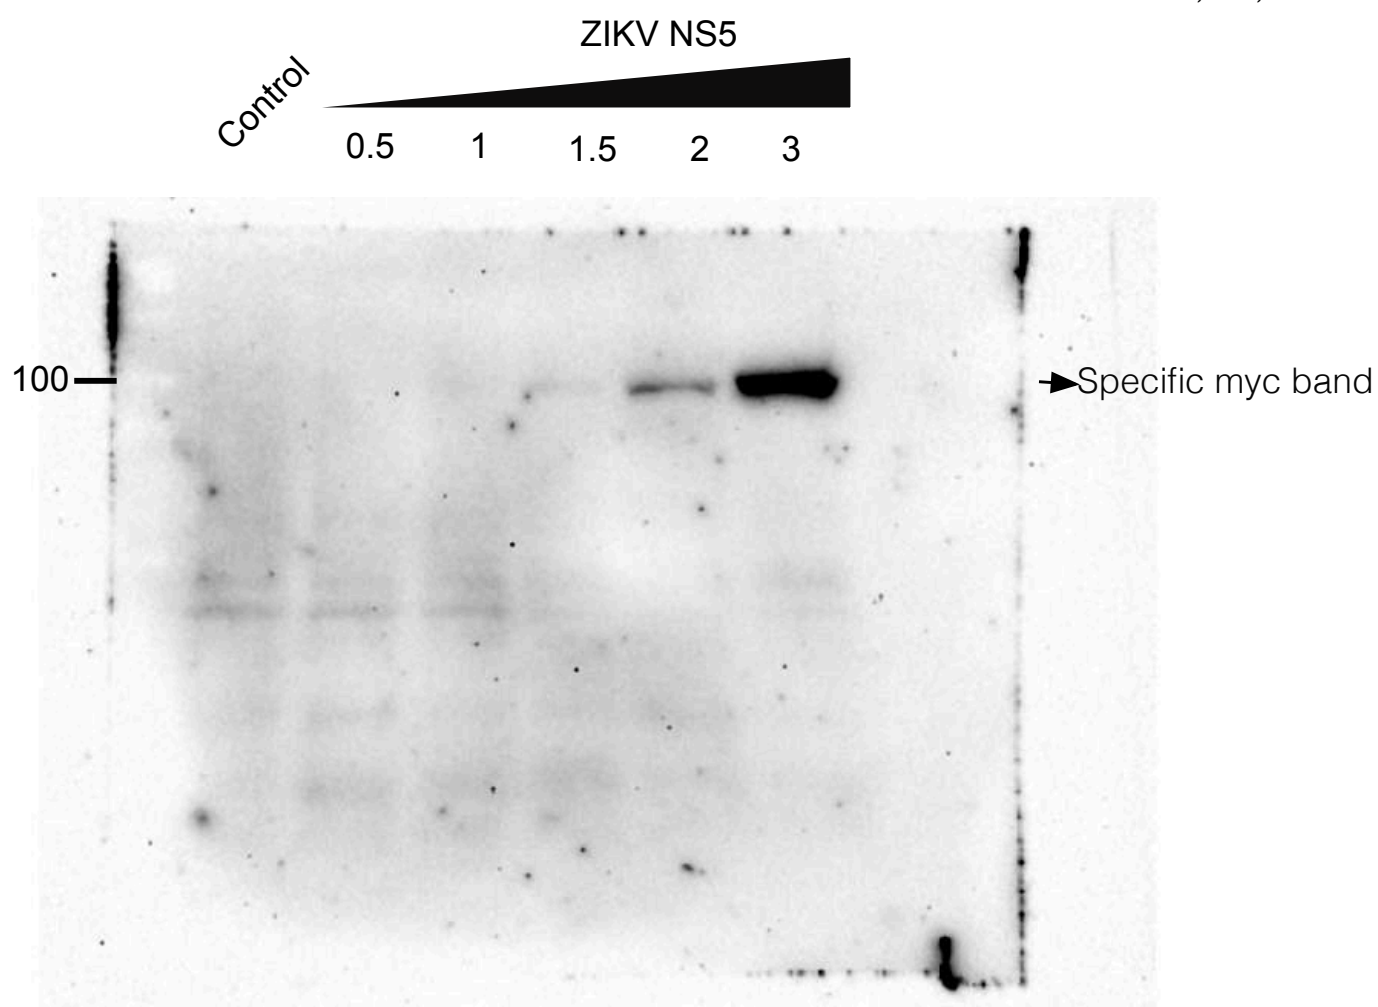

**Figure S2C.** Replicate 9 Total  $\alpha$ -Tubulin complete gel

Western-blot associated  
with Figure 2C  
Pérez-Yanes, S., et al.

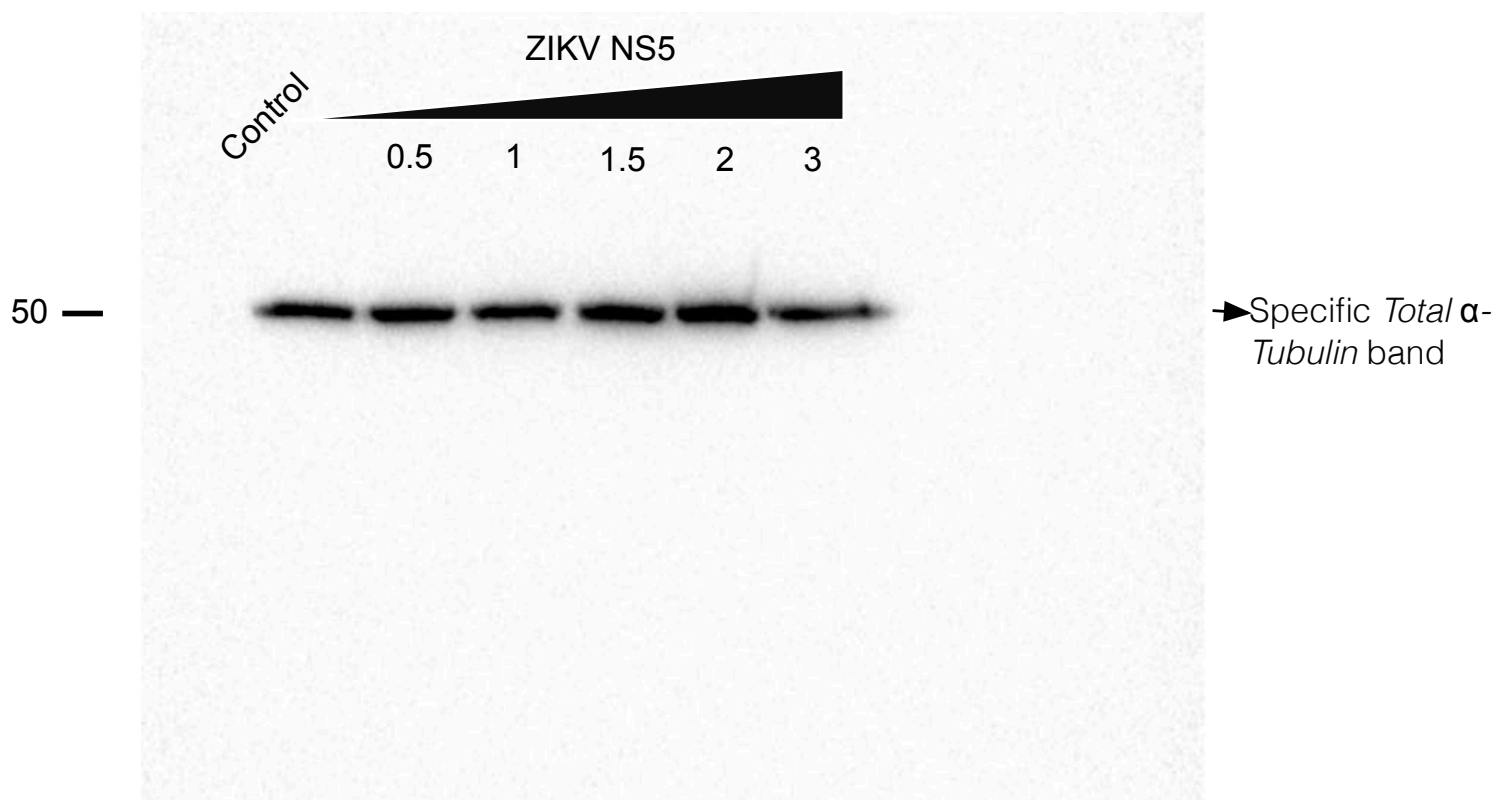



**Figure S2C.** *Replicate 9 Acetylated  $\alpha$ -Tubulin complete gel* Western-blot associated with Figure S2C  
*Pérez-Yanes, S., et al.*

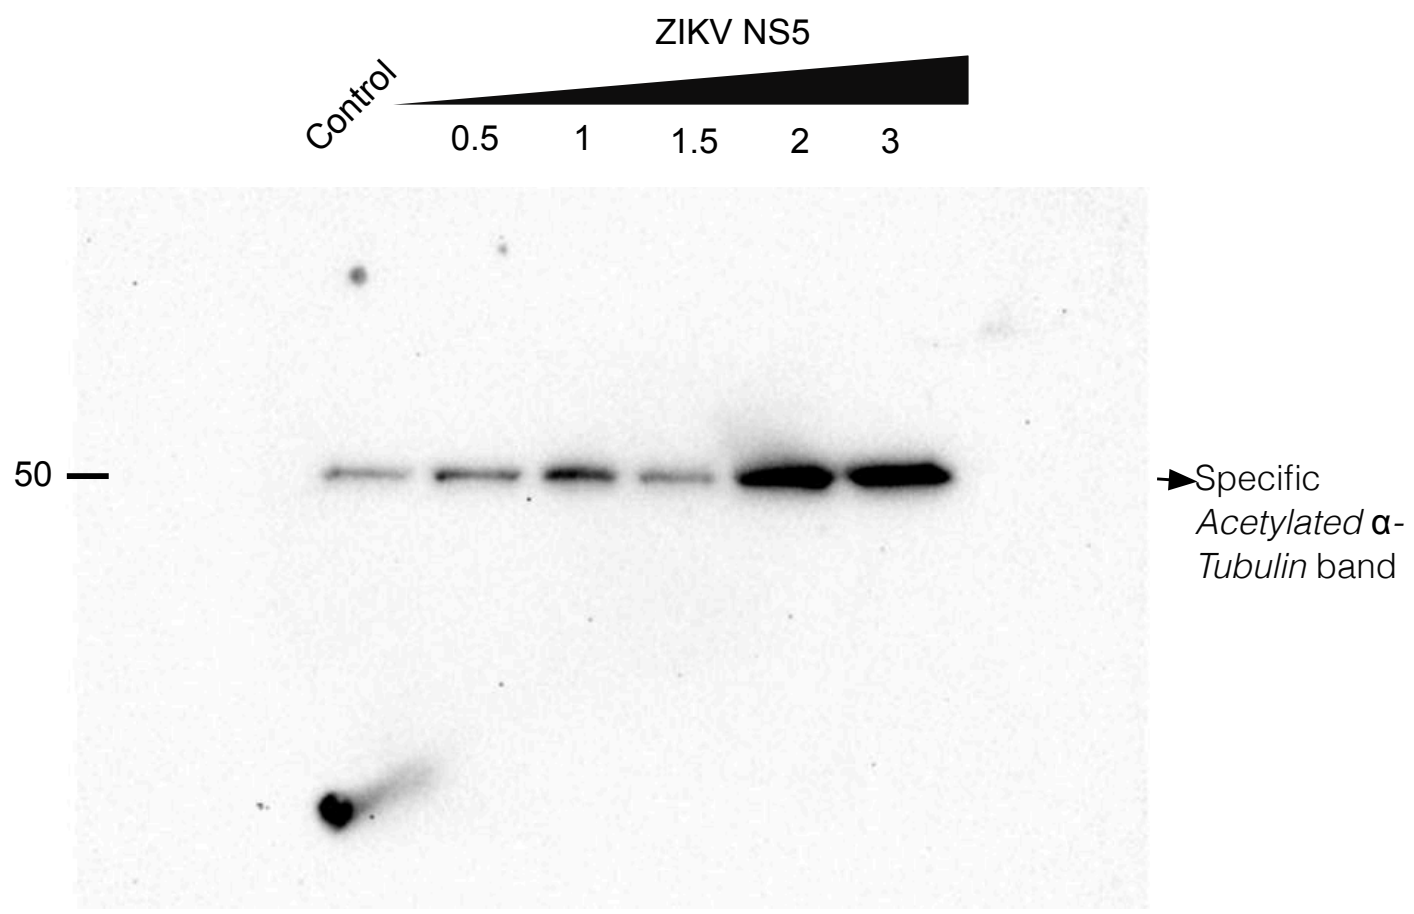

**Figura S2D.** Western-blot replicates associated with Figure S2D.

**Replicate 1 as figure format**

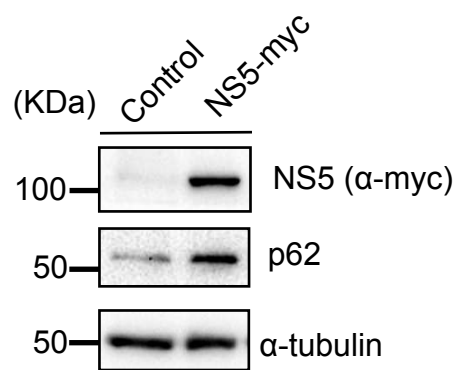

**Replicate 2 as figure format**

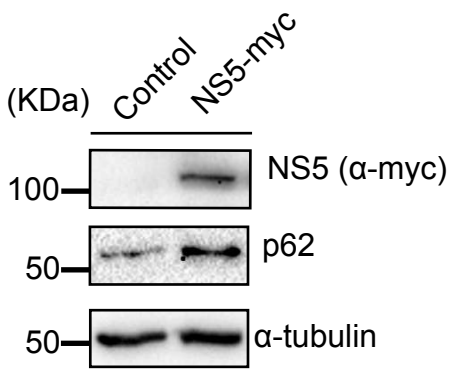

**Replicate 3 as figure format**

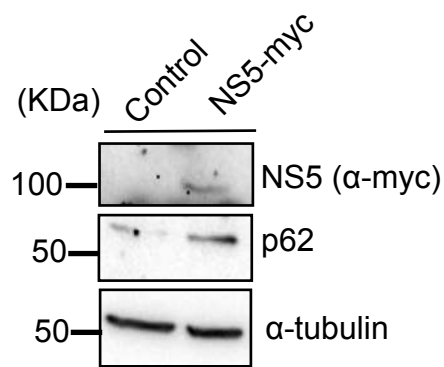

**Replicate 4 as figure format**

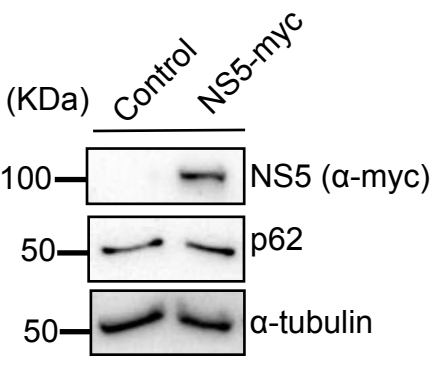

**Figure S2D.** Replicate 1 myc complete gel

Western-blot associated with  
Figure S2D  
Pérez-Yanes, S., et al.

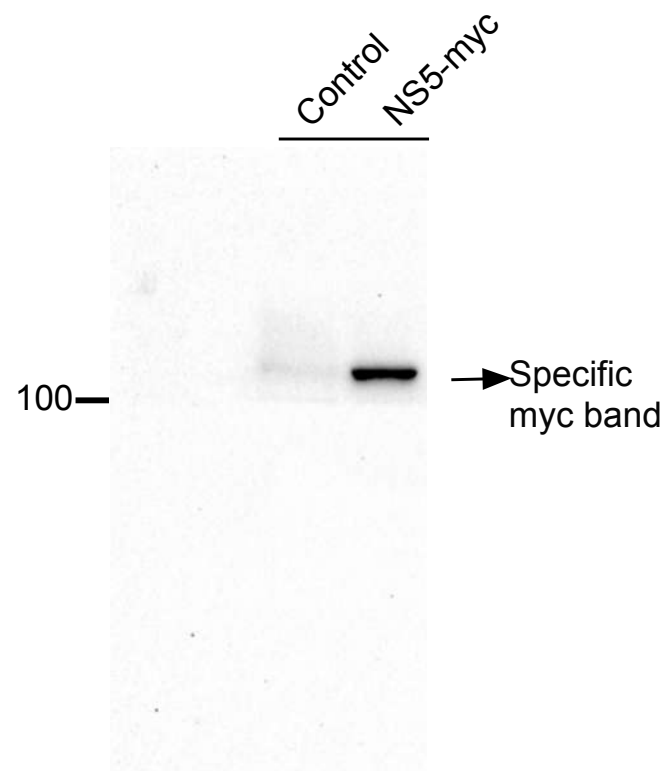

**Figure S2D.** Replicate 1 p62 complete gel

Western-blot associated with  
Figure S2D  
Pérez-Yanes, S., et al.

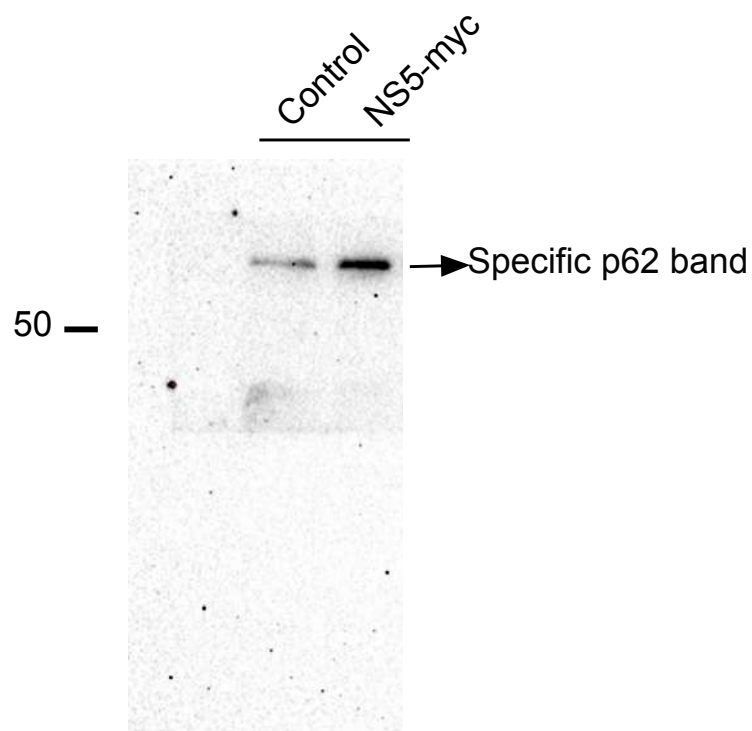

**Figure S2D.** Replicate 1 Total  $\alpha$ -Tubulin complete gel

Western-blot associated with  
Figure S2D  
Pérez-Yanes, S., et al.

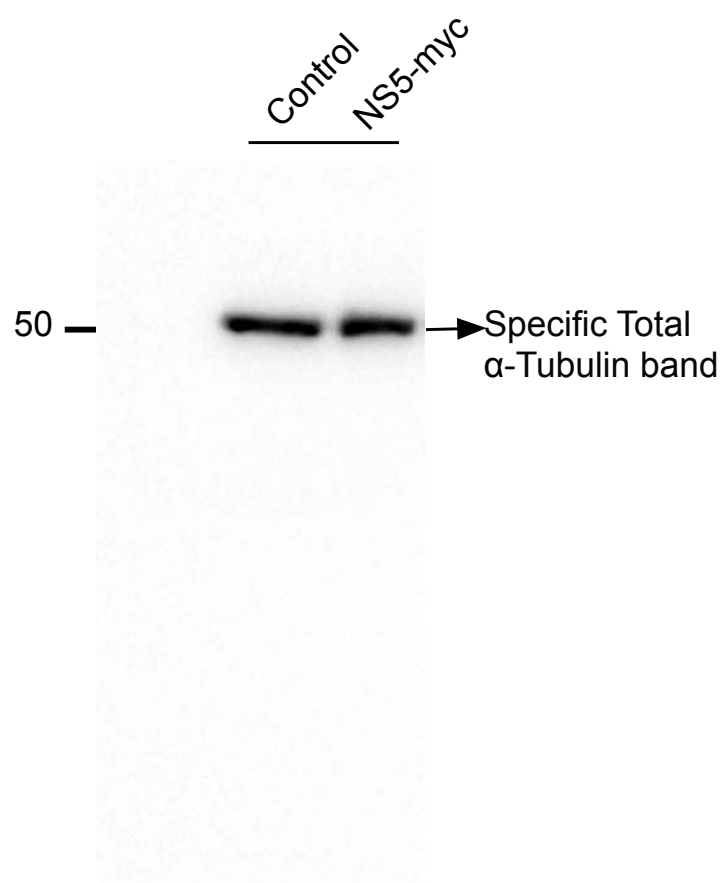

**Figure S2D.** Replicate 2 myc complete gel

Western-blot associated with  
Figure S2D  
Pérez-Yanes, S., et al.

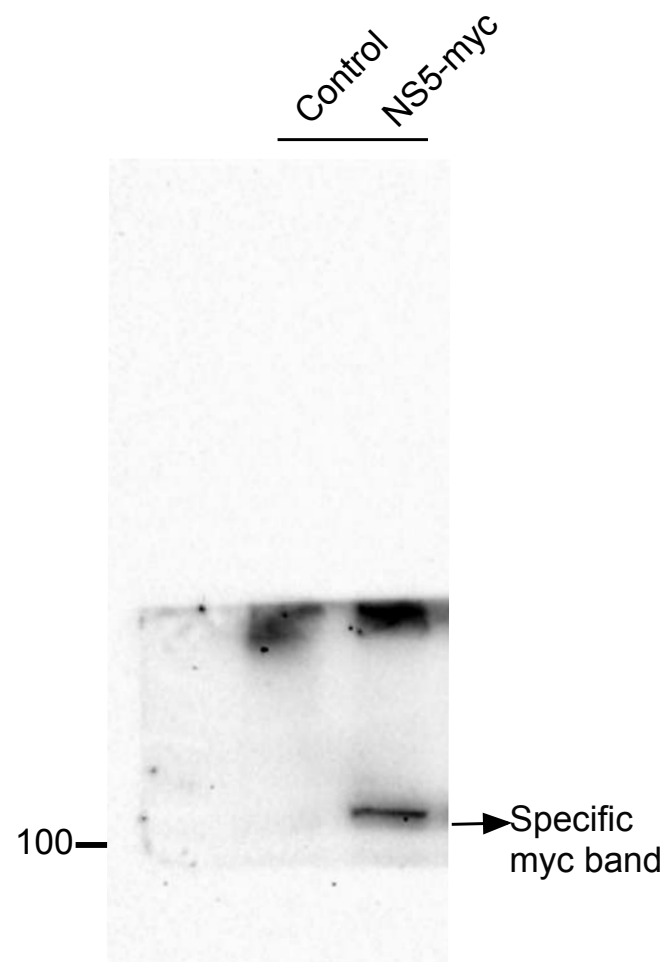

**Figure S2D.** Replicate 2 p62 complete gel

Western-blot associated with  
Figure S2D  
Pérez-Yanes, S., et al.

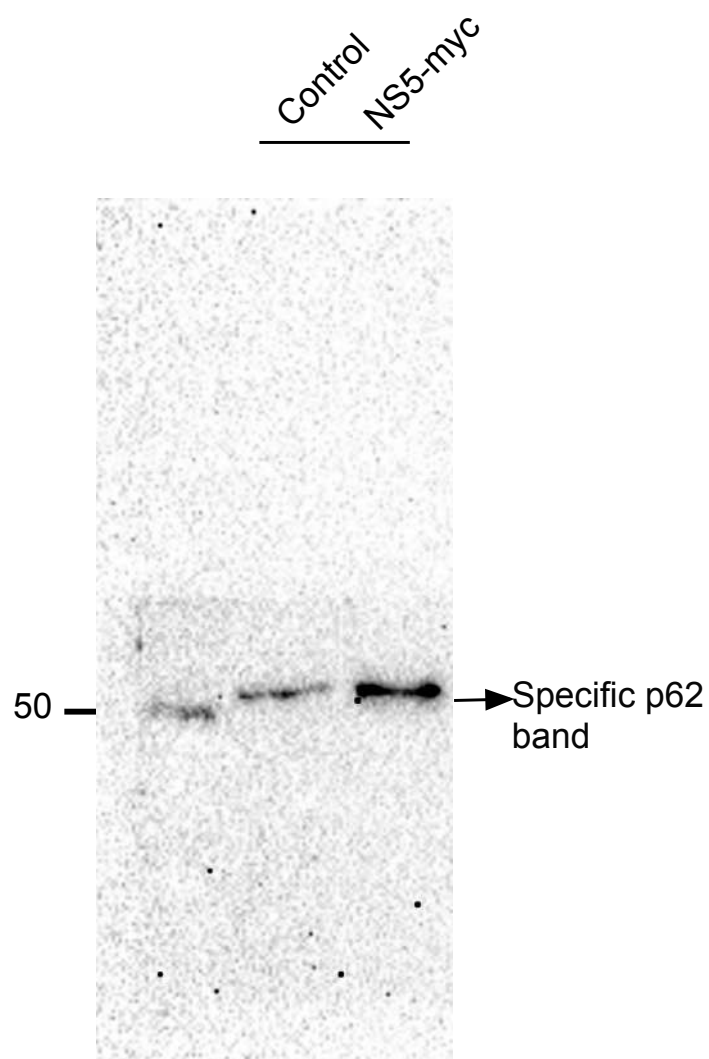

**Figure S2D.** Replicate 2 Total  $\alpha$ -Tubulin complete gel

Western-blot associated with  
Figure S2D  
Pérez-Yanes, S., et al.

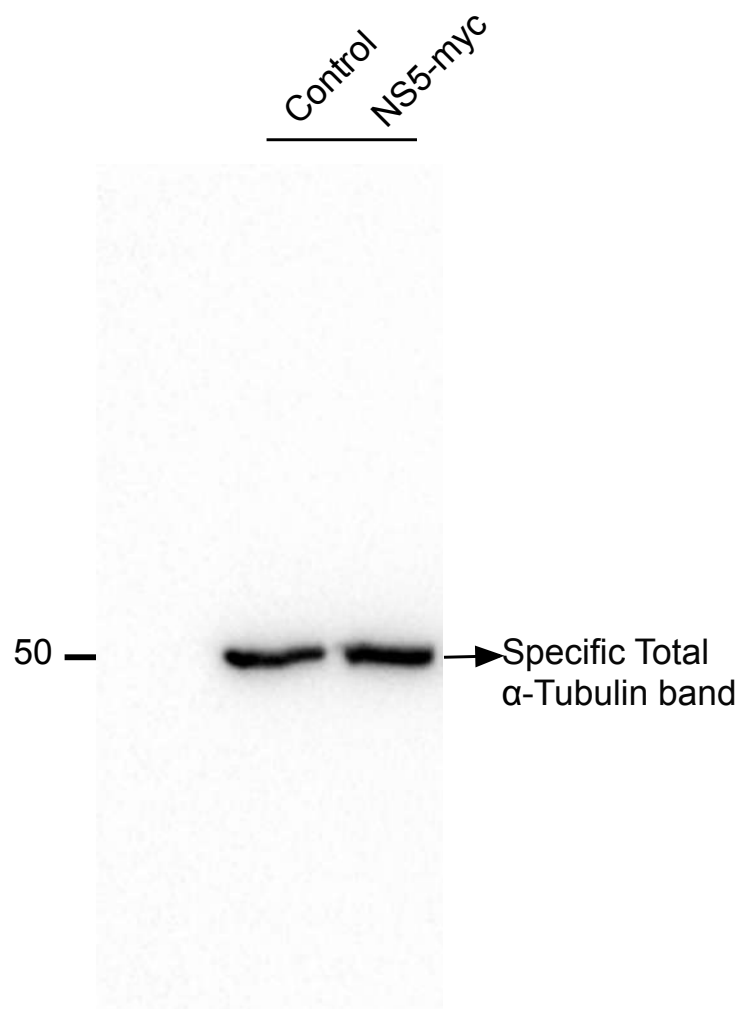



**Figure S2D.** Replicate 3 myc complete gel

Western-blot associated with  
Figure S2D  
Pérez-Yanes, S., et al.

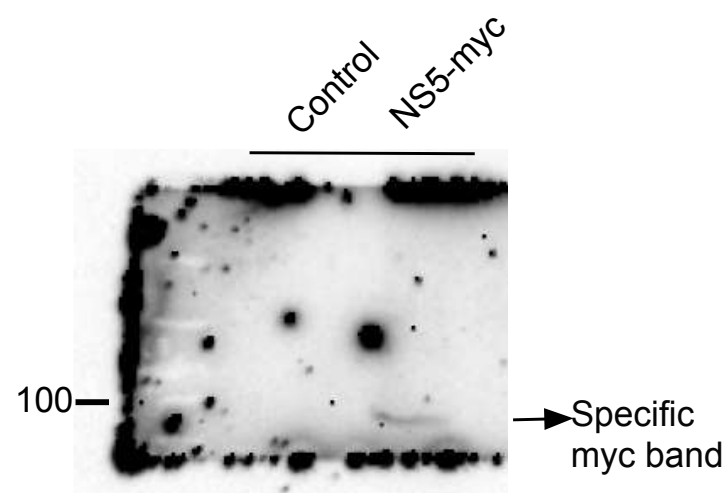

**Figure S2D.** Replicate 3 p62  
complete gel

Western-blot associated with  
Figure S2D  
Pérez-Yanes, S., et al.

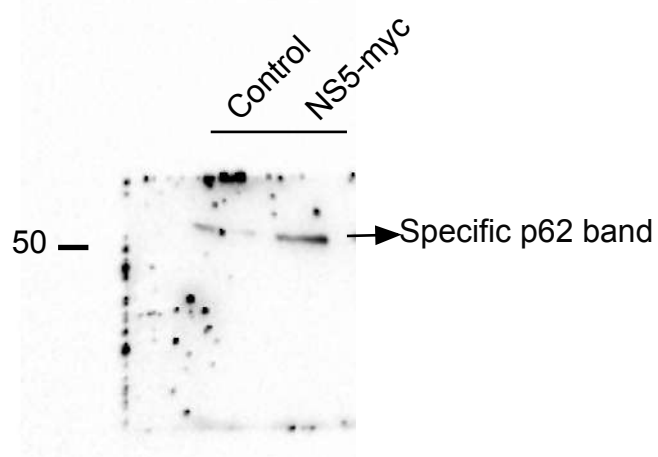

**Figure S2D.** Replicate 3 Total  $\alpha$ -Tubulin complete gel

Western-blot associated with  
Figure S2D  
Pérez-Yanes, S., et al.

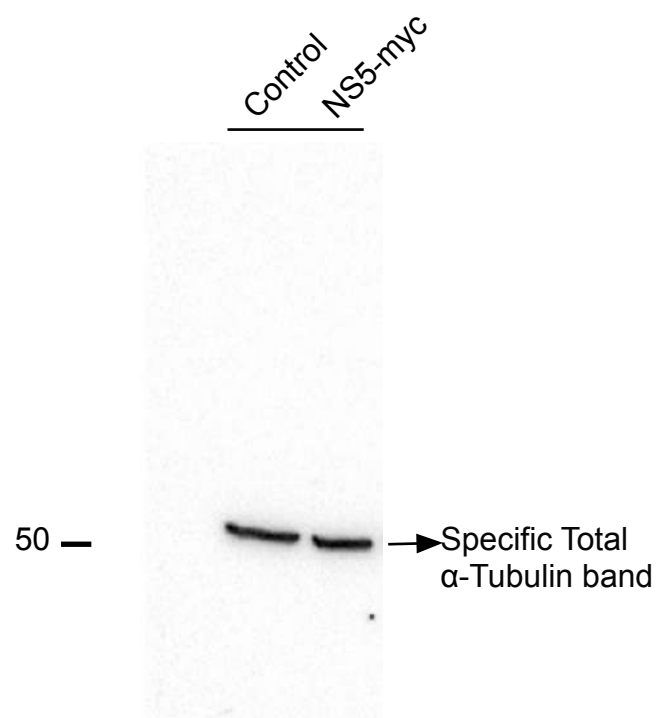

**Figure S2D.** Replicate 4 myc complete gel

Western-blot associated with  
Figure S2D  
Pérez-Yanes, S., et al.

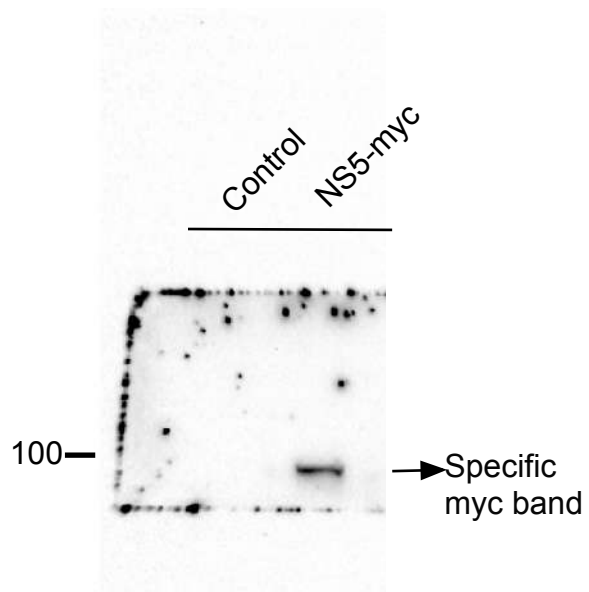

**Figure S2D.** Replicate 4 p62  
complete gel

Western-blot associated with  
Figure S2D  
Pérez-Yanes, S., et al.

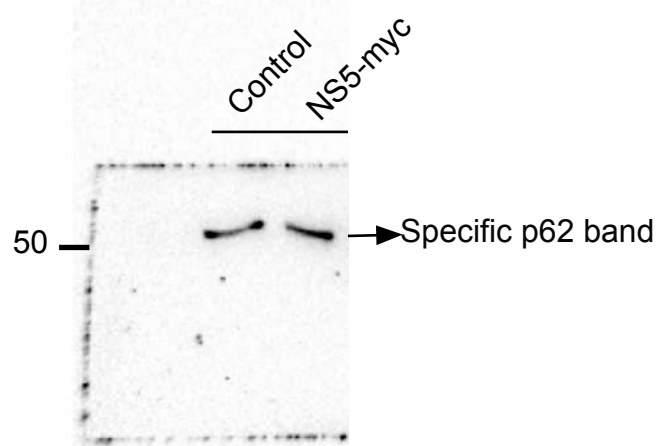

**Figure S2D.** Replicate 4 Total  $\alpha$ -Tubulin complete gel

Western-blot associated with  
Figure S2D  
Pérez-Yanes, S., et al.

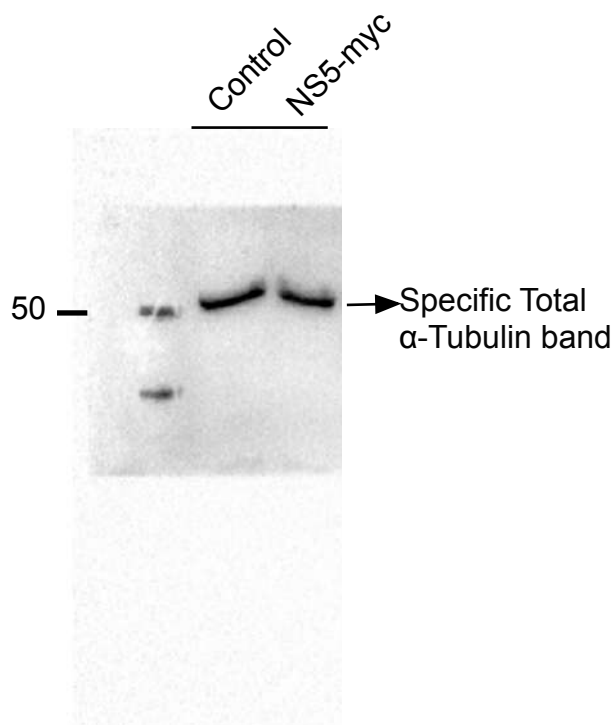

**Figure S2E.** Western-blot replicates associated with Figure 2E.

***Replicate 1 as figure format***

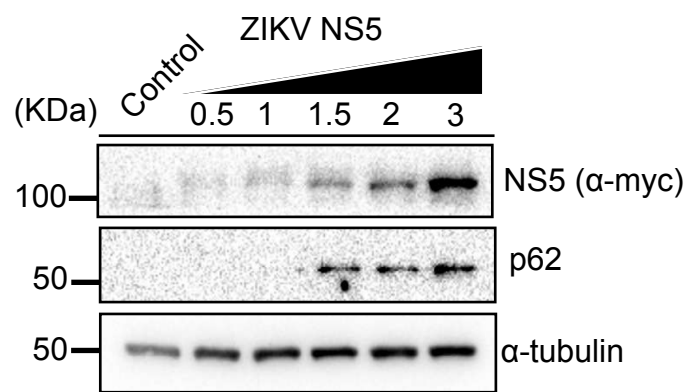

***Replicate 2 as figure format***

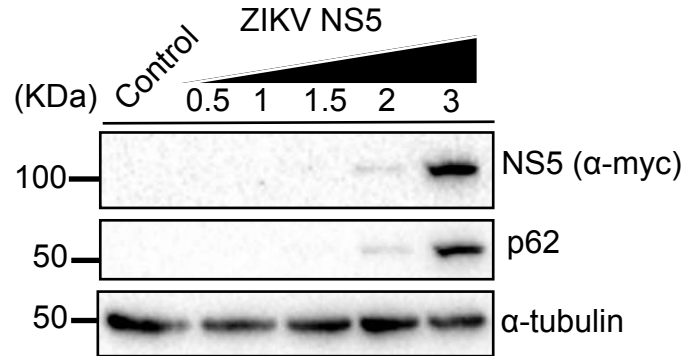

***Replicate 3 as figure format***

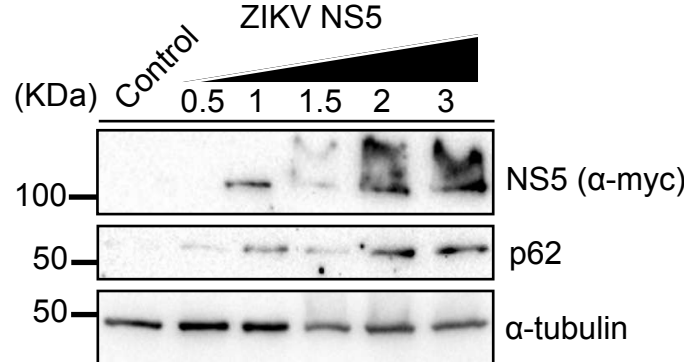

**Figure S2E.** Replicate 1 myc complete gel

Western-blot associated with  
Figure S2E  
Pérez-Yanes, S., et al.

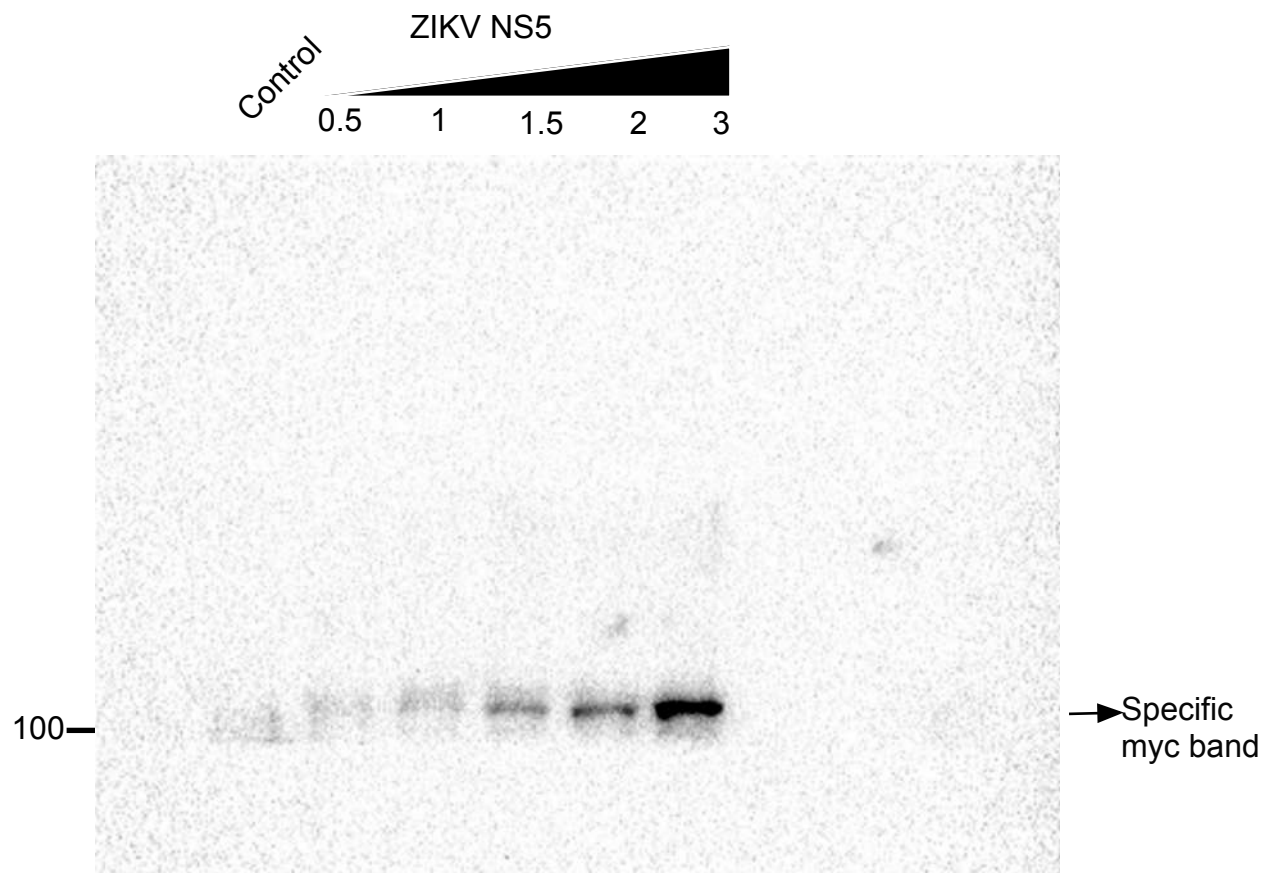



**Figure S2E.** Replicate 1 p62 complete gel

Western-blot associated with Figure S2E  
Pérez-Yanes, S., et al.

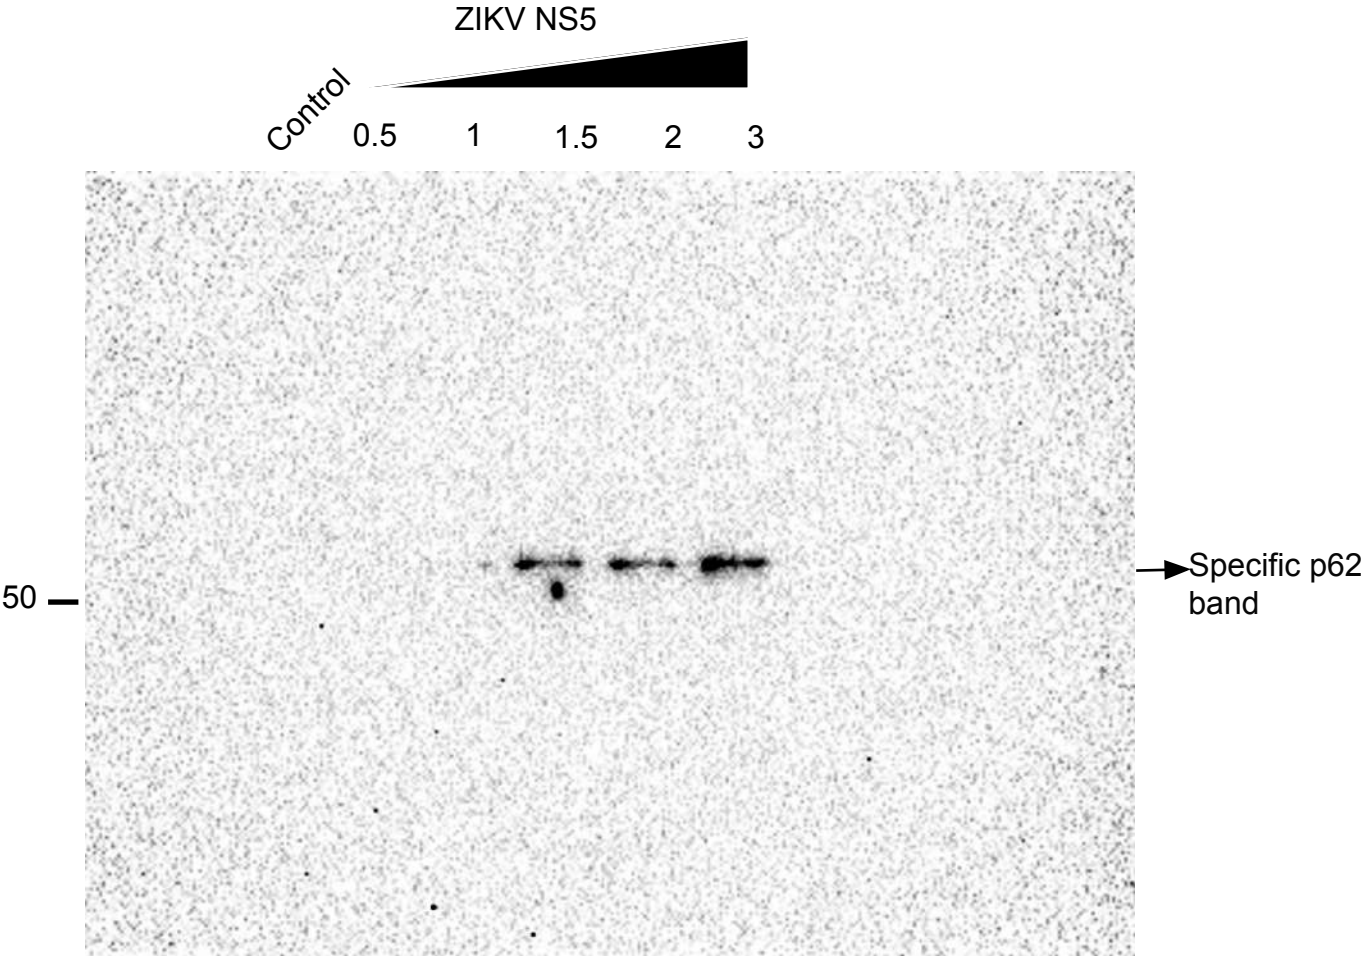

**Figure S2E.** Replicate 1 Total  $\alpha$ -Tubulin complete gel

Western-blot associated with Figure S2E  
Pérez-Yanes, S., et al.

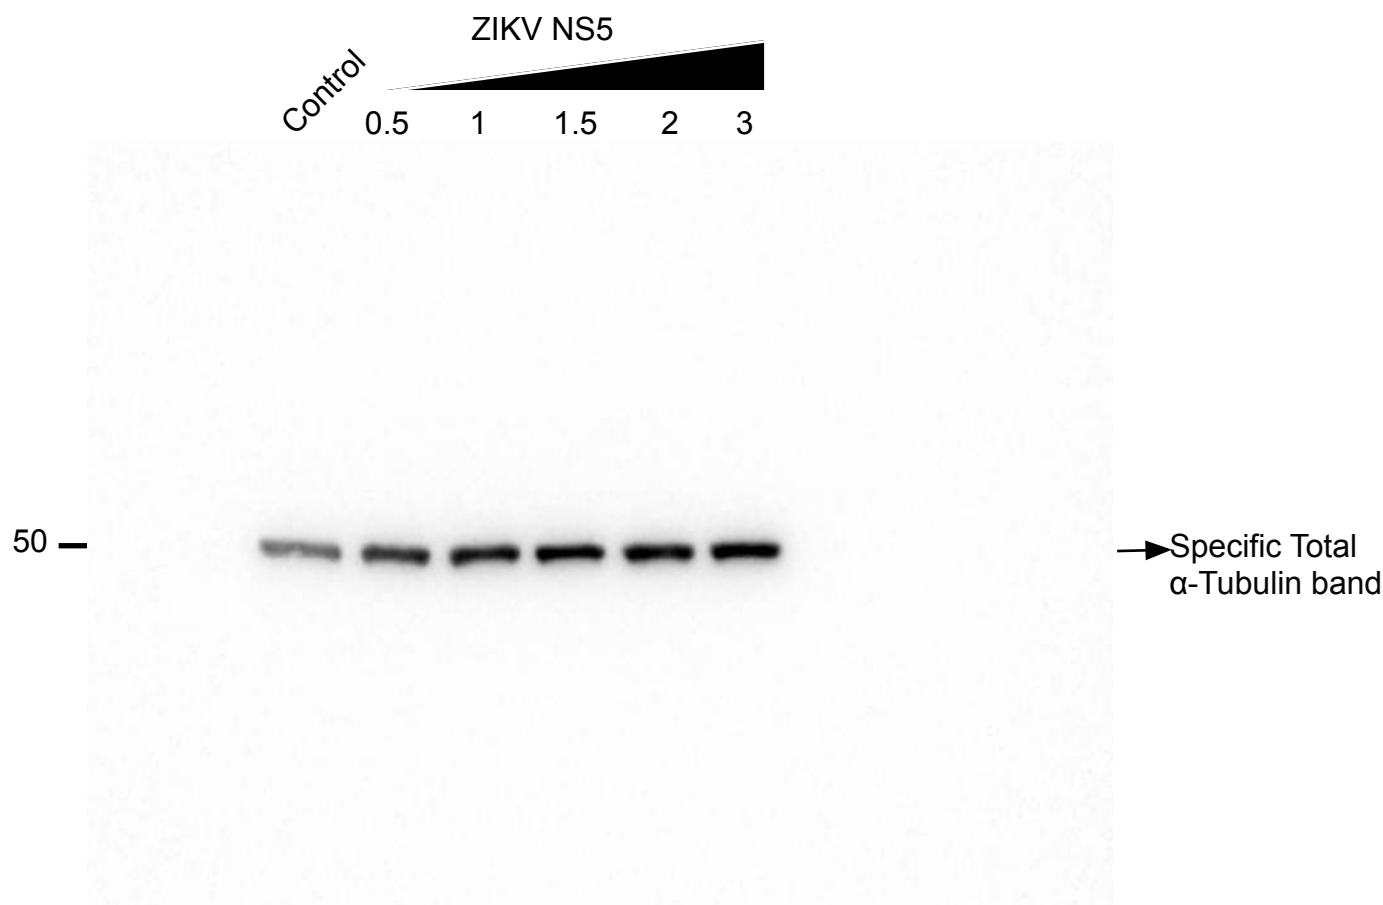

**Figure S2E.** Replicate 2 myc complete gel

Western-blot associated with Figure S2E  
Pérez-Yanes, S., et al.

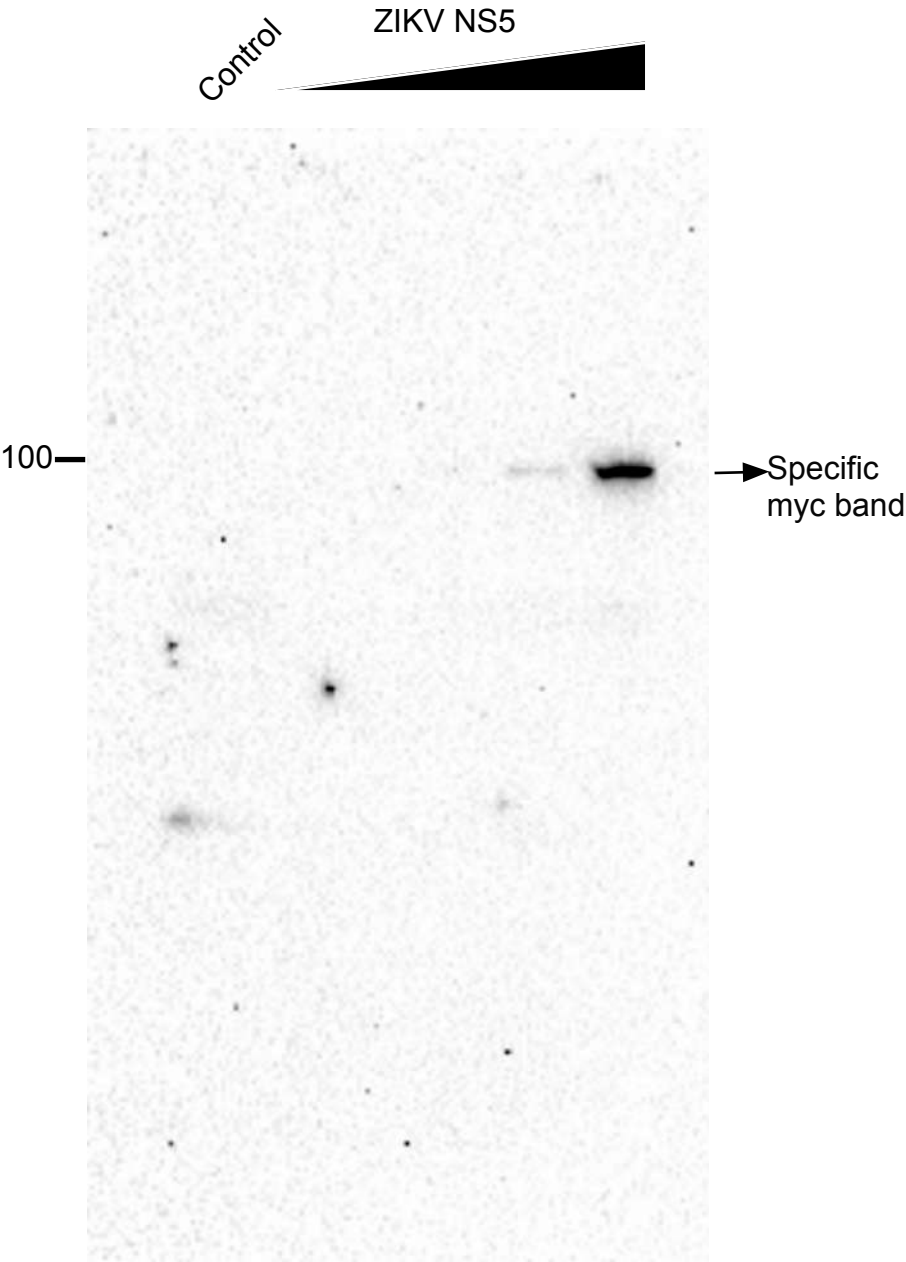

**Figure S2E.** Replicate 2 p62 complete gel

Western-blot associated with Figure S2E  
Pérez-Yanes, S., et al.

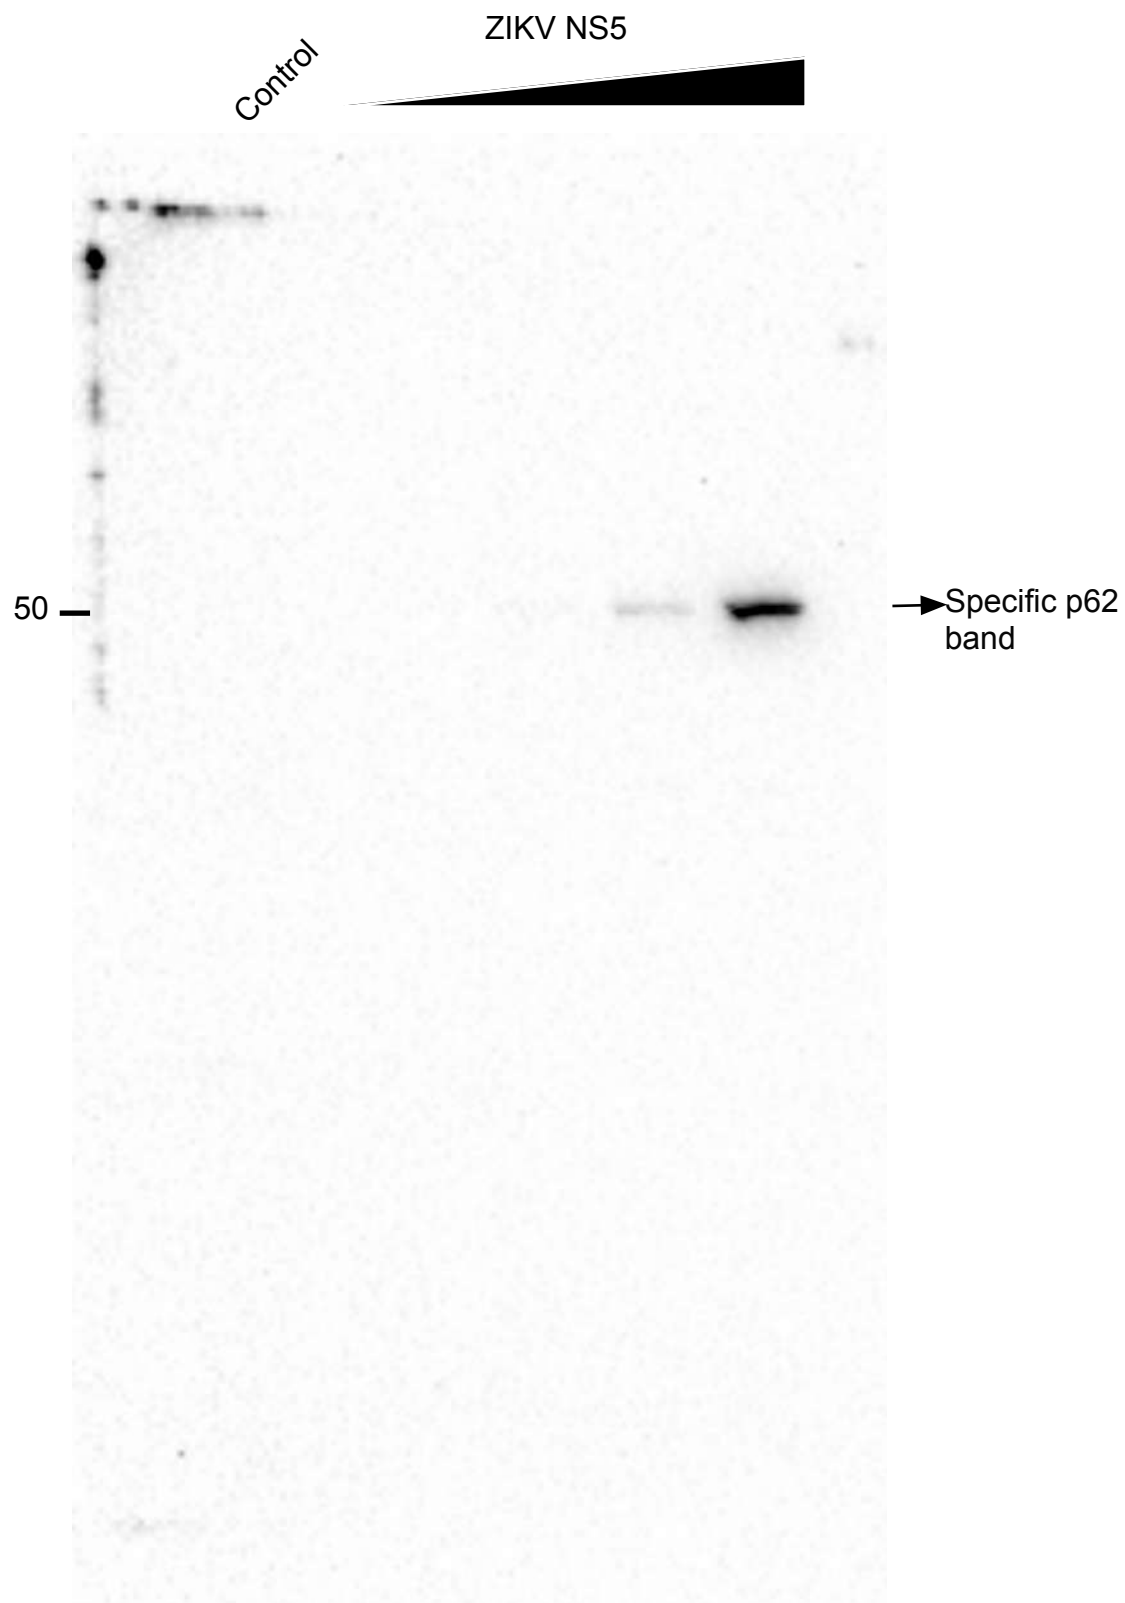

**Figure S2E.** Replicate 2 Total  $\alpha$ -Tubulin complete gel

Western-blot associated with  
Figure S2E  
Pérez-Yanes, S., et al.

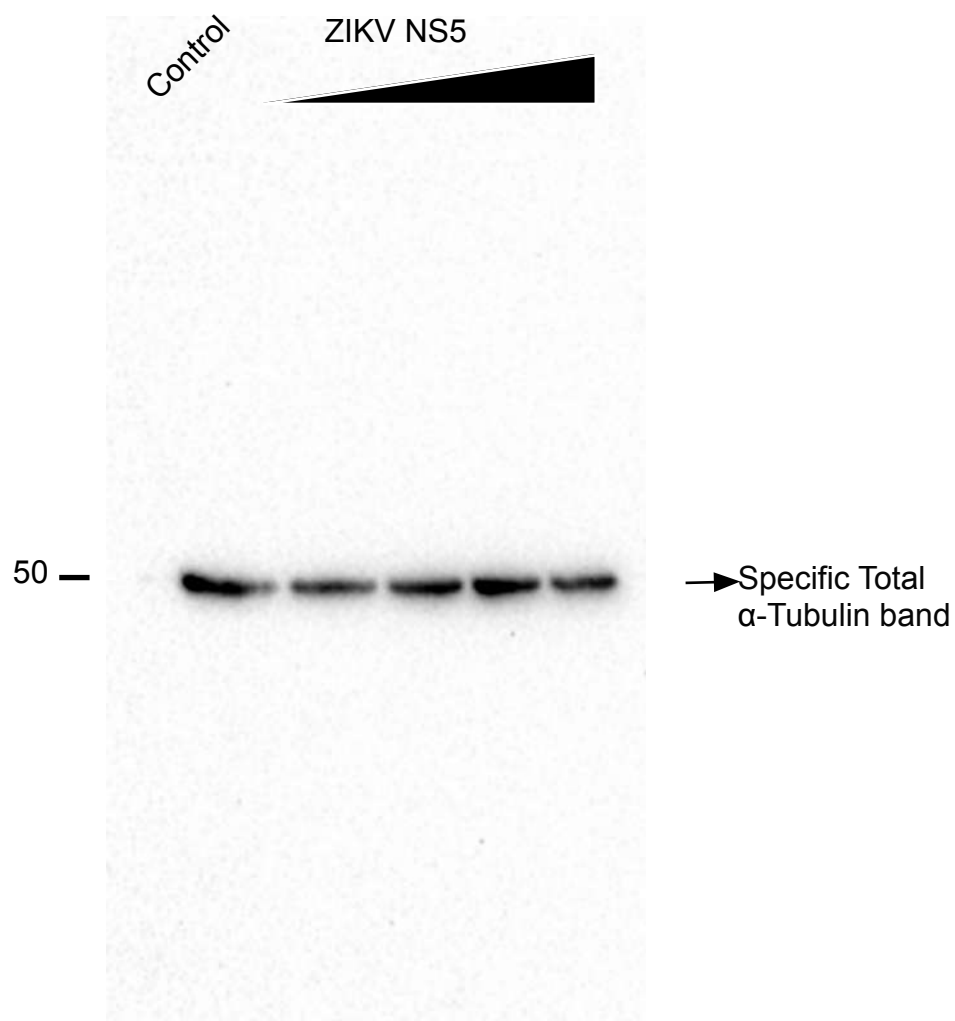

**Figure S2E.** Replicate 3 myc complete gel

Western-blot associated with  
Figure S2E  
Pérez-Yanes, S., et al.

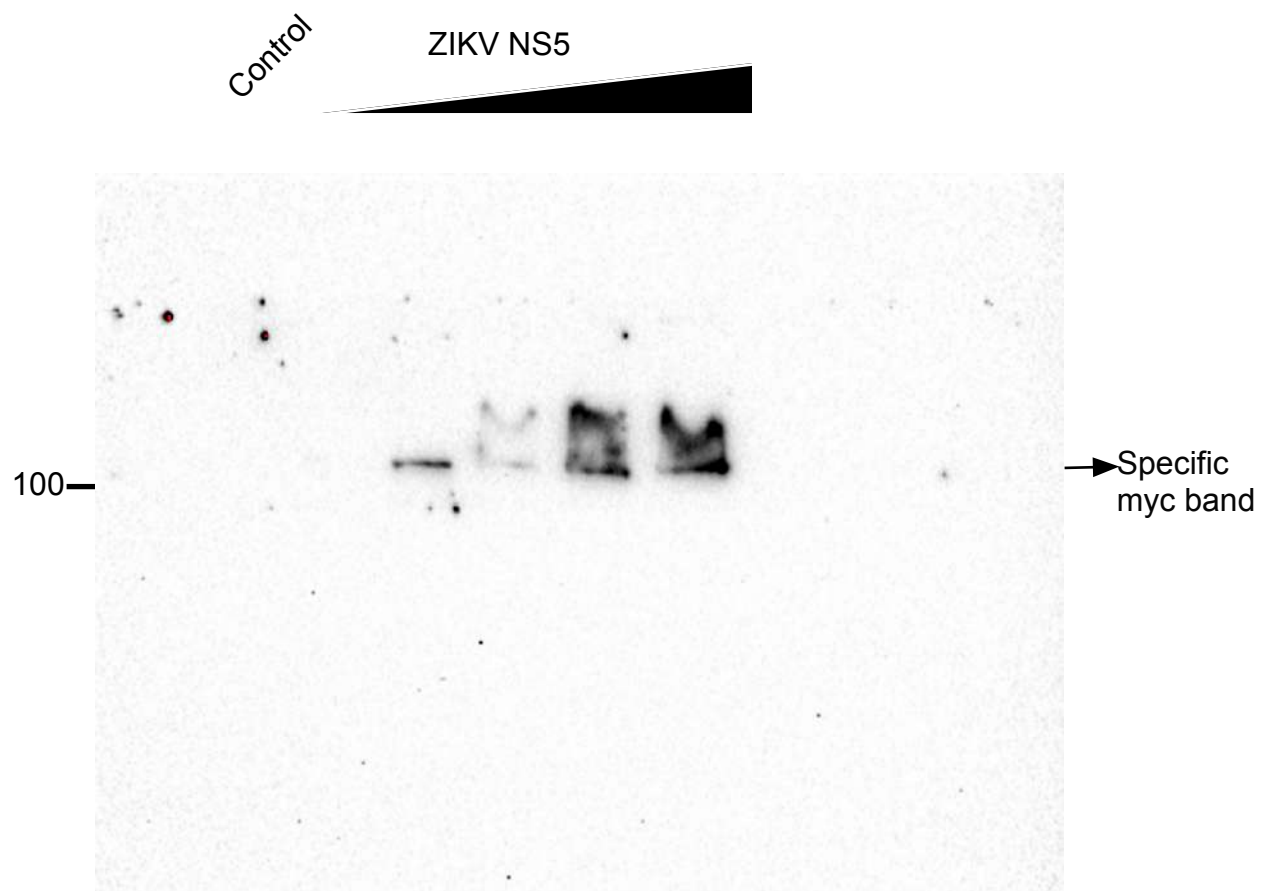

**Figure S2E.** Replicate 3 p62  
complete gel

Western-blot associated with  
Figure S2E  
Pérez-Yanes, S., et al.

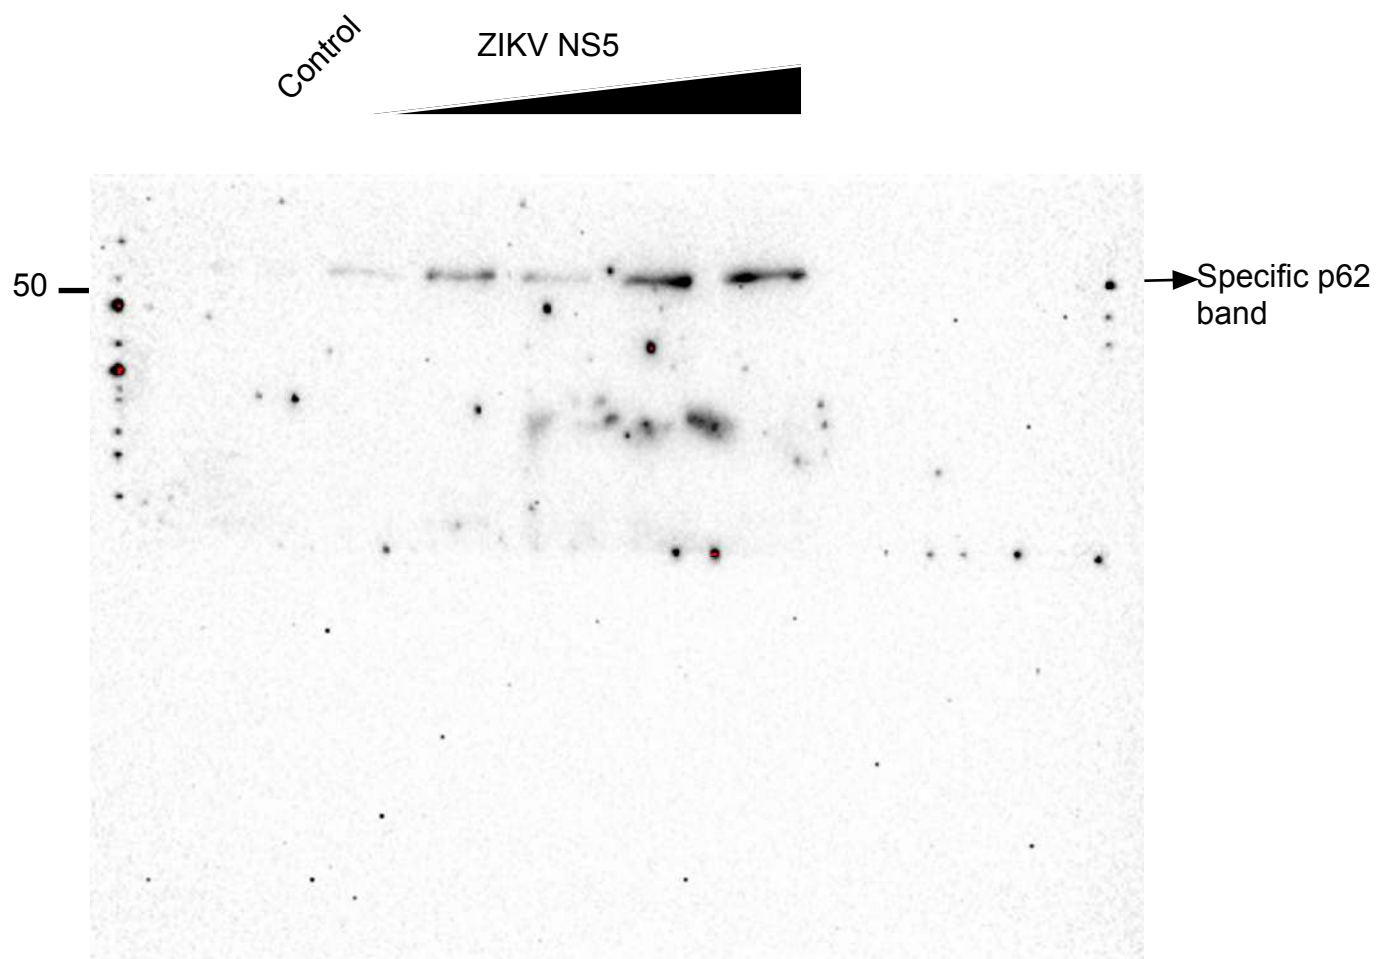

**Figure S2E.** Replicate 3 Total  $\alpha$ -Tubulin complete gel

Western-blot associated with  
Figure S2E  
Pérez-Yanes, S., et al.

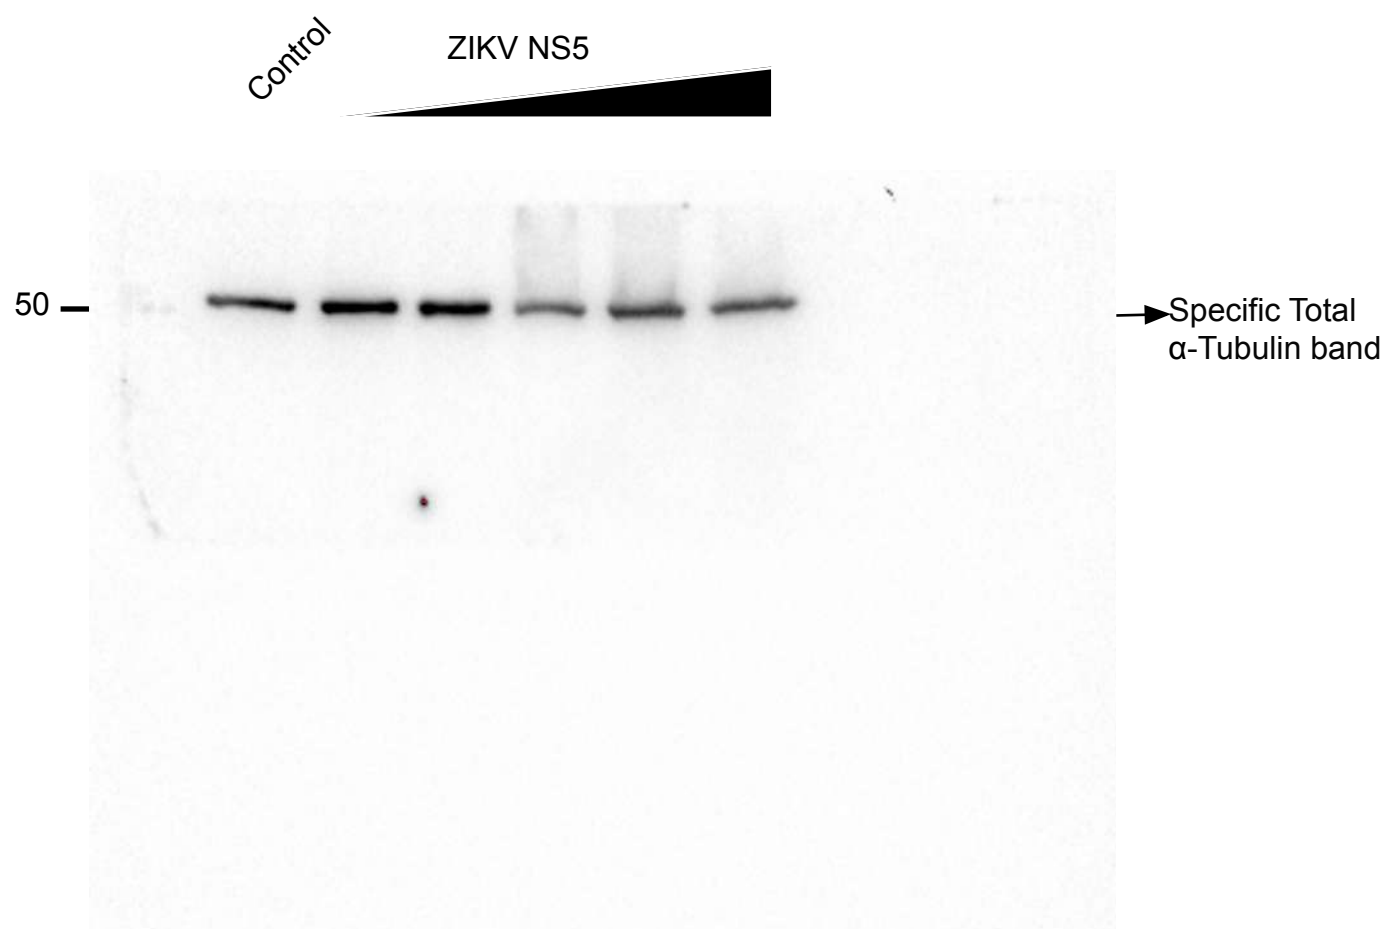



**Figura S3A.** Western-blot replicates associated with Figure 3A.

**Replicate 1 as figure format**

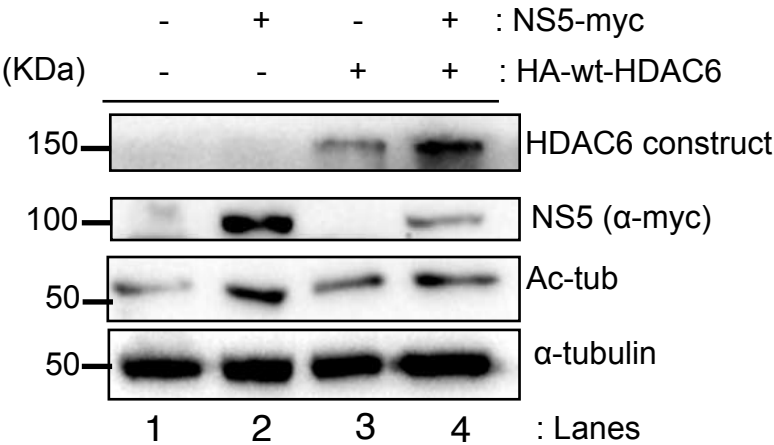

**Replicate 2 as figure format**

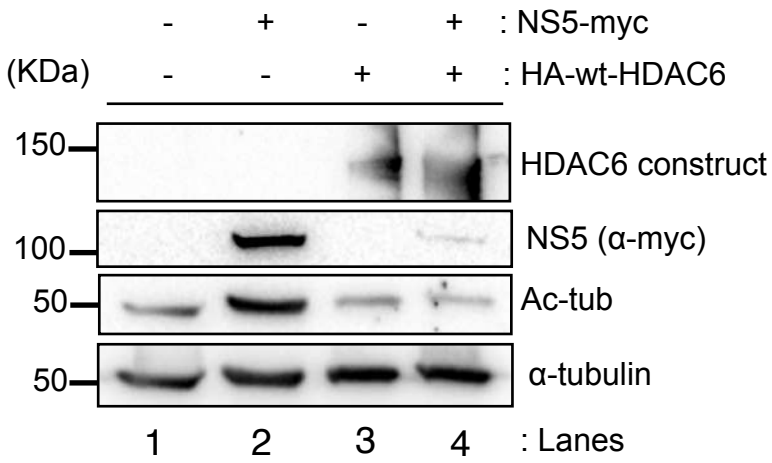

**Replicate 3 as figure format**

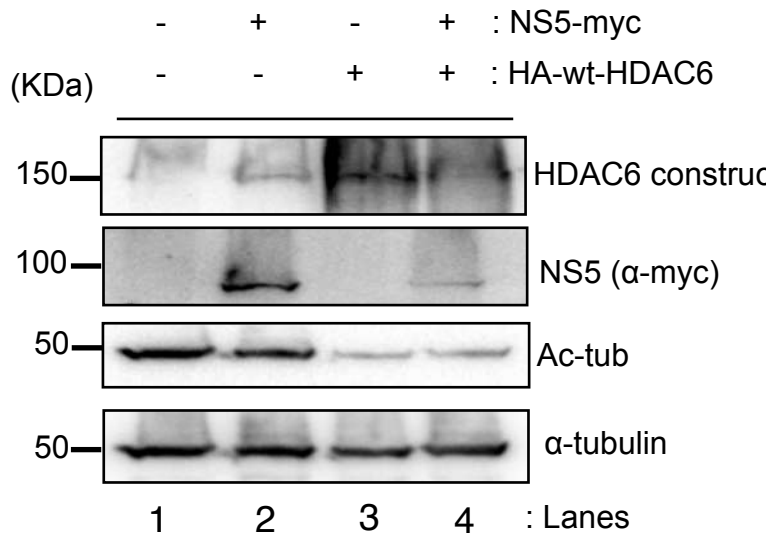

**Replicate 4 as figure format**

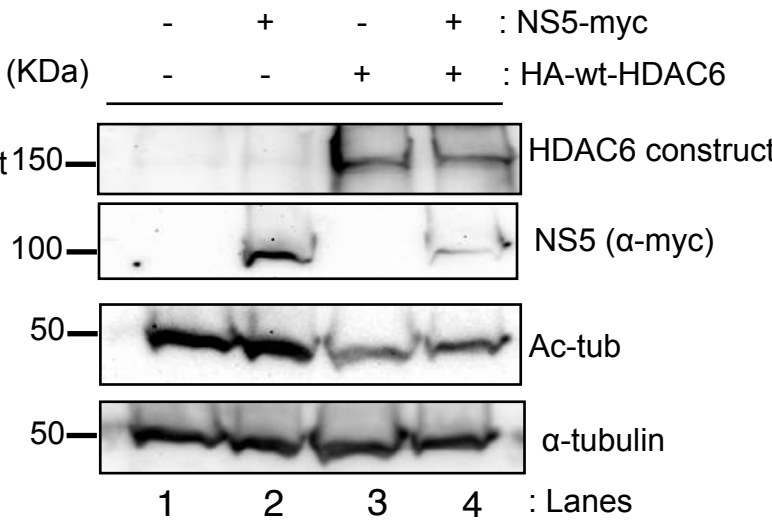

**Figure S3A.** Replicate 1 HDAC6 complete gel

Western-blot associated with Figure 3A  
Pérez-Yanes, S., et al.

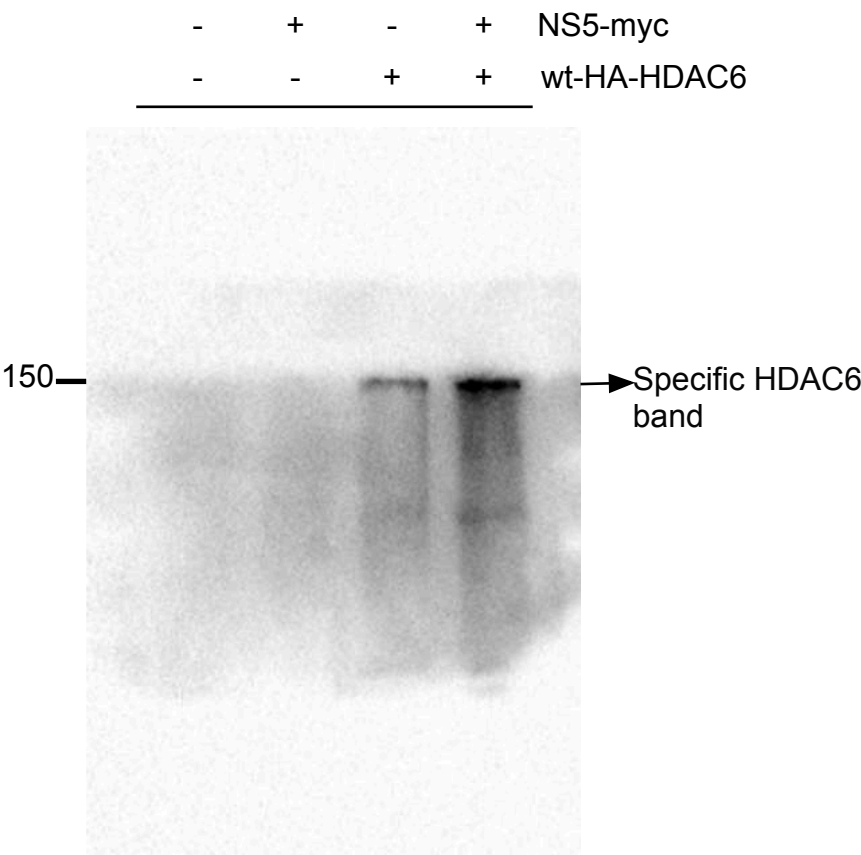

**Figure S3A.** Replicate 1 myc complete gel

Western-blot associated with Figure 3A  
Pérez-Yanes, S., et al.

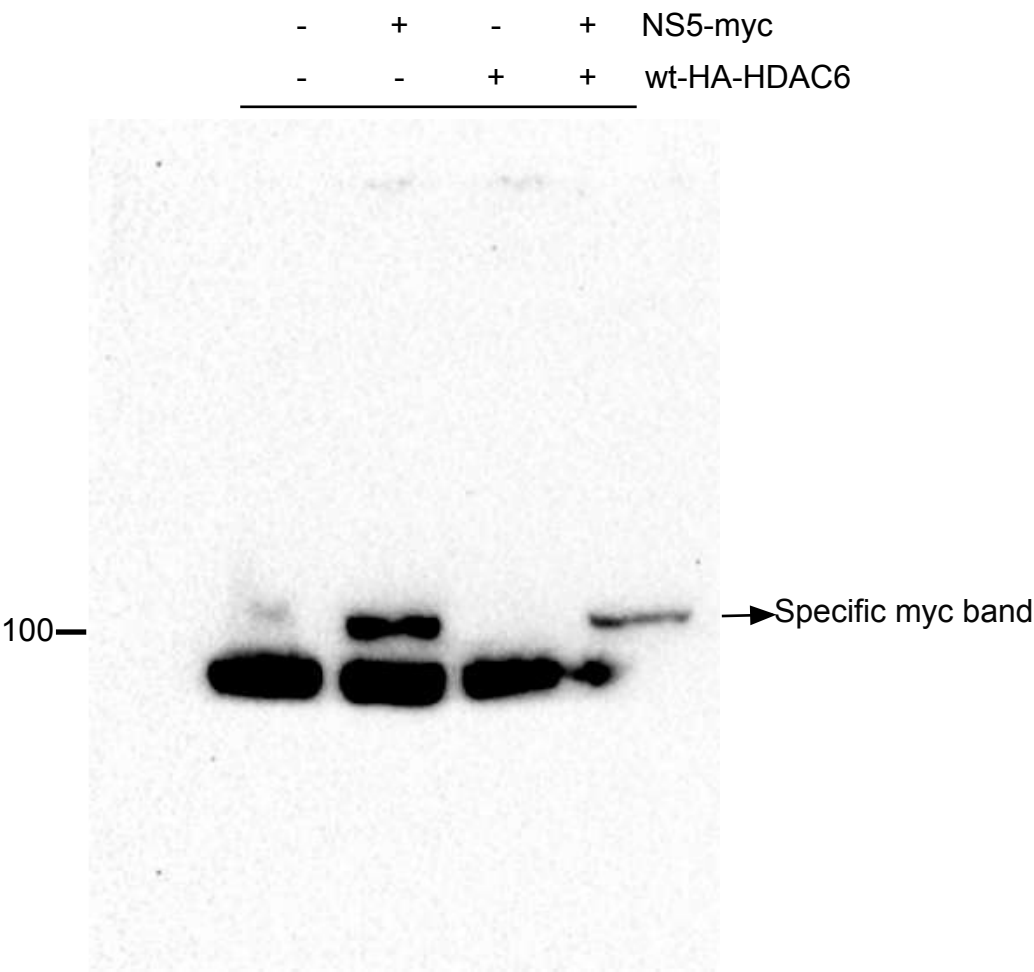

**Figure S3A.** Replicate 1 Total  $\alpha$ -Tubulin complete gel

Western-blot associated with Figure 3A  
Pérez-Yanes, S., et al.

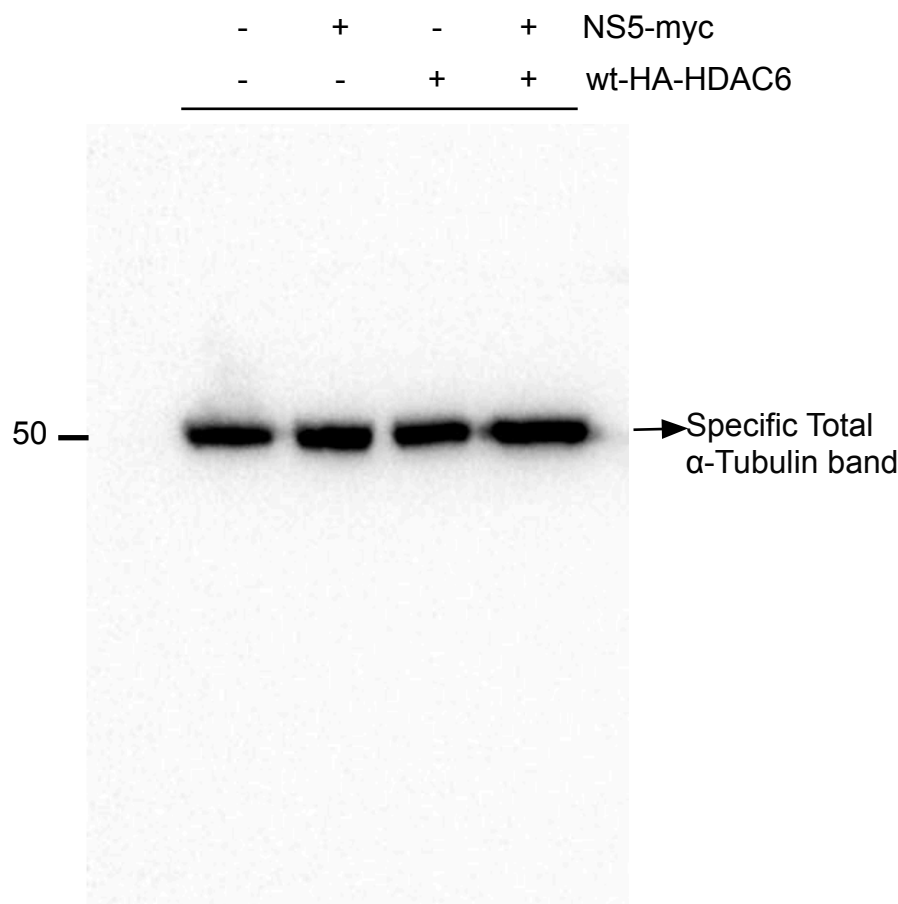

**Figure S3A.** *Replicate 1 Acetylated  $\alpha$ -Tubulin Western-blot associated with Figure 3A*  
*Pérez-Yanes, S., et al.*

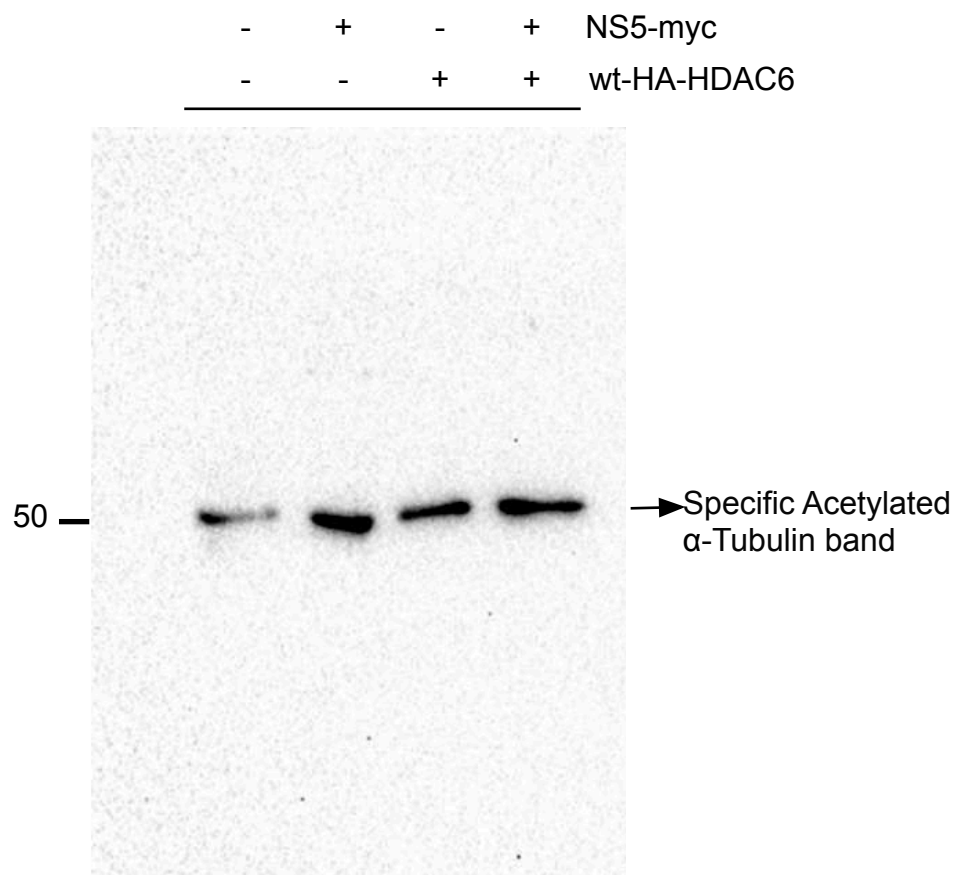

**Figure S3A.** Replicate 2 HDAC6 complete gel

Western-blot associated with Figure 3A  
Pérez-Yanes, S., et al.

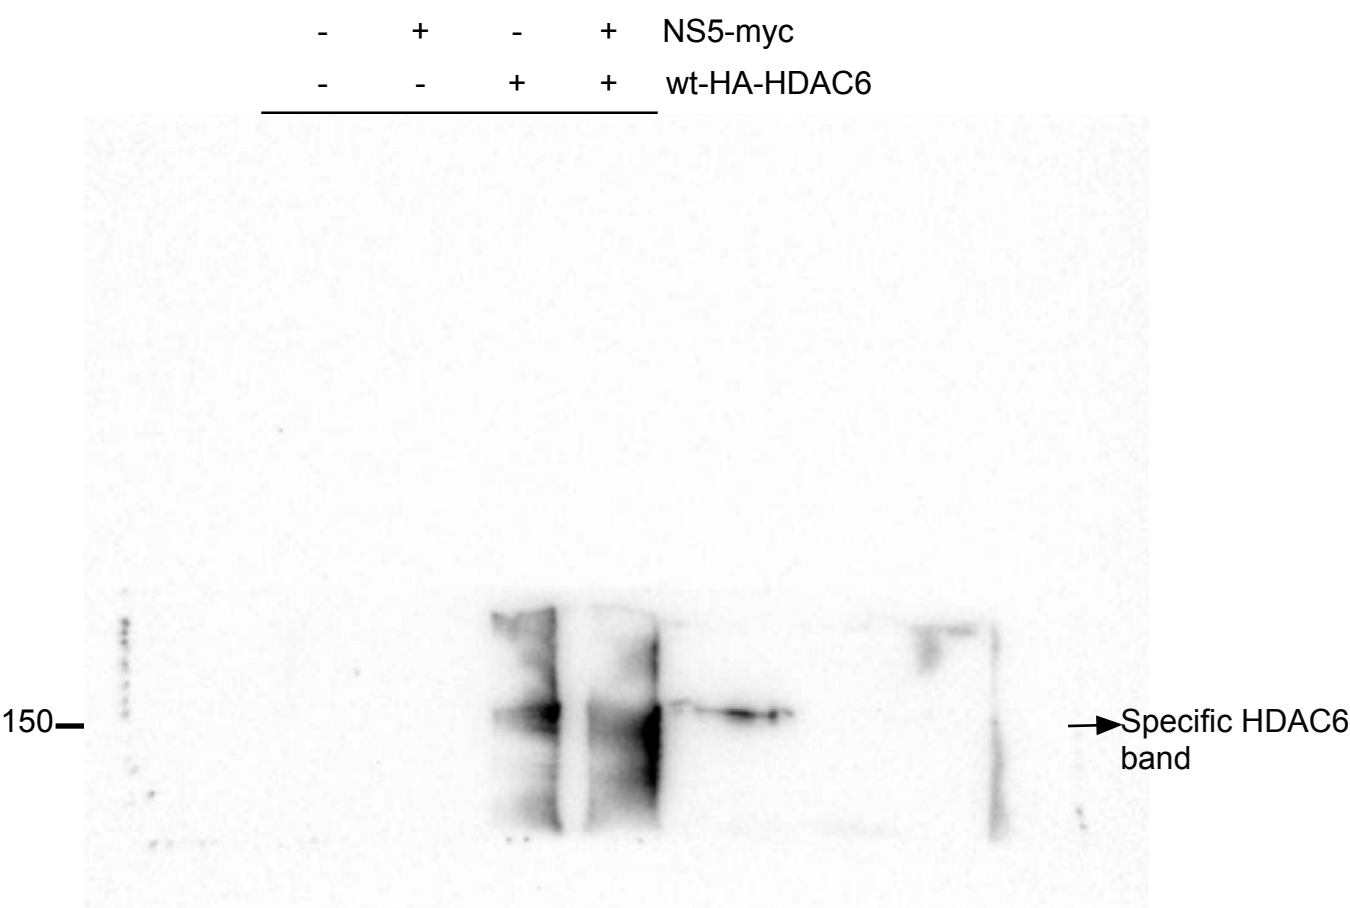

**Figure S3A.** Replicate 2 myc complete gel

Western-blot associated with Figure 3A  
Pérez-Yanes, S., et al.

|   |   |   |   |             |
|---|---|---|---|-------------|
| - | + | - | + | NS5-myc     |
| - | - | + | + | wt-HA-HDAC6 |

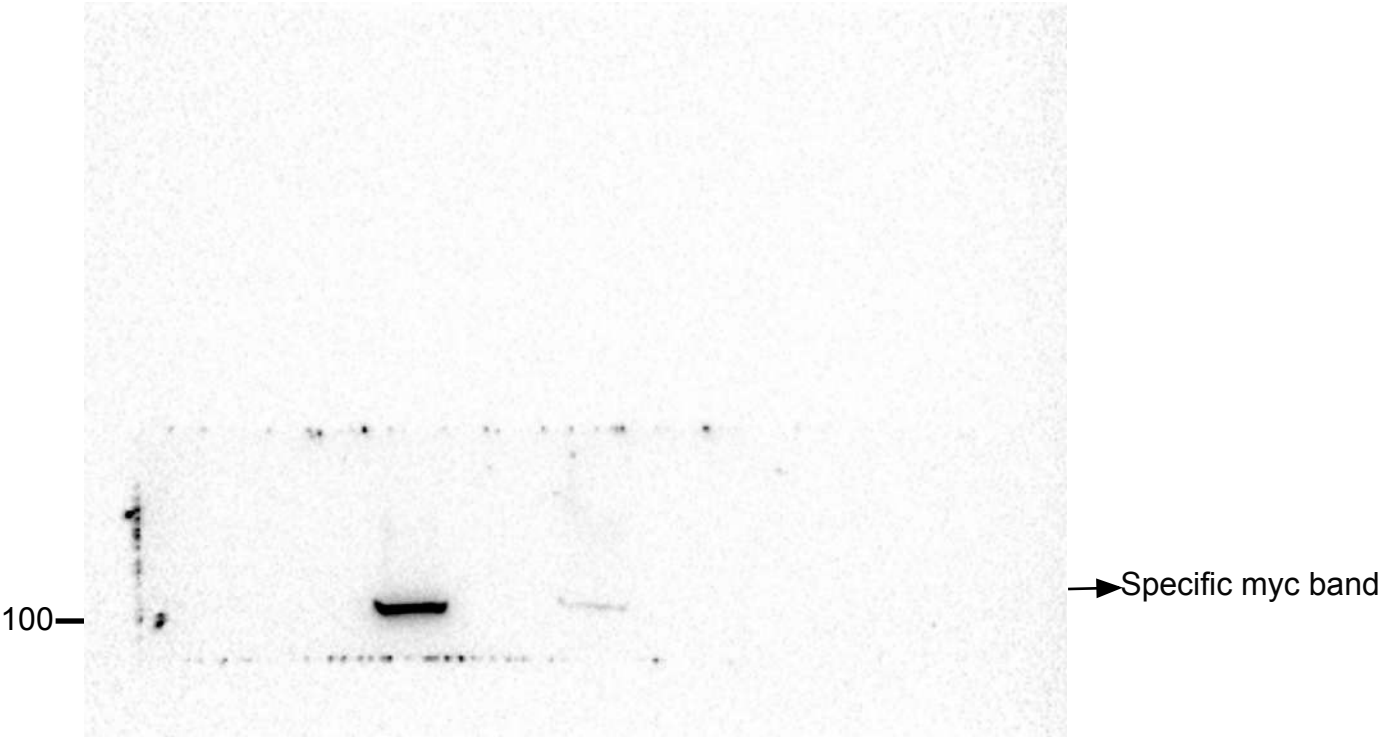

**Figure S3A.** Replicate 2 Total  $\alpha$ -Tubulin complete gel

Western-blot associated with Figure 3A  
Pérez-Yanes, S., et al.

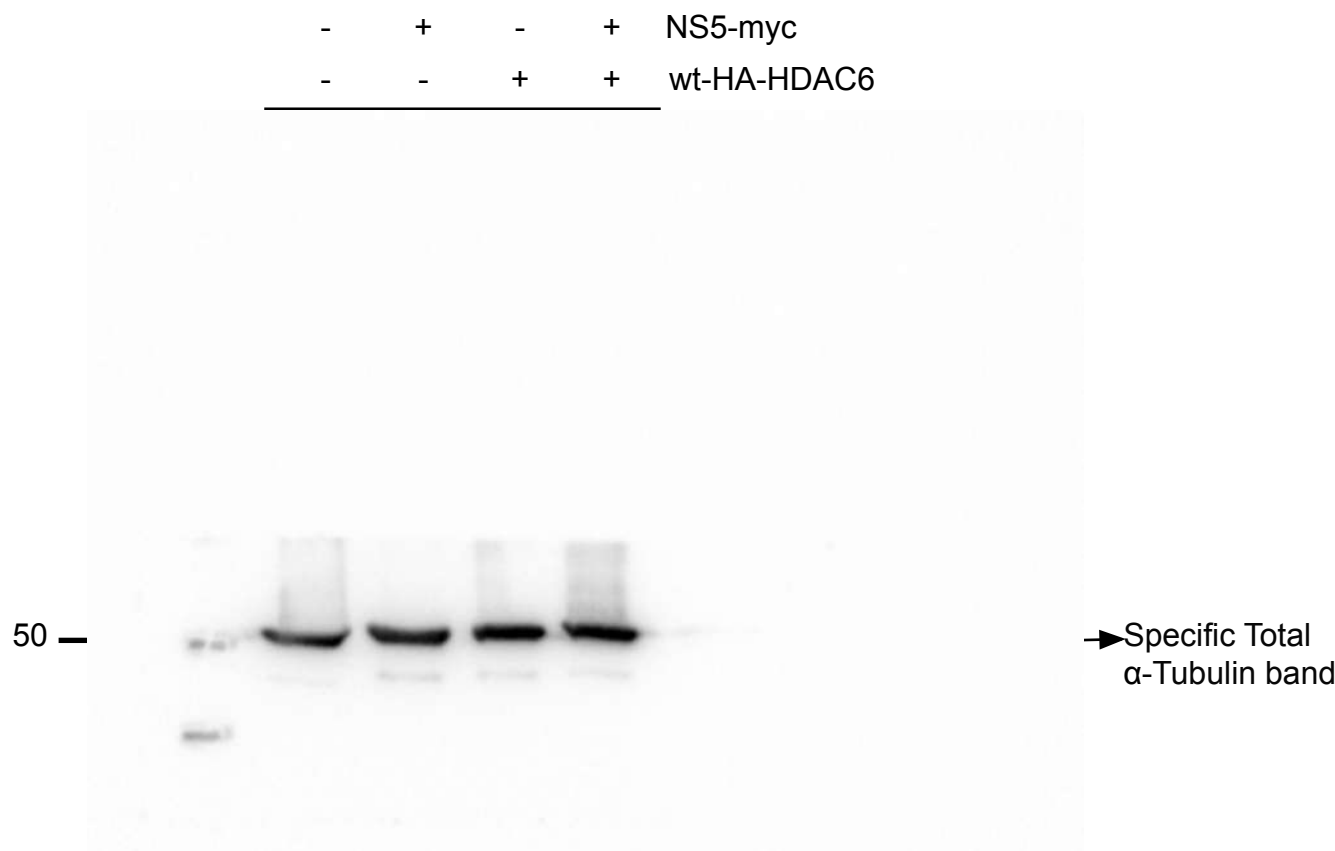



**Figure S3A.** *Replicate 2 Acetylated  $\alpha$ -Tubulin Western-blot associated with Figure 3A*  
*Pérez-Yanes, S., et al.*

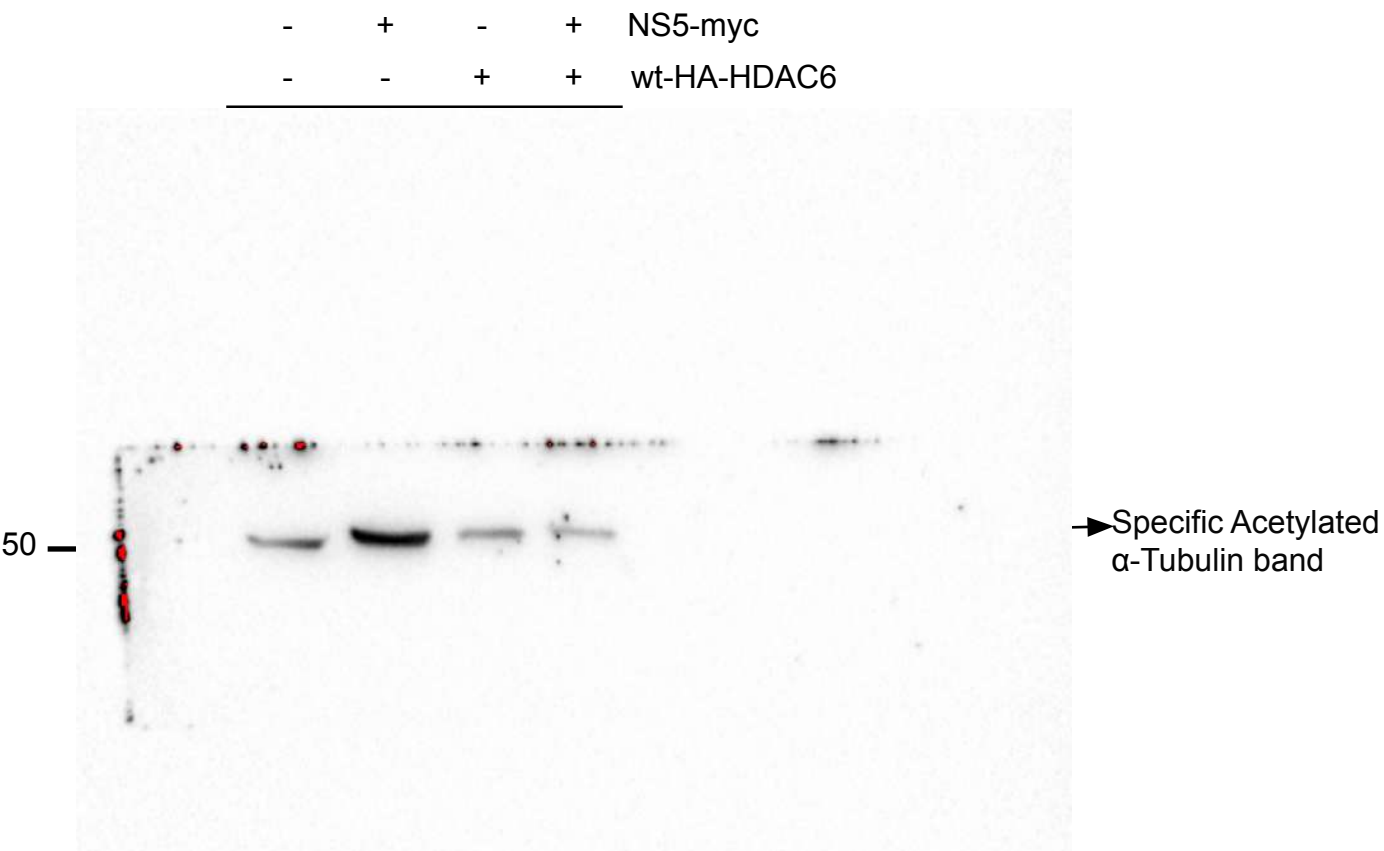

**Figure S3A.** Replicate 3 HDAC6 complete gel

Western-blot associated with Figure 3A  
Pérez-Yanes, S., et al.

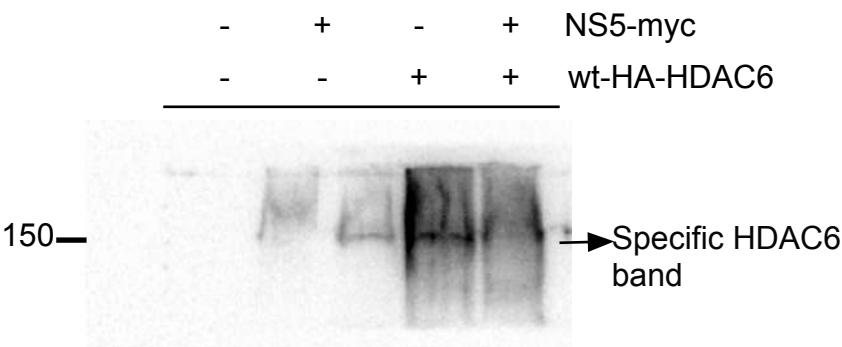

**Figure S3A.** Replicate 3 myc complete gel

Western-blot associated with Figure 3A  
Pérez-Yanes, S., et al.

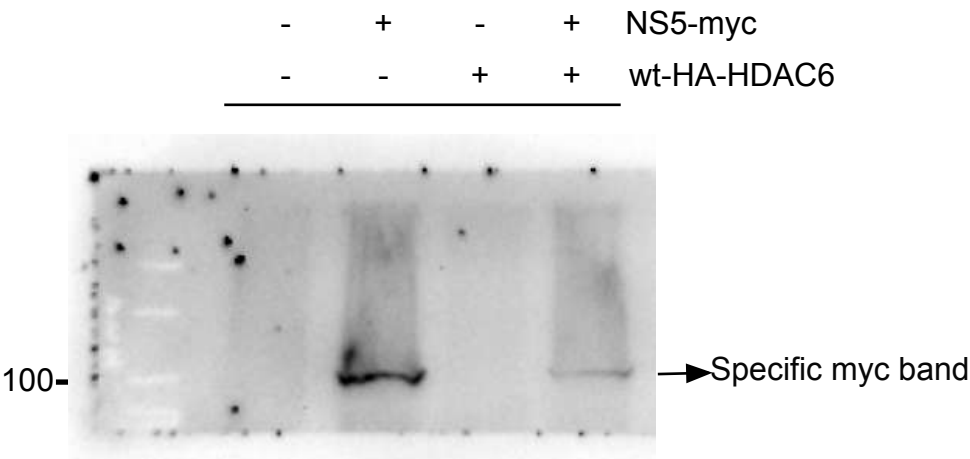

**Figure S3A.** Replicate 3 Total  $\alpha$ -Tubulin complete gel

Western-blot associated with Figure 3A  
Pérez-Yanes, S., et al.

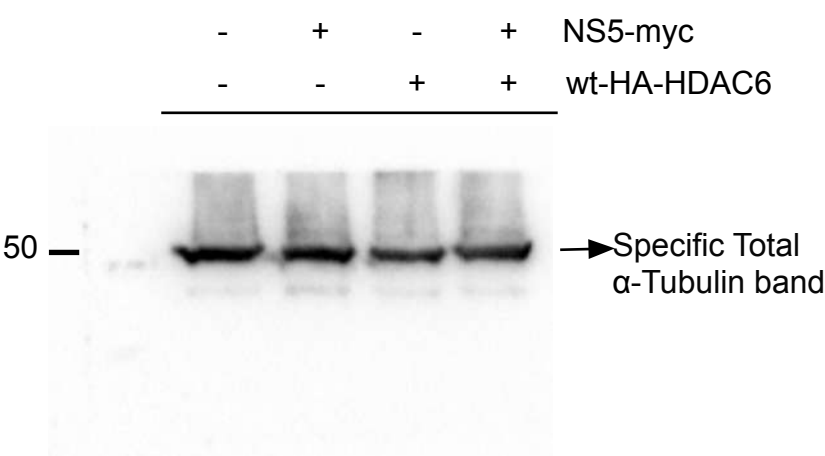

**Figure S3A.** *Replicate 3 Acetylated  $\alpha$ -Tubulin Western-blot associated with Figure 3A*  
*Pérez-Yanes, S., et al.*

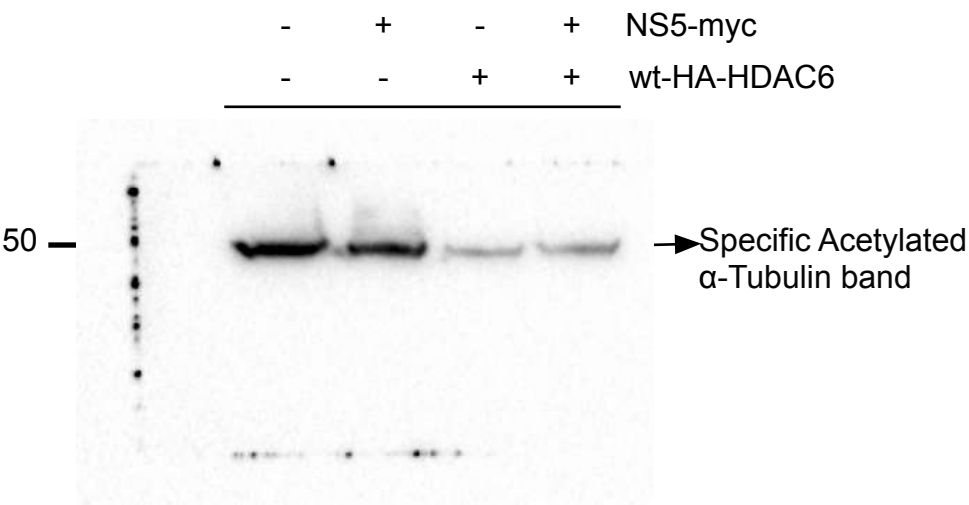

**Figure S3A.** Replicate 4 HDAC6 complete gel

Western-blot associated with Figure 3A  
Pérez-Yanes, S., et al.

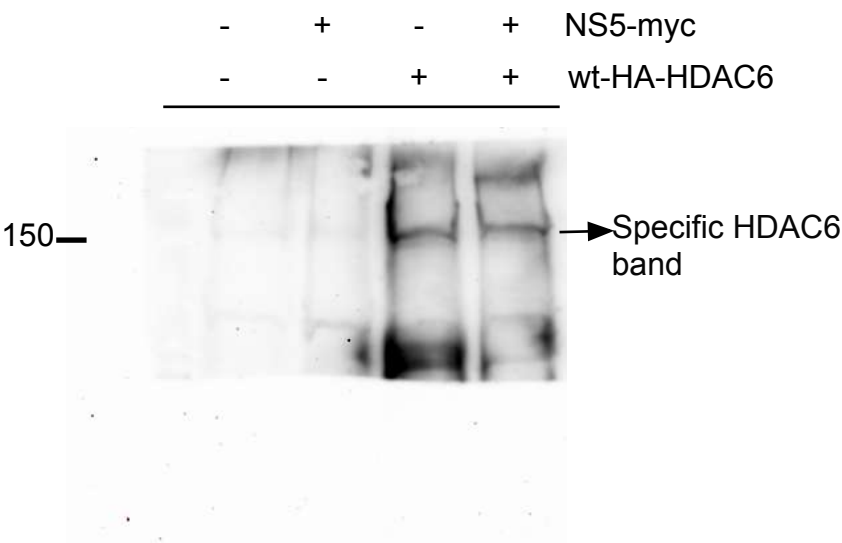

**Figure S3A.** Replicate 4 myc complete gel

Western-blot associated with Figure 3A  
Pérez-Yanes, S., et al.

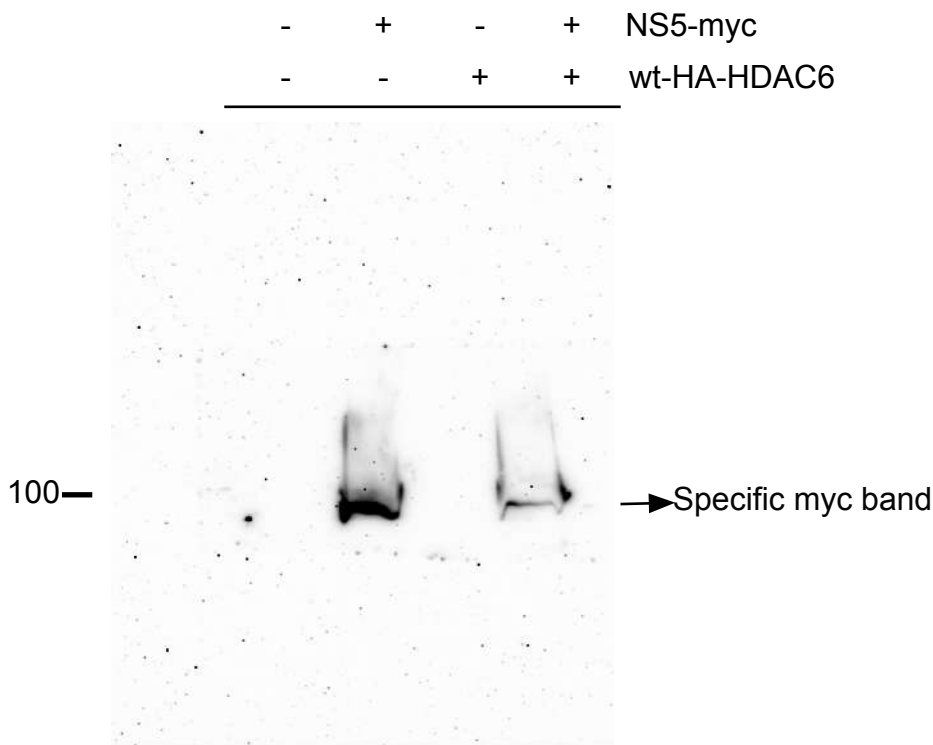

**Figure S3A.** Replicate 4 Total  $\alpha$ -Tubulin complete gel

Western-blot associated with Figure 3A  
Pérez-Yanes, S., et al.

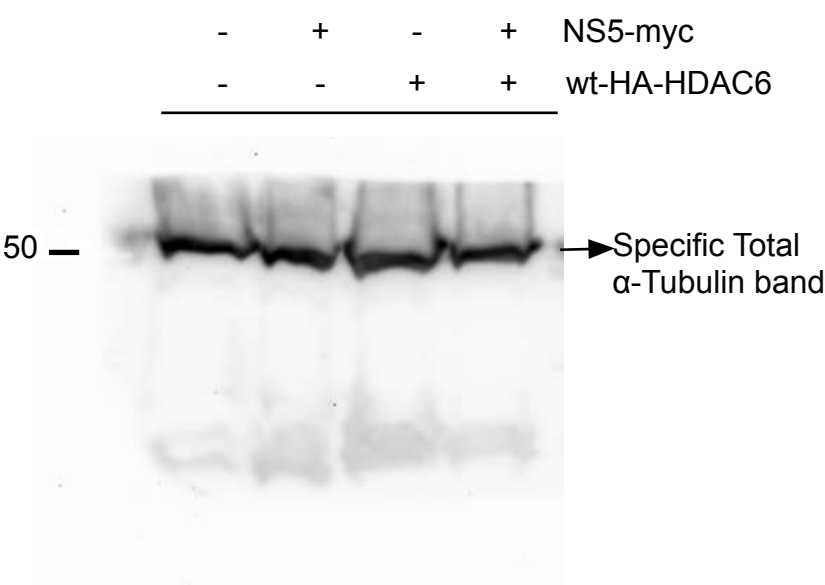



**Figure S3A.** *Replicate 4 Acetylated  $\alpha$ -Tubulin Western-blot associated with Figure 3A*  
*Pérez-Yanes, S., et al.*

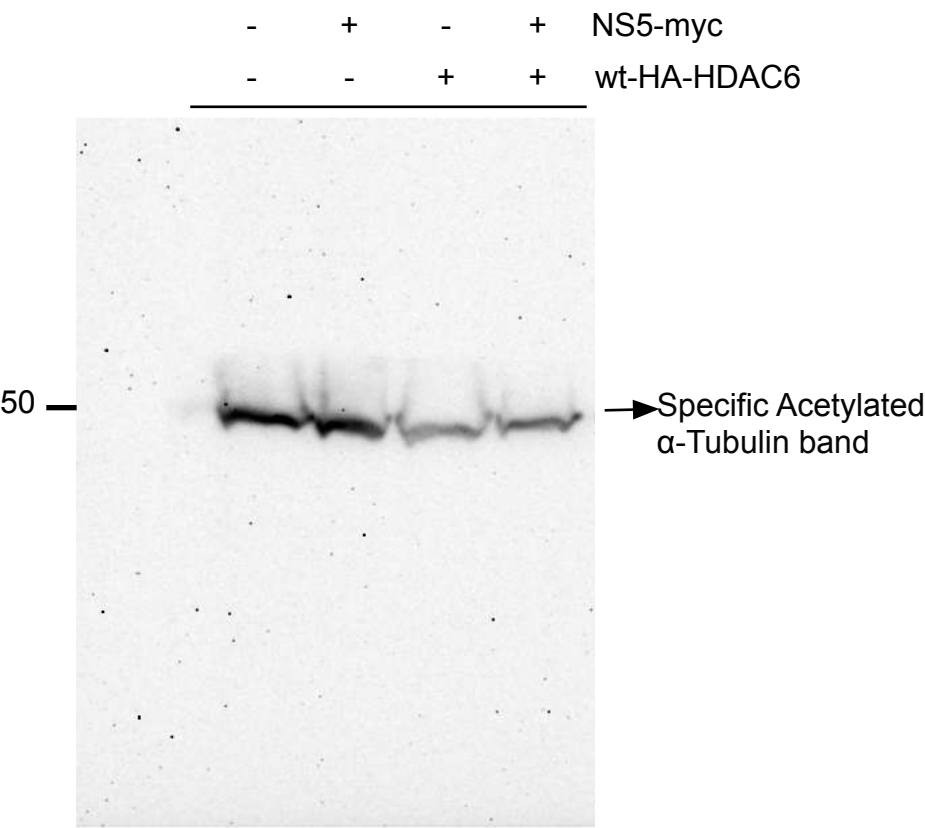

**Figura S3D.** Western-blot replicates associated with Figure 3D.

**Replicate 1 as figure format**

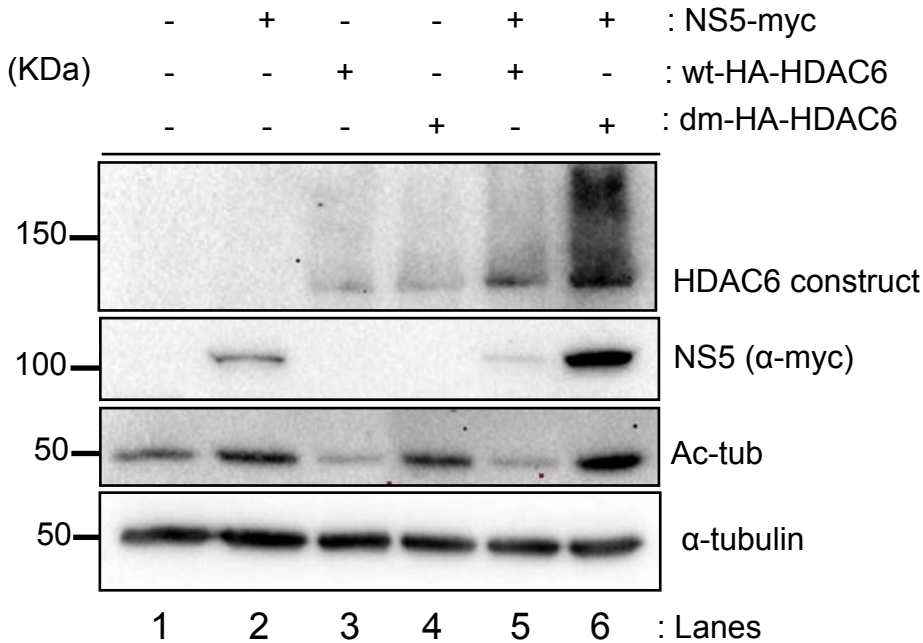

**Replicate 2 as figure format**

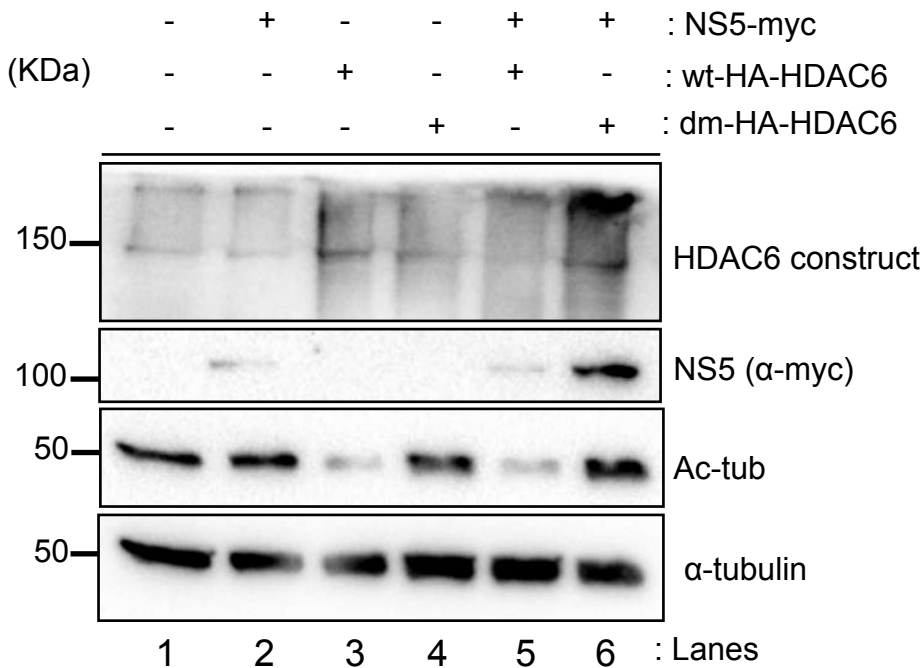

**Figure S3D.** Replicate 1 HDAC6 complete gel

Western-blot associated with Figure 3D  
Pérez-Yanes, S., et al.

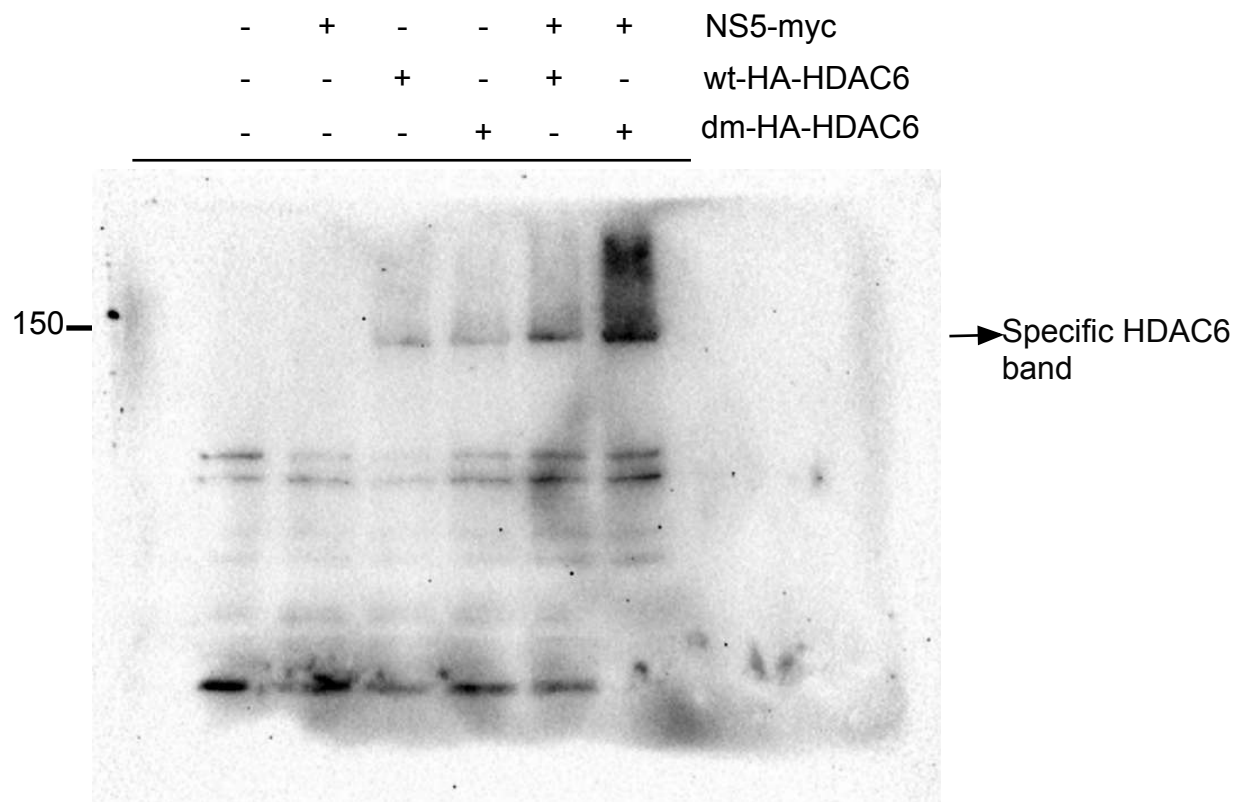

**Figure S3D.** Replicate 1 myc complete gel

Western-blot associated with Figure 3D  
Pérez-Yanes, S., et al.

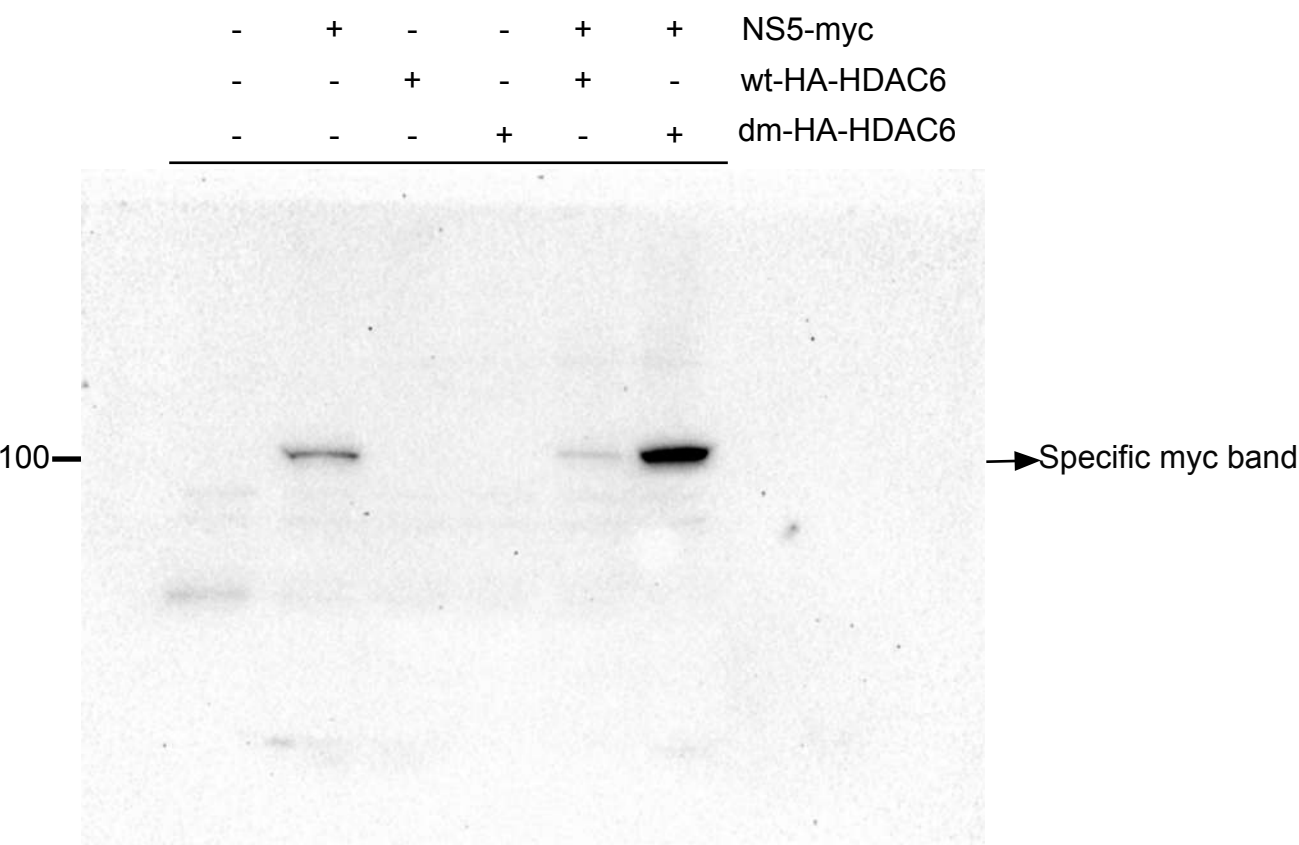

**Figure S3D.** Replicate 1 Total  $\alpha$ -Tubulin complete gel

Western-blot associated with Figure 3D  
Pérez-Yanes, S., et al.

|   |   |   |   |   |   |             |
|---|---|---|---|---|---|-------------|
| - | + | - | - | + | + | NS5-myc     |
| - | - | + | - | + | - | wt-HA-HDAC6 |
| - | - | - | + | - | + | dm-HA-HDAC6 |

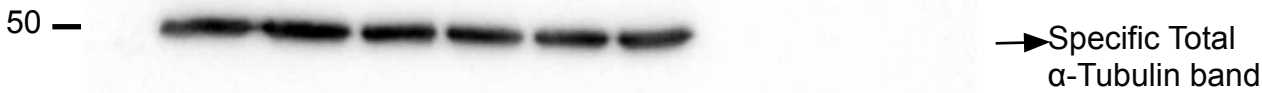

**Figure S3D.** Replicate 1 Acetylated  $\alpha$ -Tubulin Western-blot associated with Figure 3D  
Pérez-Yanes, S., et al.

|   |   |   |   |   |   |             |
|---|---|---|---|---|---|-------------|
| - | + | - | - | + | + | NS5-myc     |
| - | - | + | - | + | - | wt-HA-HDAC6 |
| - | - | - | + | - | + | dm-HA-HDAC6 |

50 —

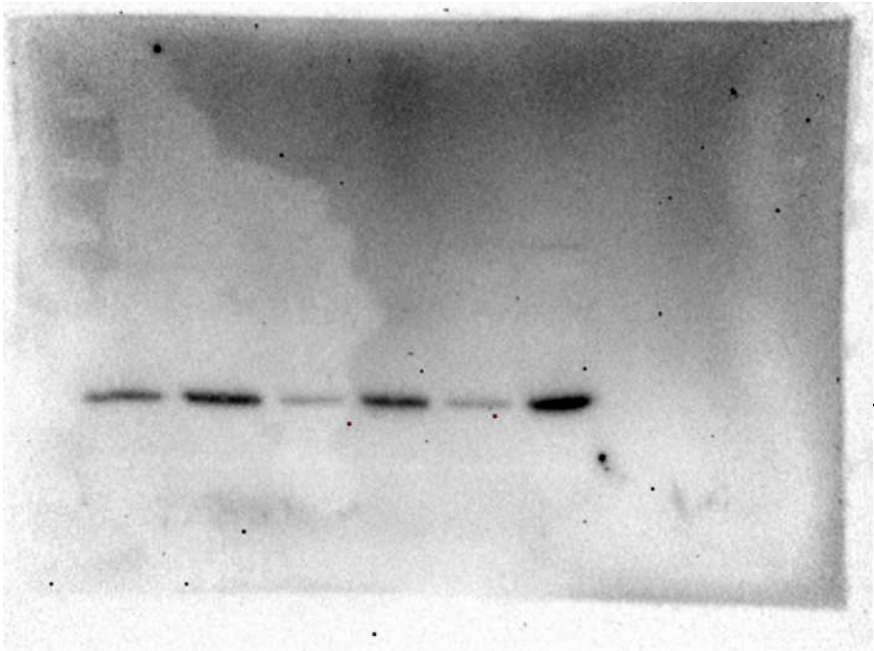

→ Specific Acetylated  $\alpha$ -Tubulin band

**Figure S3D.** Replicate 2 HDAC6 complete gel

Western-blot associated with Figure 3D  
Pérez-Yanes, S., et al.

|   |   |   |   |   |   |             |
|---|---|---|---|---|---|-------------|
| - | + | - | - | + | + | NS5-myc     |
| - | - | + | - | + | - | wt-HA-HDAC6 |
| - | - | - | + | - | + | dm-HA-HDAC6 |

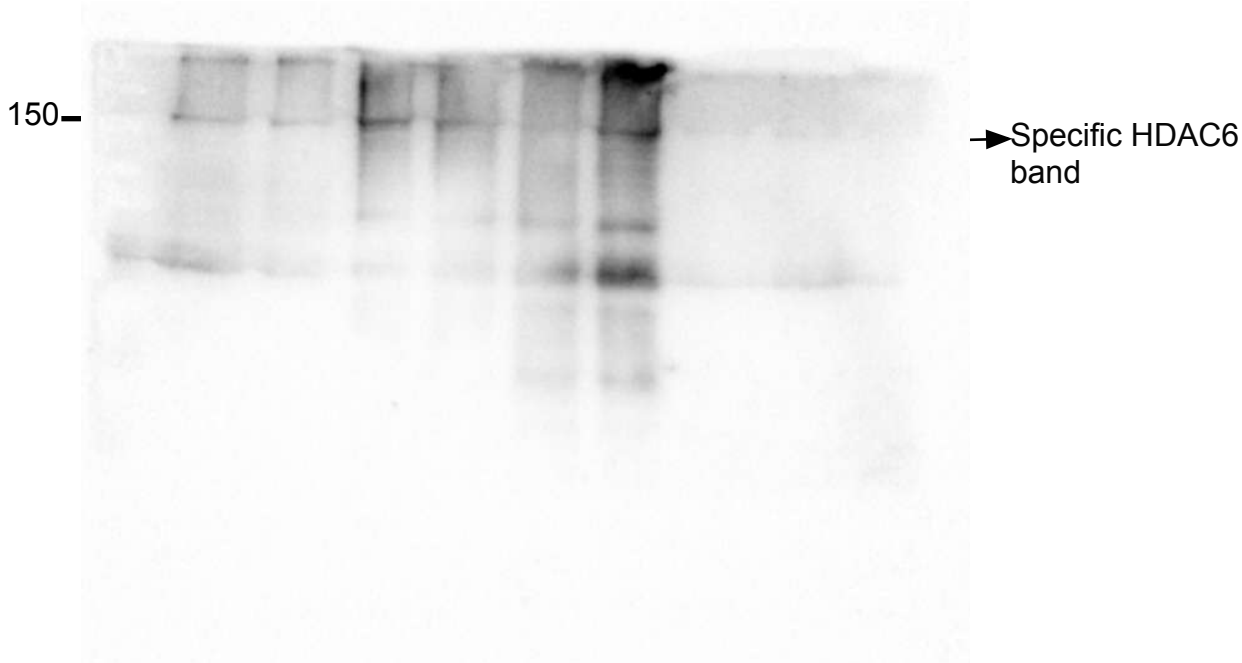

**Figure S3D.** Replicate 2 myc complete gel

Western-blot associated with Figure 3D  
Pérez-Yanes, S., et al.

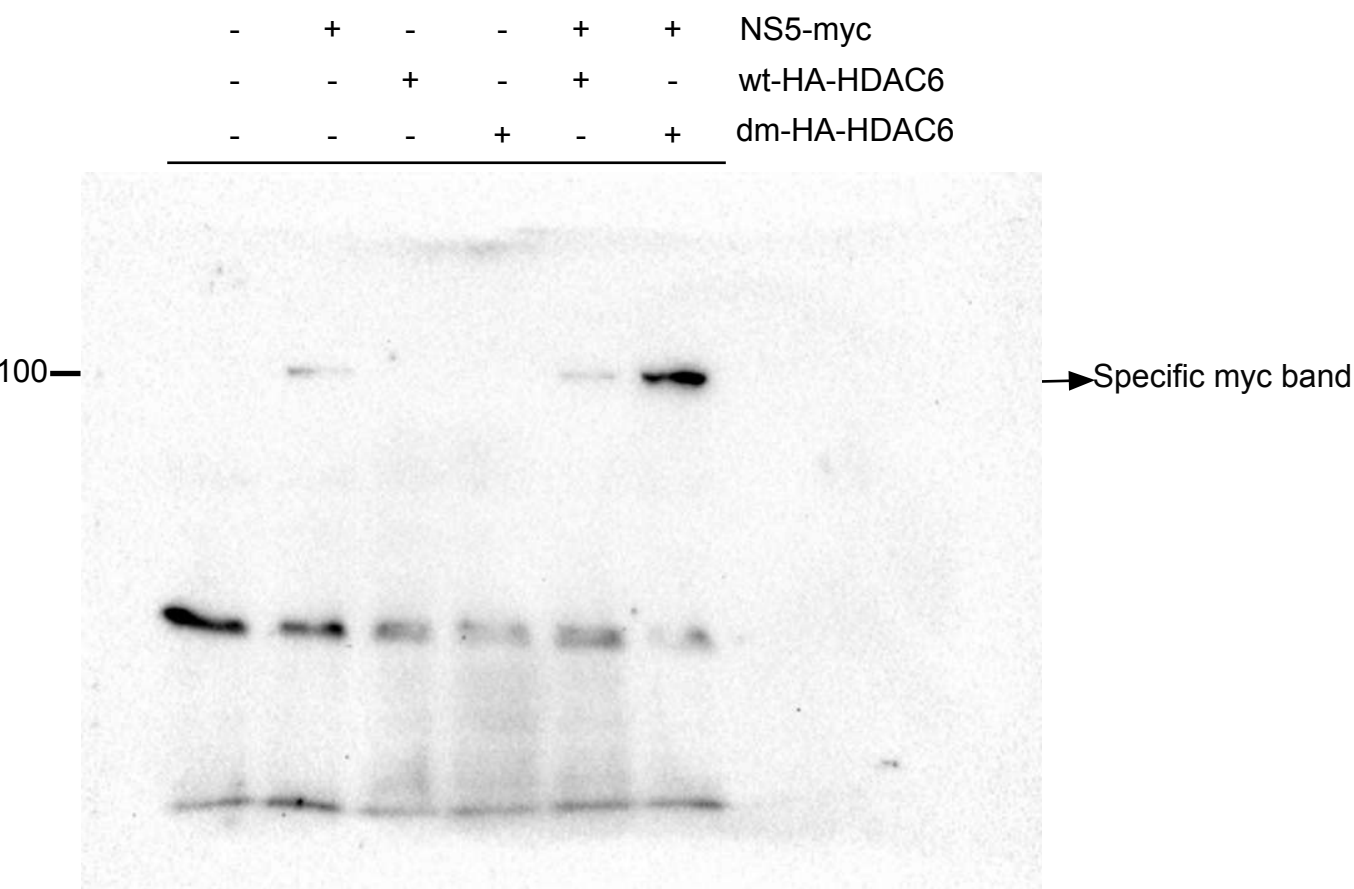



**Figure S3D.** Replicate 2 Total  $\alpha$ -Tubulin complete gel

Western-blot associated with Figure 3D  
Pérez-Yanes, S., et al.

|   |   |   |   |   |   |             |
|---|---|---|---|---|---|-------------|
| - | + | - | - | + | + | NS5-myc     |
| - | - | + | - | + | - | wt-HA-HDAC6 |
| - | - | - | + | - | + | dm-HA-HDAC6 |

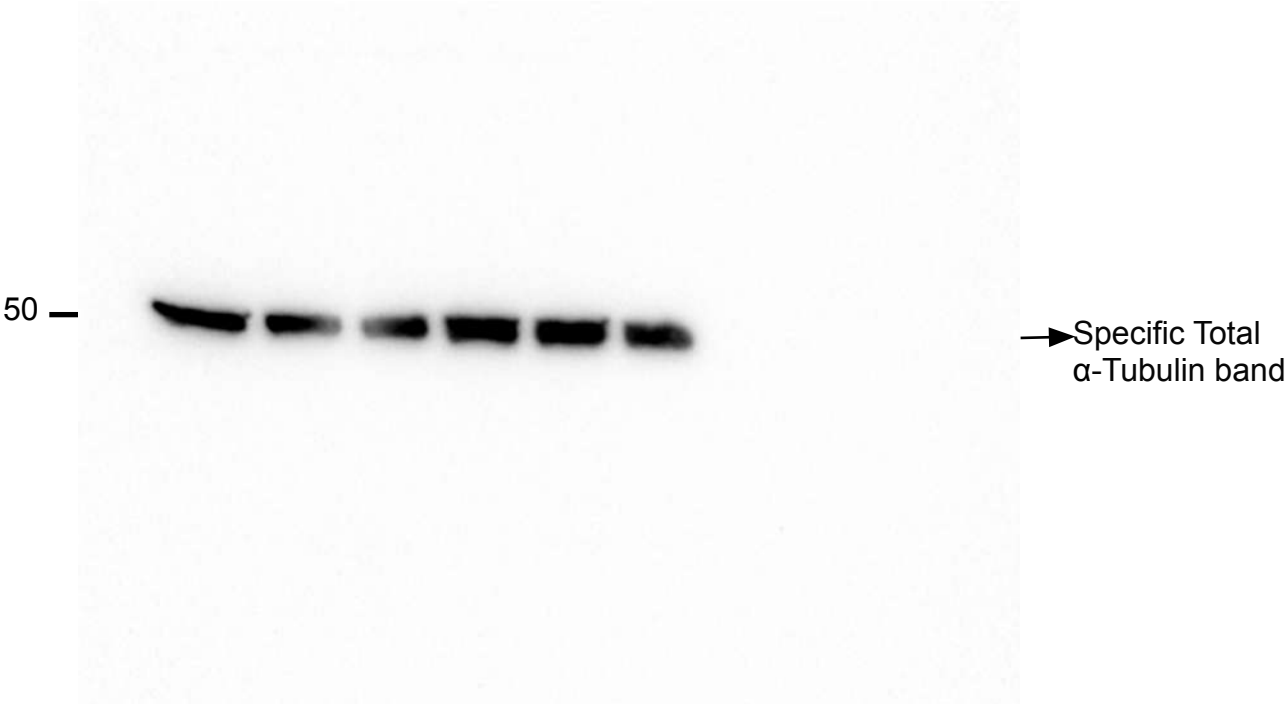

**Figure S3D.** *Replicate 2 Acetylated  $\alpha$ -Tubulin Western-blot associated with Figure 3D*  
*Pérez-Yanes, S., et al.*

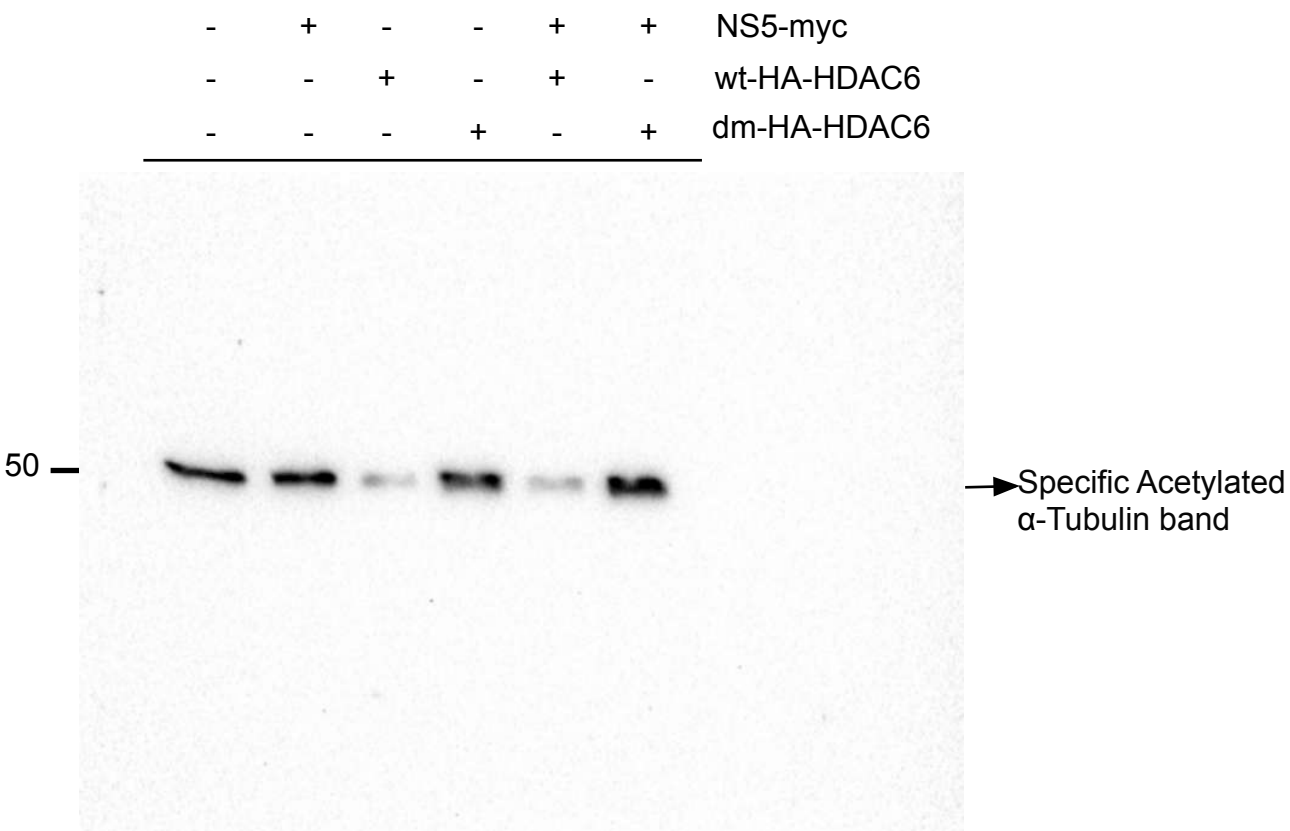

**Figura S4A.** Western-blot replicates associated with Figure 4A.

**Replicate 1 as figure format**

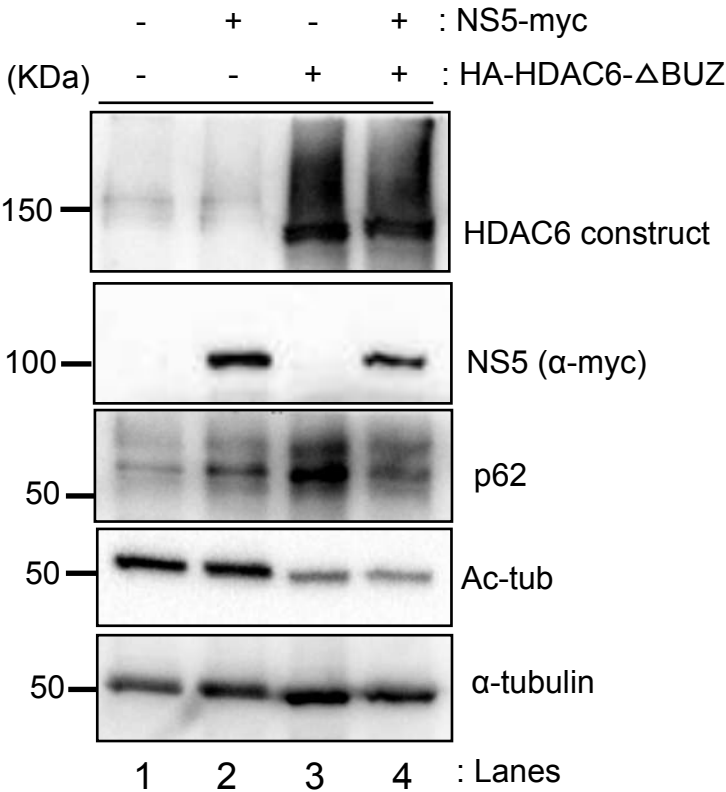

**Replicate 2 as figure format**

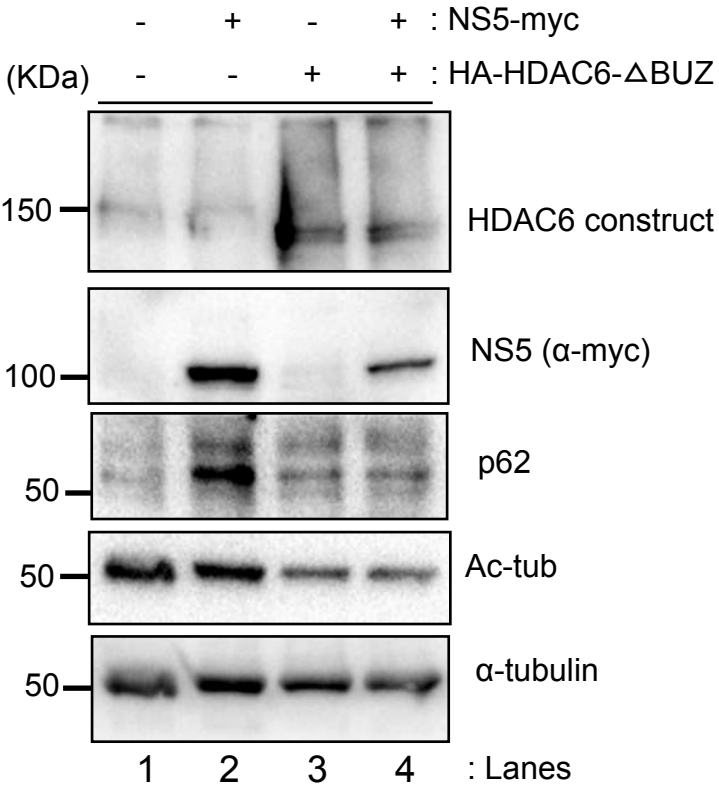

**Replicate 3 as figure format**

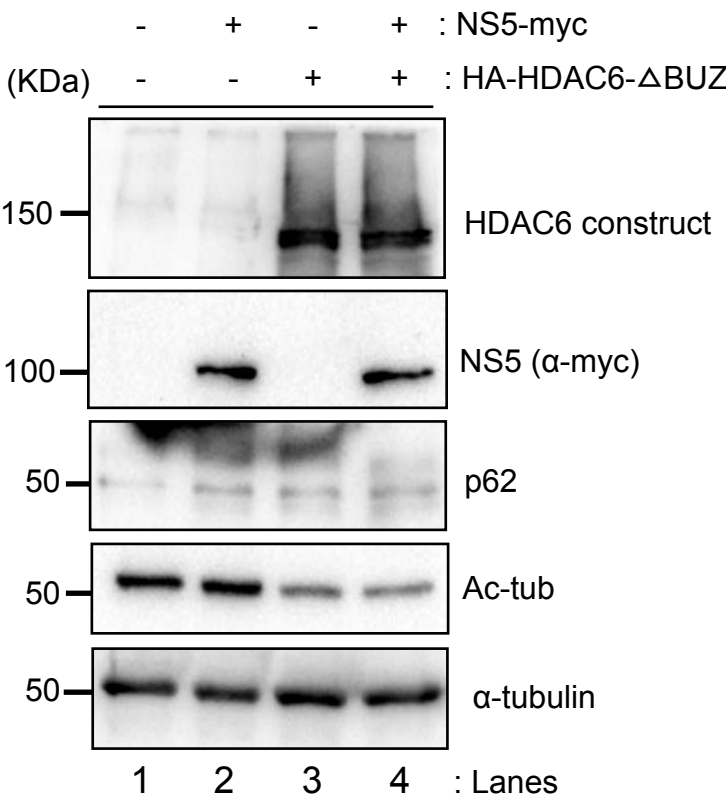

**Figure S4A.** Replicate 1 HDAC6 complete gel

Western-blot associated with Figure 4A  
Pérez-Yanes, S., et al.

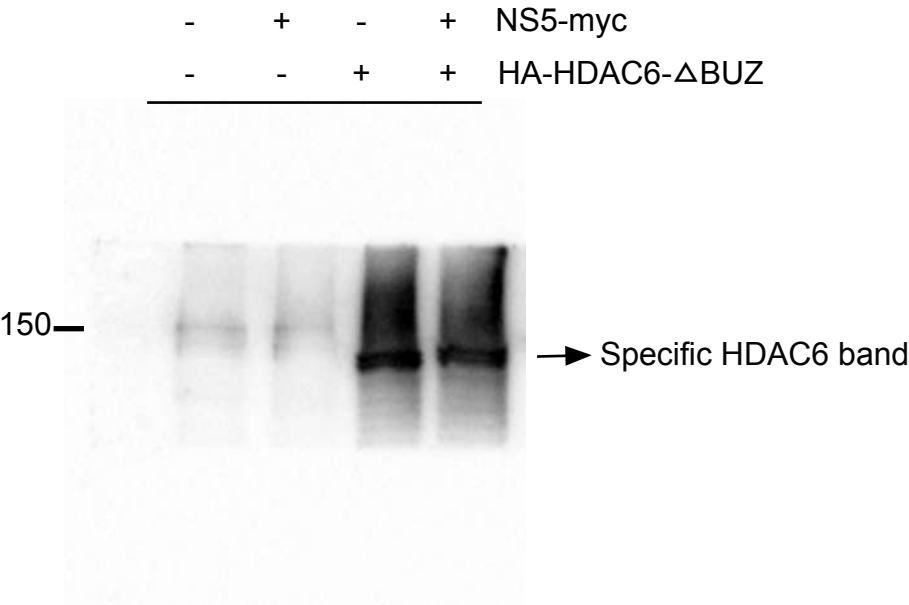

**Figure S4A.** Replicate 1 myc complete gel

Western-blot associated with Figure 4A  
Pérez-Yanes, S., et al.

|   |   |   |   |               |
|---|---|---|---|---------------|
| - | + | - | + | NS5-myc       |
| - | - | + | + | HA-HDAC6-ΔBuz |

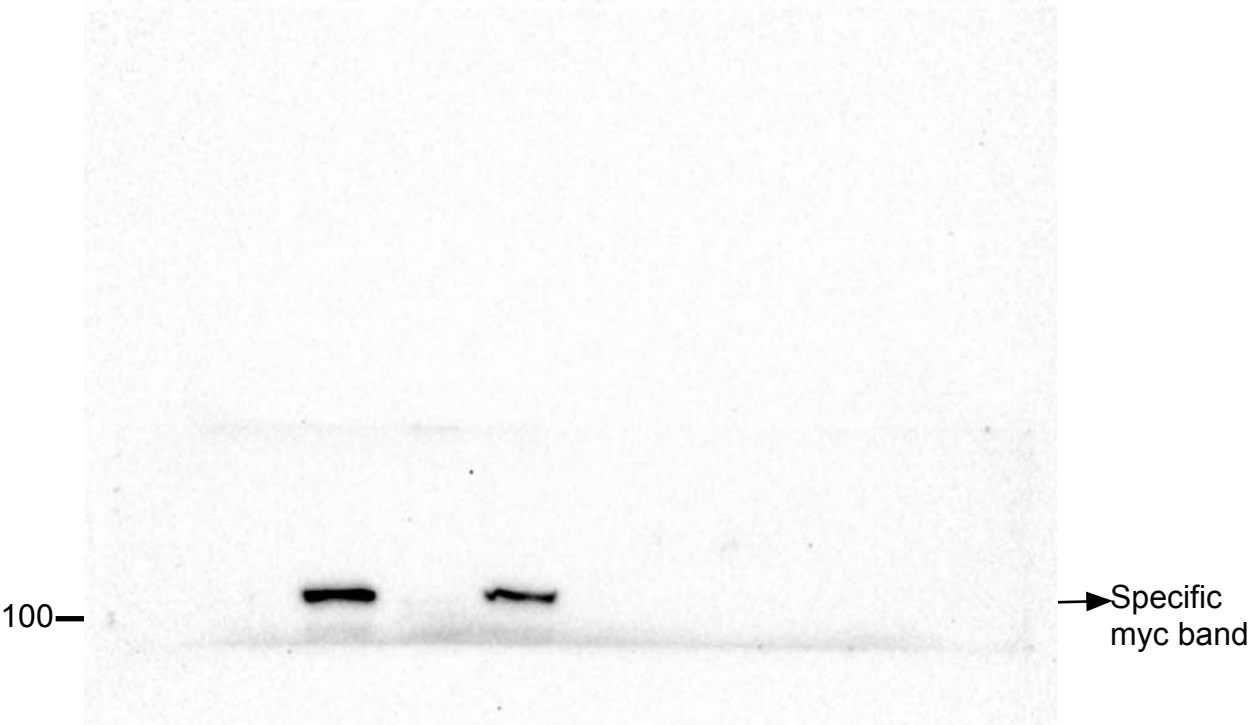

**Figure S4A.** Replicate 1 p62 complete gel

Western-blot associated with Figure 4A  
Pérez-Yanes, S., et al.

|   |   |   |   |                        |
|---|---|---|---|------------------------|
| - | + | - | + | NS5-myc                |
| - | - | + | + | HA-HDAC6- $\Delta$ BUZ |

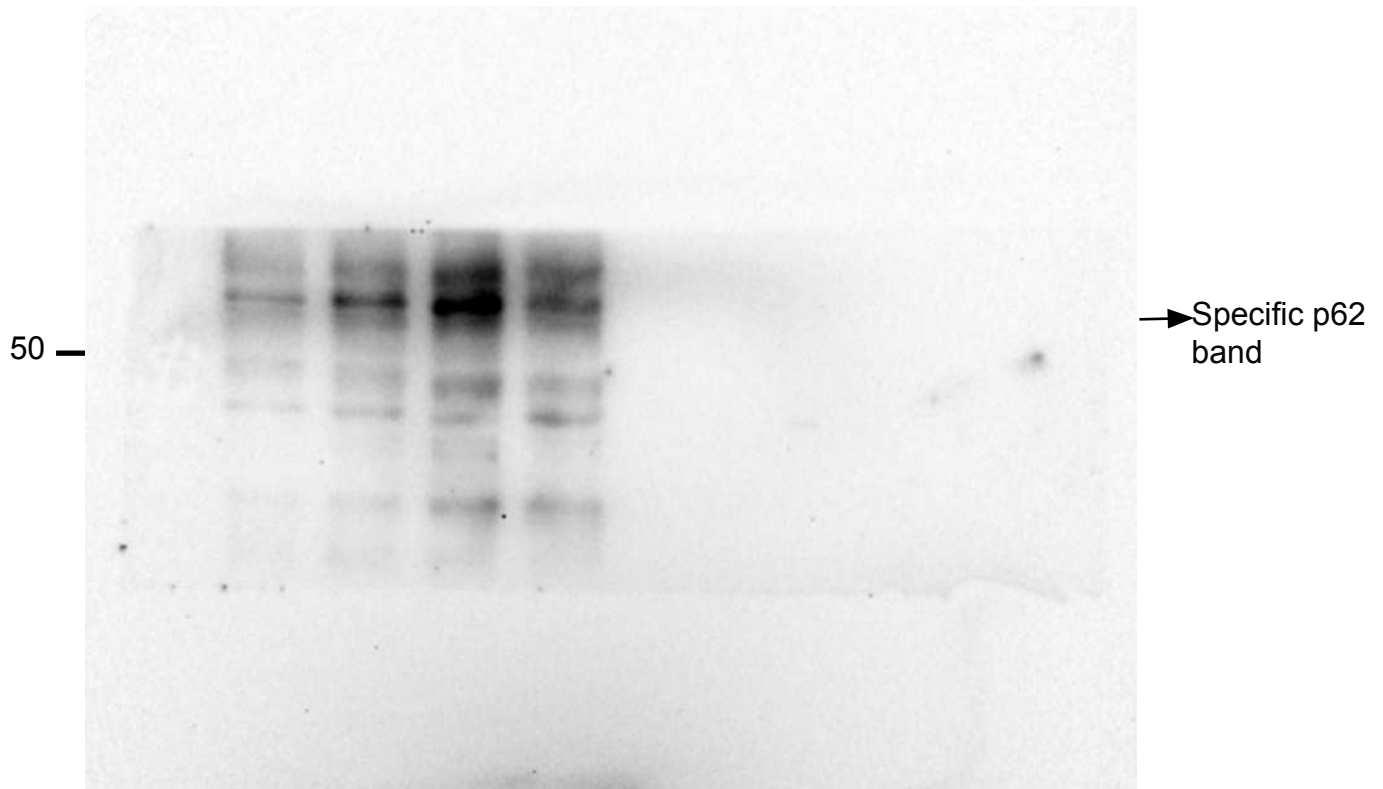

**Figure S4A.** Replicate 1 Total  $\alpha$ -Tubulin complete gel

Western-blot associated with Figure 4A  
Pérez-Yanes, S., et al.

|   |   |   |   |                        |
|---|---|---|---|------------------------|
| - | + | - | + | NS5-myc                |
| - | - | + | + | HA-HDAC6- $\Delta$ BUZ |

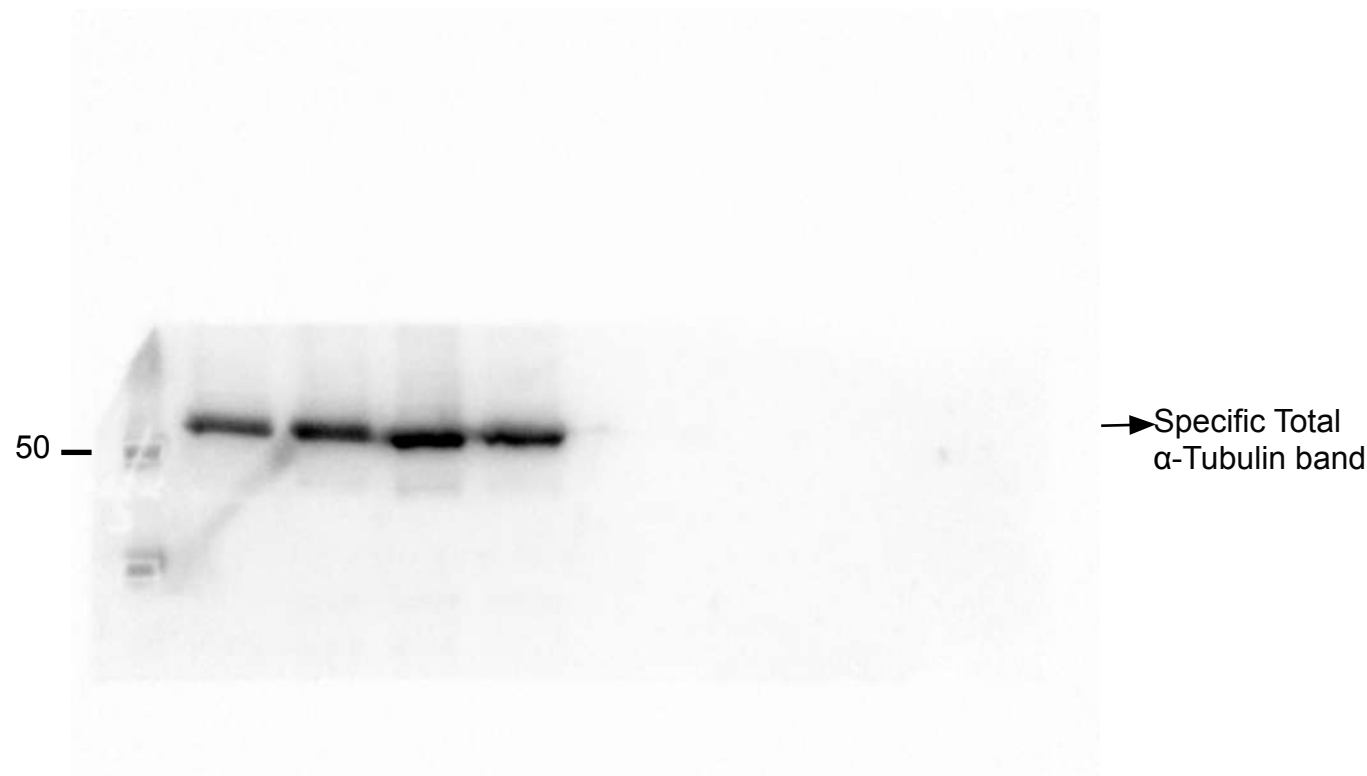

**Figure S4A.** *Replicate 1 Acetylated  $\alpha$ -Tubulin Western-blot associated with Figure 4A*  
*Pérez-Yanes, S., et al.*

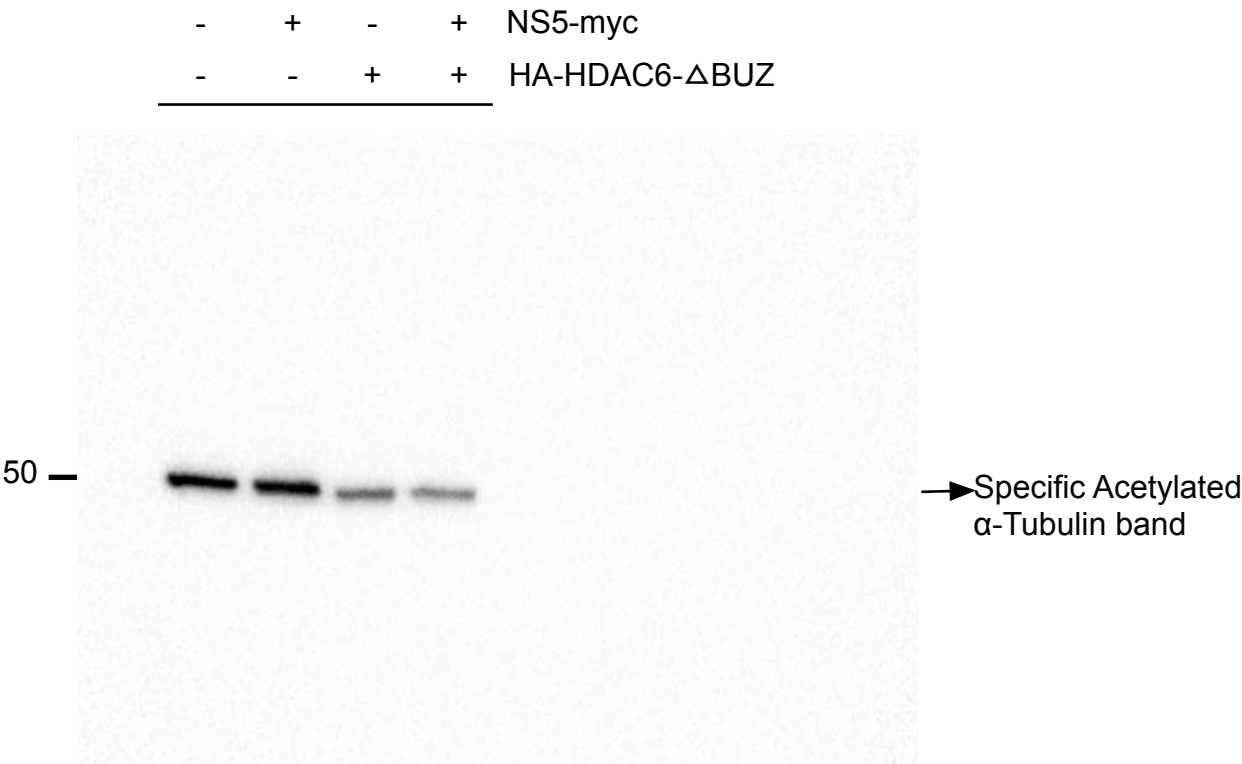



**Figure S4A.** Replicate 2 HDAC6 complete gel

Western-blot associated with Figure 4A  
Pérez-Yanes, S., et al.

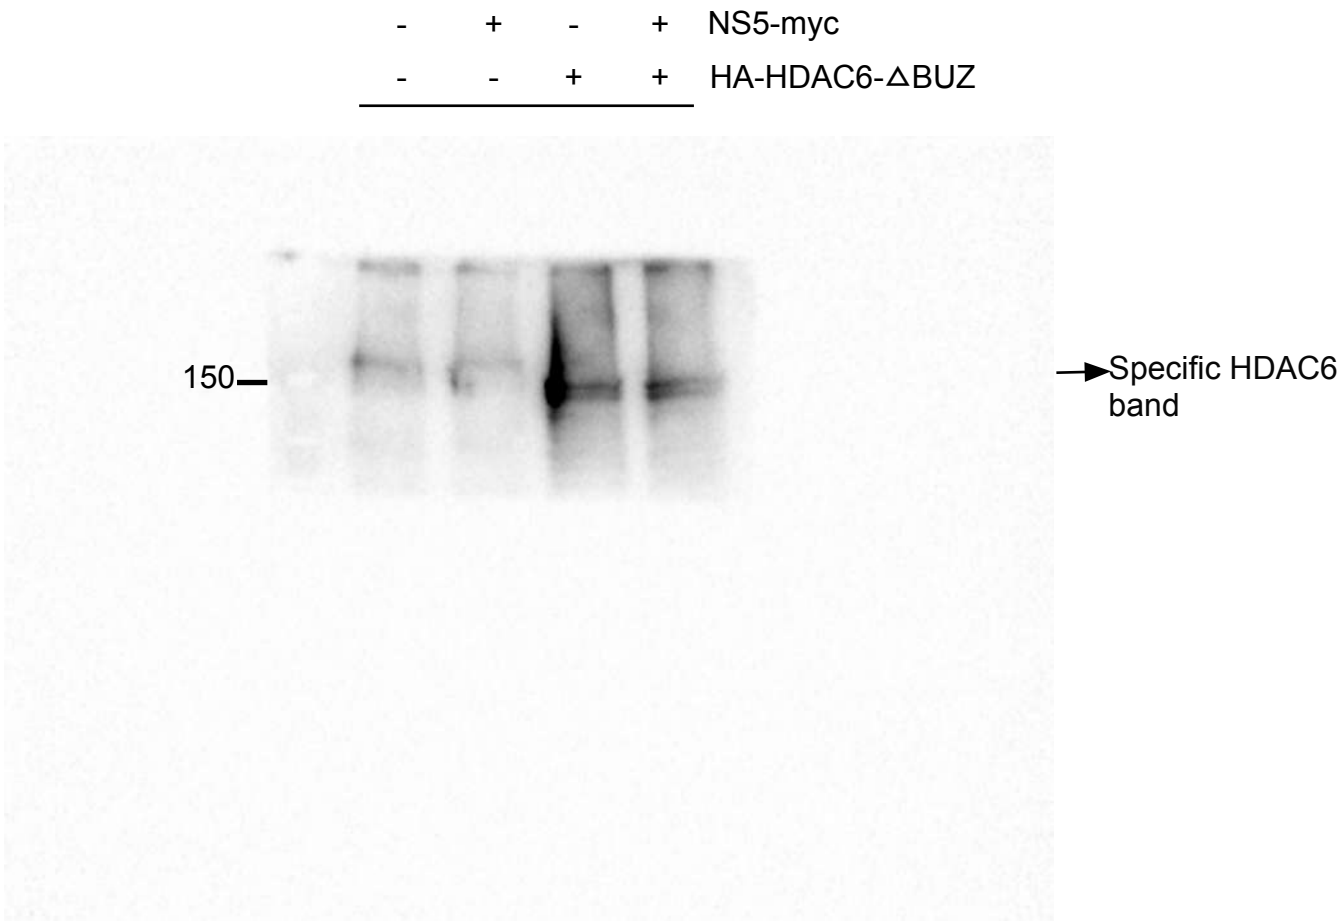

**Figure S4A.** Replicate 2 myc complete gel

Western-blot associated with Figure 4A  
Pérez-Yanes, S., et al.

|   |   |   |   |               |
|---|---|---|---|---------------|
| - | + | - | + | NS5-myc       |
| - | - | + | + | HA-HDAC6-ΔBUZ |

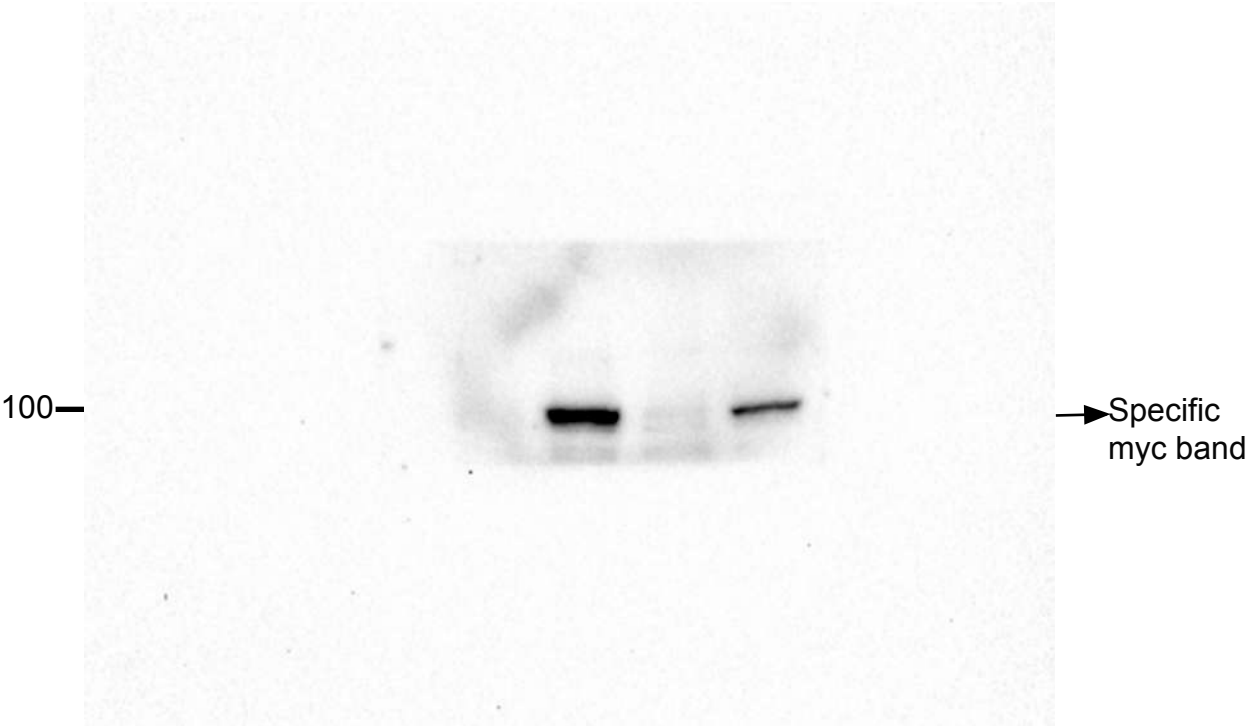

**Figure S4A.** Replicate 2 p62 complete gel

Western-blot associated with Figure 4A  
Pérez-Yanes, S., et al.

|   |   |   |   |               |
|---|---|---|---|---------------|
| - | + | - | + | NS5-myc       |
| - | - | + | + | HA-HDAC6-ΔBUZ |

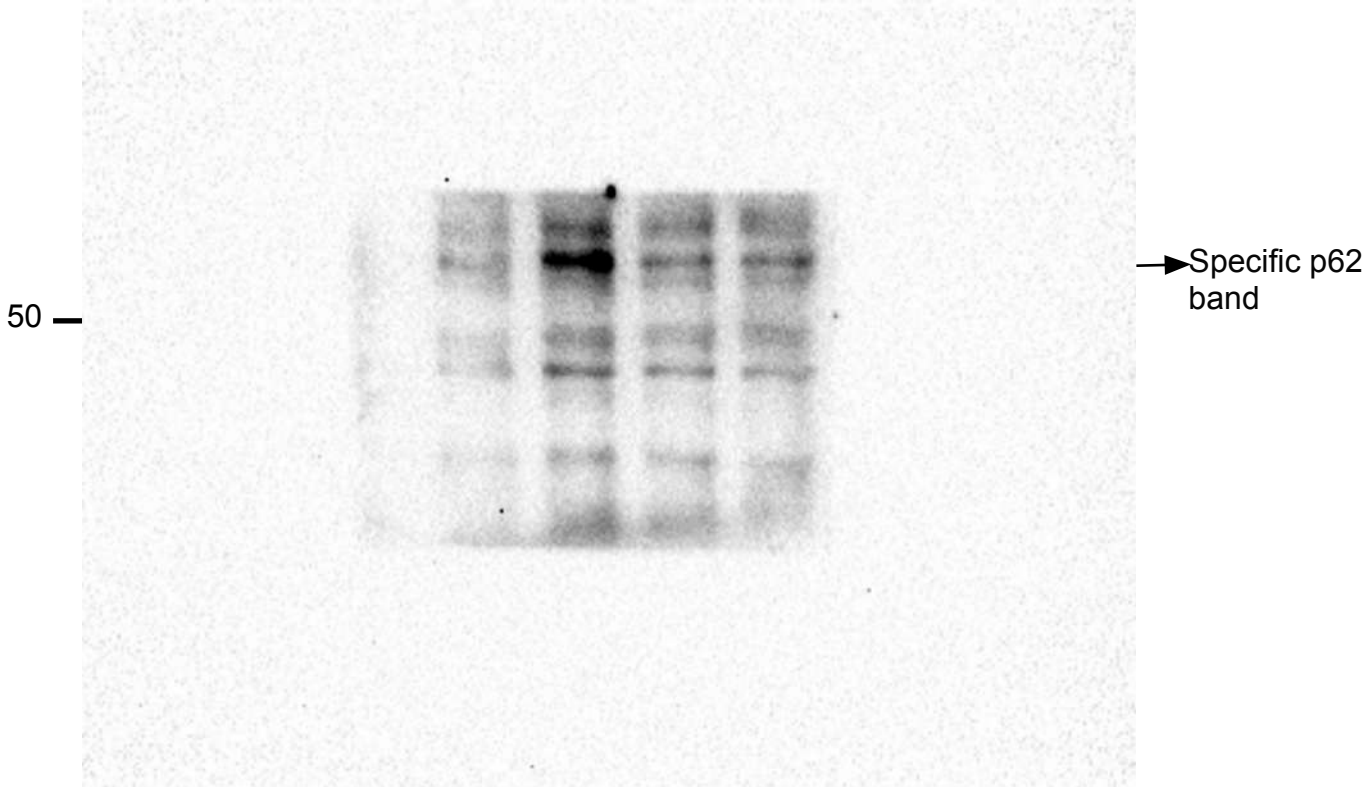

**Figure S4A.** Replicate 2 Total  $\alpha$ -Tubulin complete gel

Western-blot associated with Figure 4A  
Pérez-Yanes, S., et al.

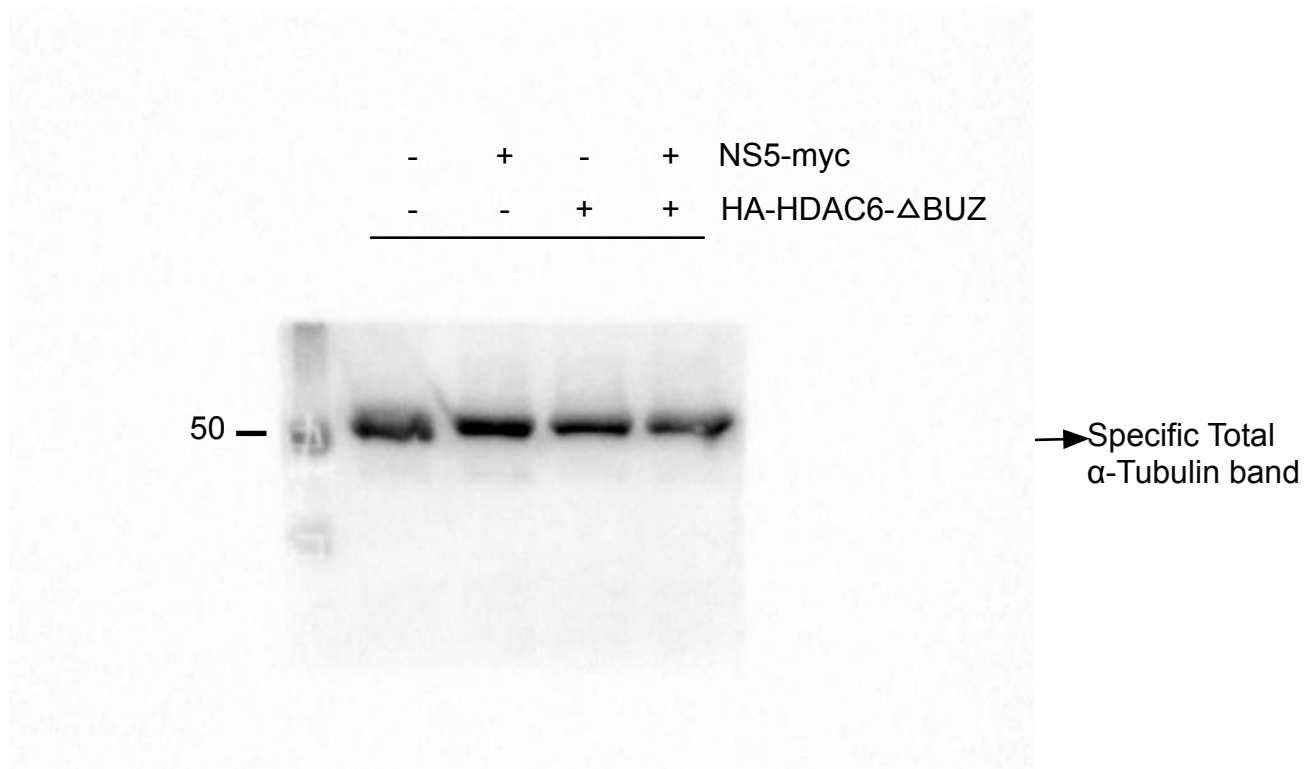

**Figure S4A.** *Replicate 2 Acetylated  $\alpha$ -Tubulin Western-blot associated with Figure 4A*  
*Pérez-Yanes, S., et al.*

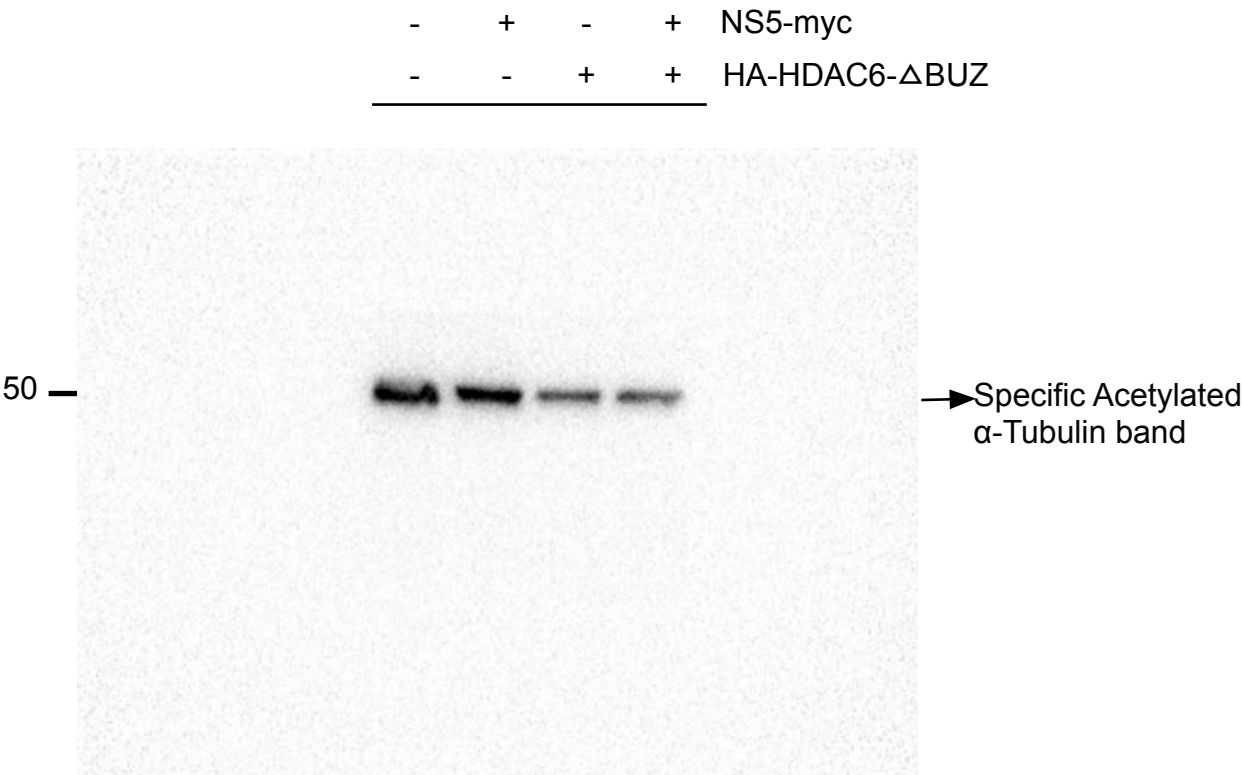

**Figure S4A.** Replicate 3 HDAC6 complete gel

Western-blot associated with Figure 4A  
Pérez-Yanes, S., et al.

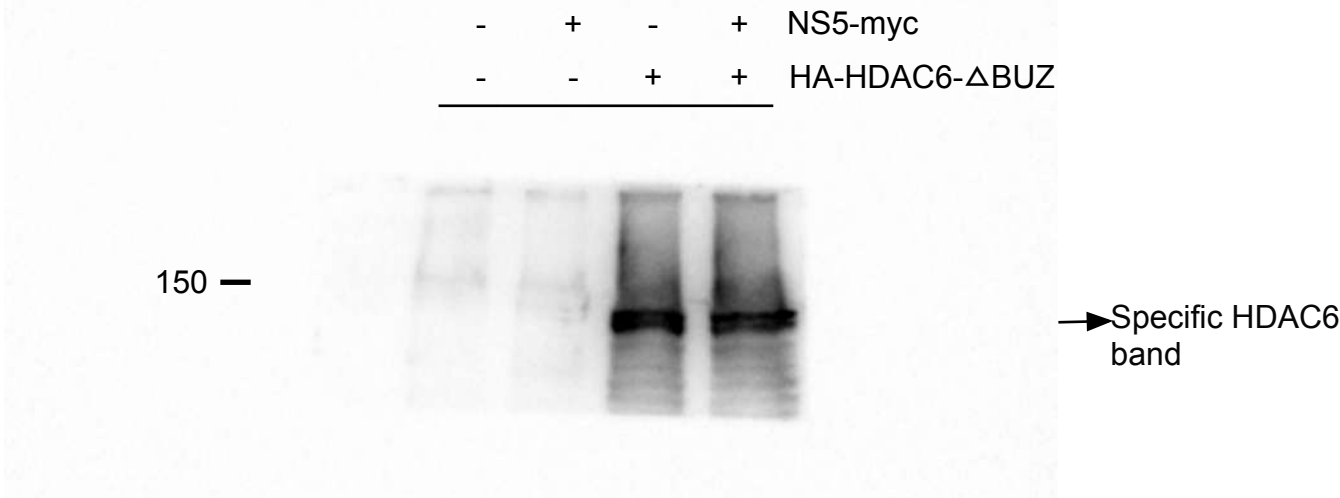

**Figure S4A.** Replicate 3 myc complete gel

Western-blot associated with  
Figure 4A  
Pérez-Yanes, S., et al.

|   |   |   |   |                        |
|---|---|---|---|------------------------|
| - | + | - | + | NS5-myc                |
| - | - | + | + | HA-HDAC6- $\Delta$ BUZ |

---

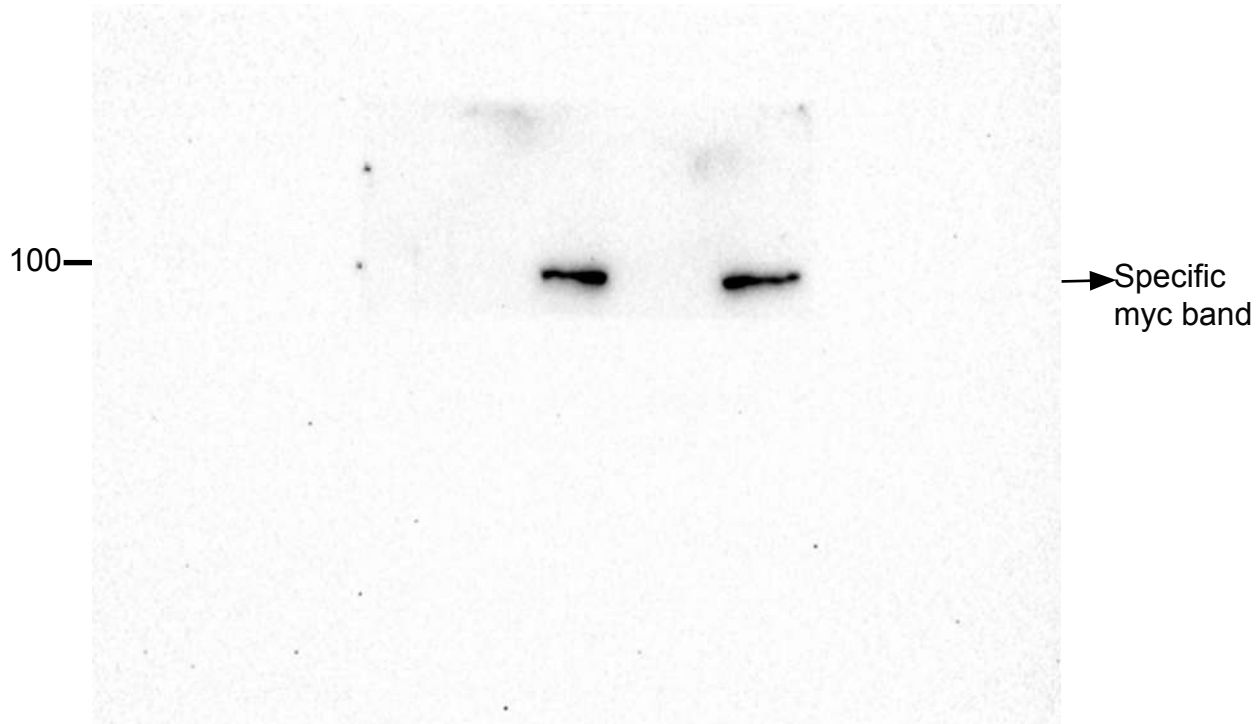

**Figure S4A.** Replicate 3 p62 complete gel

Western-blot associated with Figure 4A  
Pérez-Yanes, S., et al.

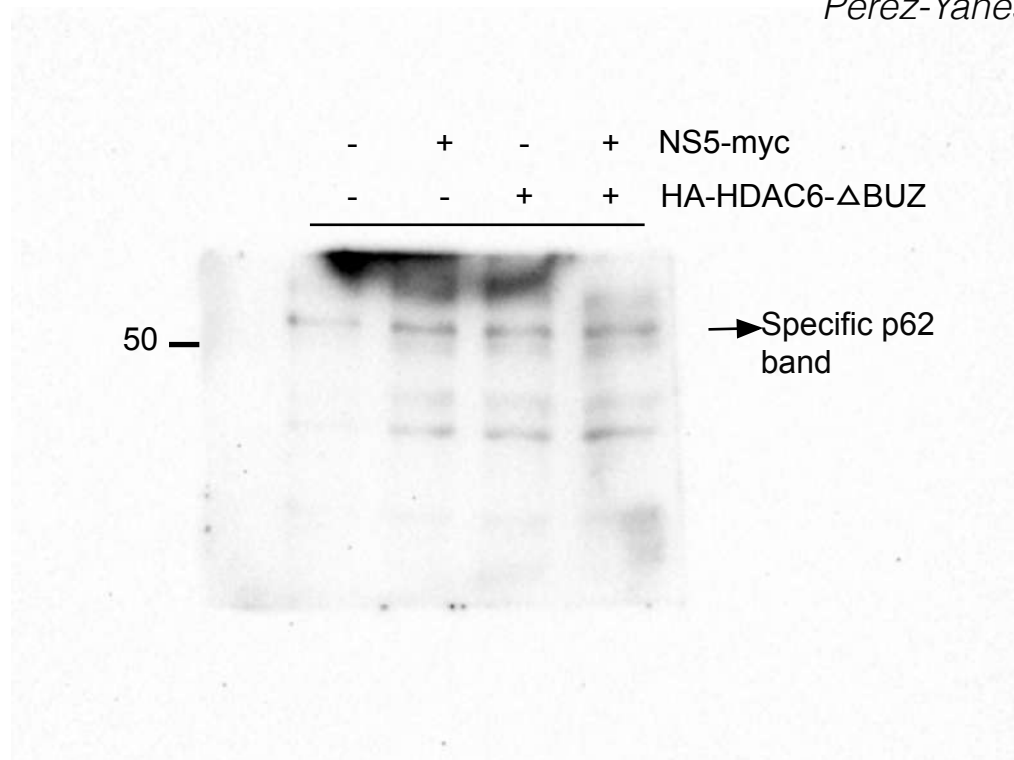



**Figure S4A.** *Replicate 3 Acetylated  $\alpha$ -Tubulin Western-blot associated with Figure 4A*  
*Pérez-Yanes, S., et al.*

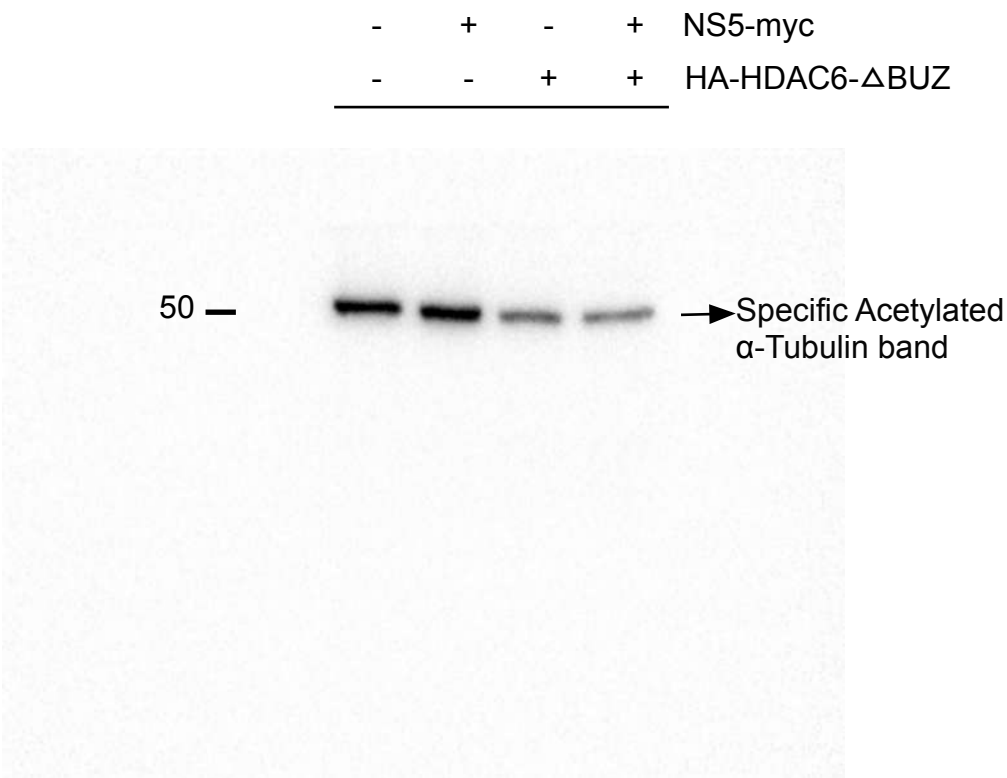

**Figure S4A.** Replicate 3 Total  $\alpha$ -Tubulin complete gel

Western-blot associated with Figure 4A  
Pérez-Yanes, S., et al.

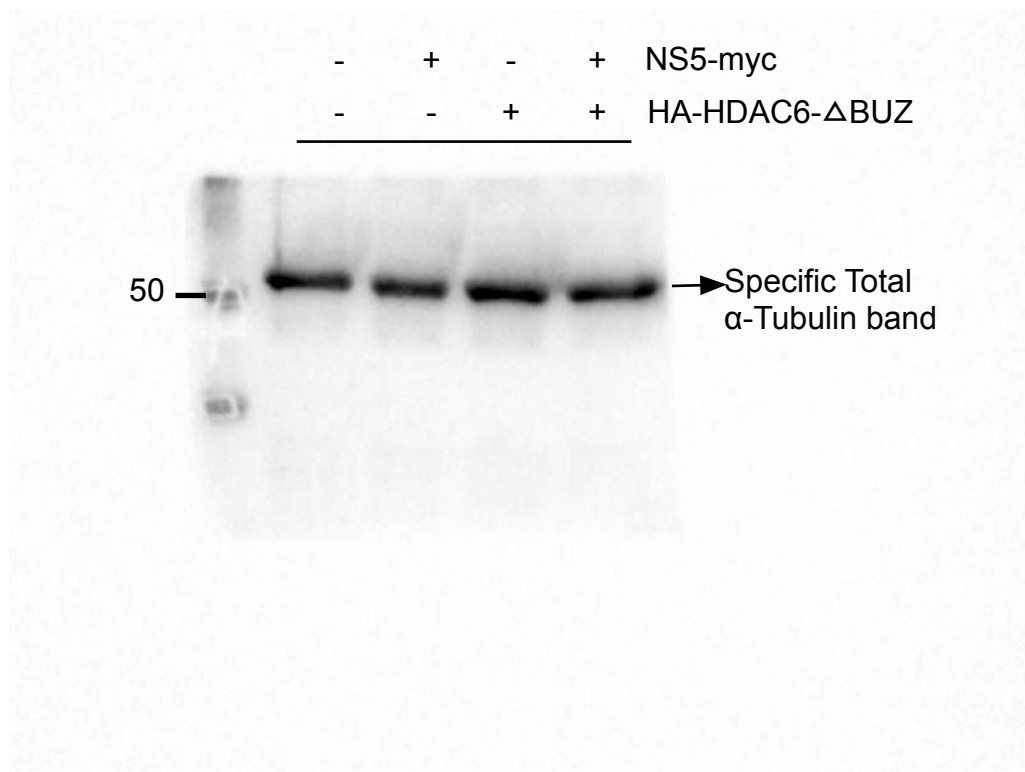

**Figure S4C.** Western-blot replicates associated with Figure 4C.

**Replicate 1 as figure format**

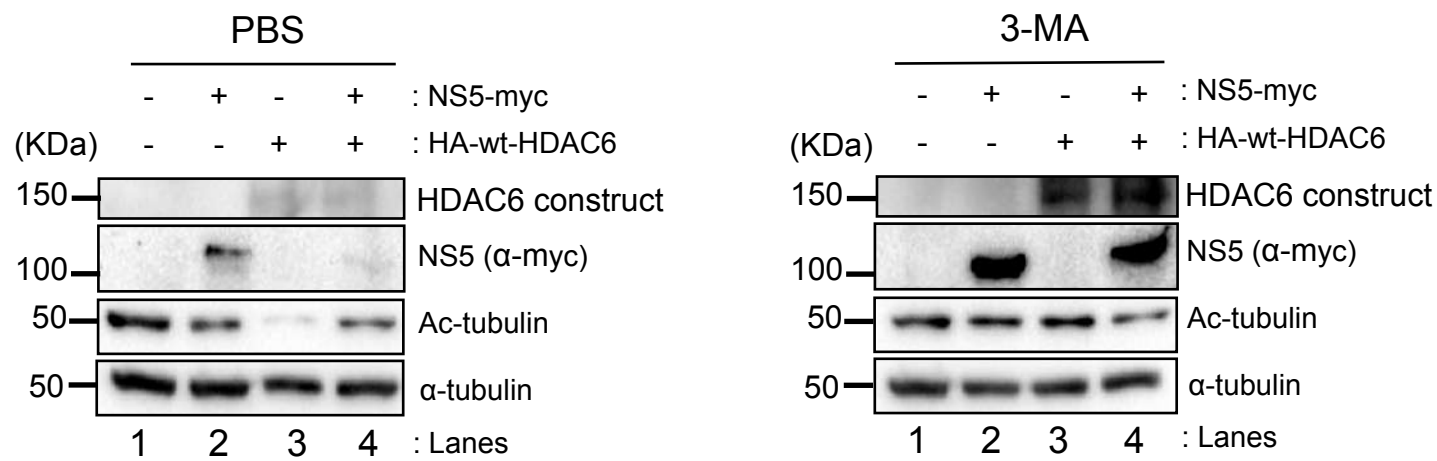

**Replicate 2 as figure format**

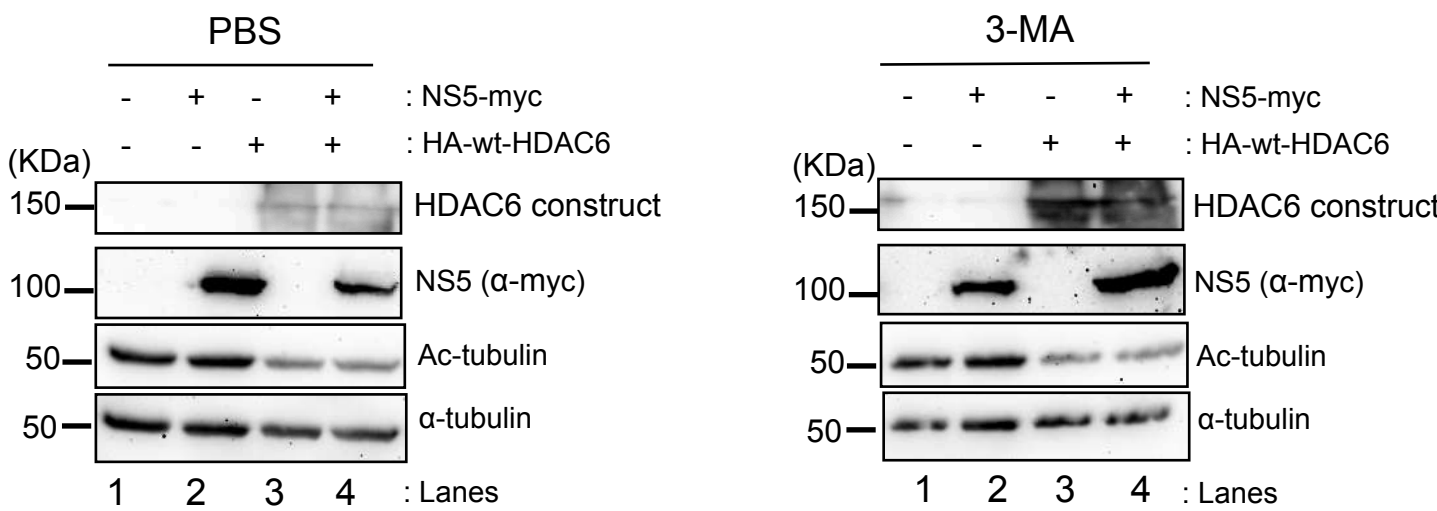

**Figure S4C.** Replicate 1 HDAC6 complete gel

Western-blot associated with Figure 4C  
Pérez-Yanes, S., et al.

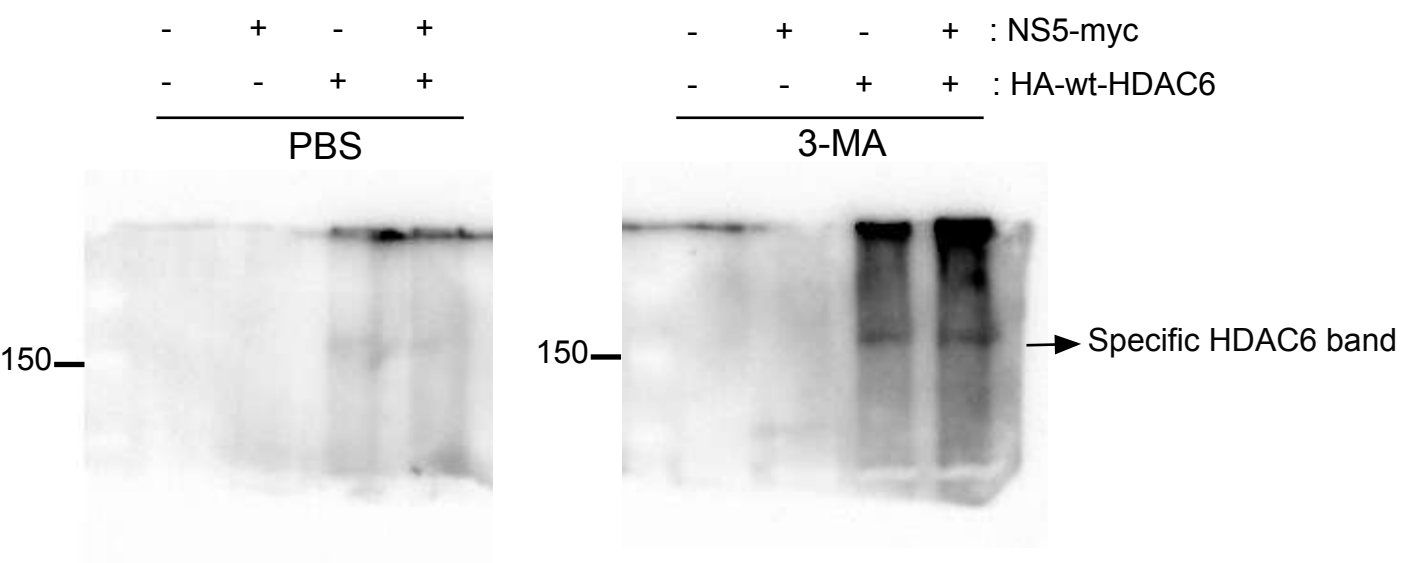

**Figure S4C.** Replicate 1 myc complete gel

Western-blot associated with Figure 4C  
Pérez-Yanes, S., et al.

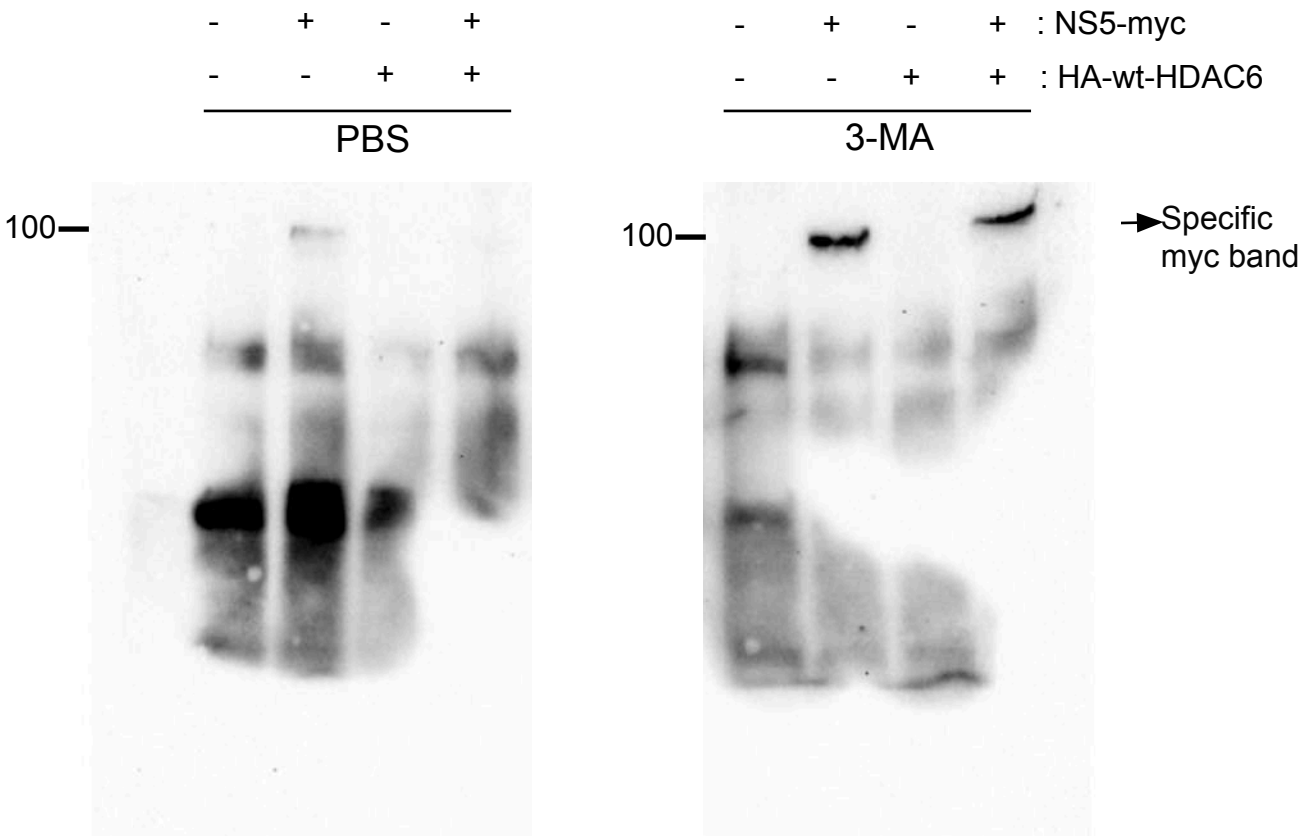

**Figure S4C.** Replicate 1 Acetylated  $\alpha$ -Tubulin complete gel

Western-blot associated with Figure 4C  
Pérez-Yanes, S., et al.

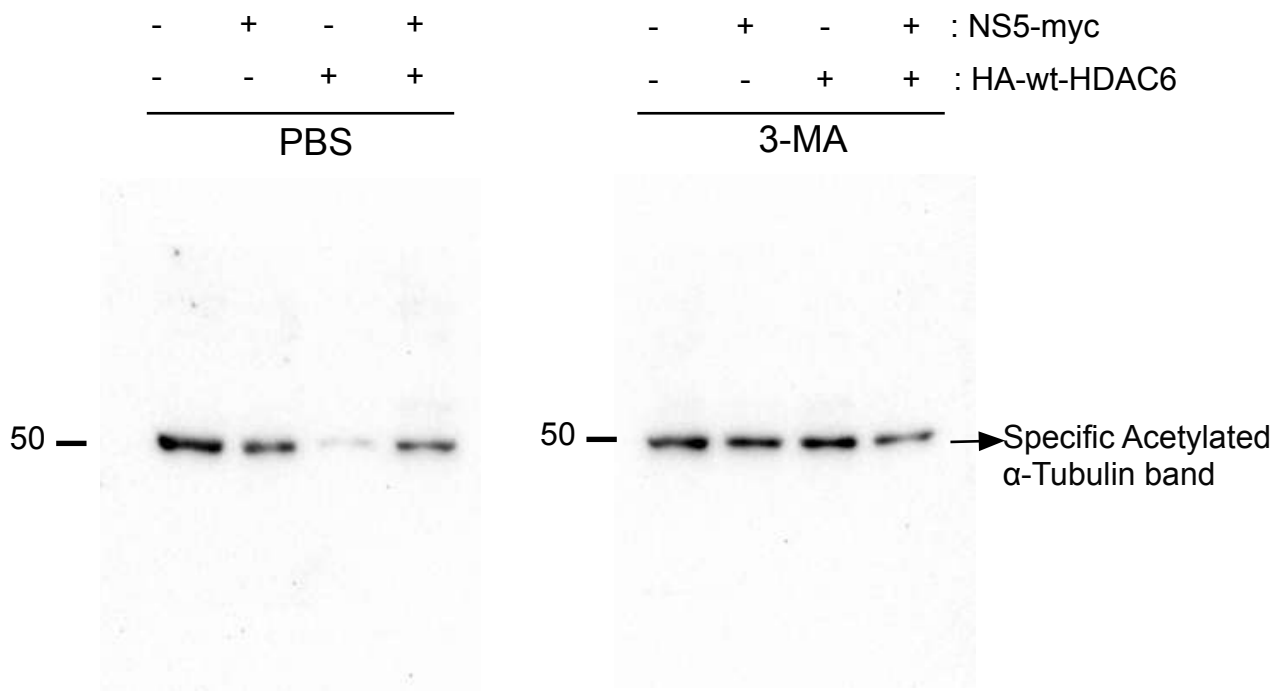

**Figure S4C.** Replicate 2 HDAC6 complete gel

Western-blot associated with Figure 4C  
Pérez-Yanes, S., et al.

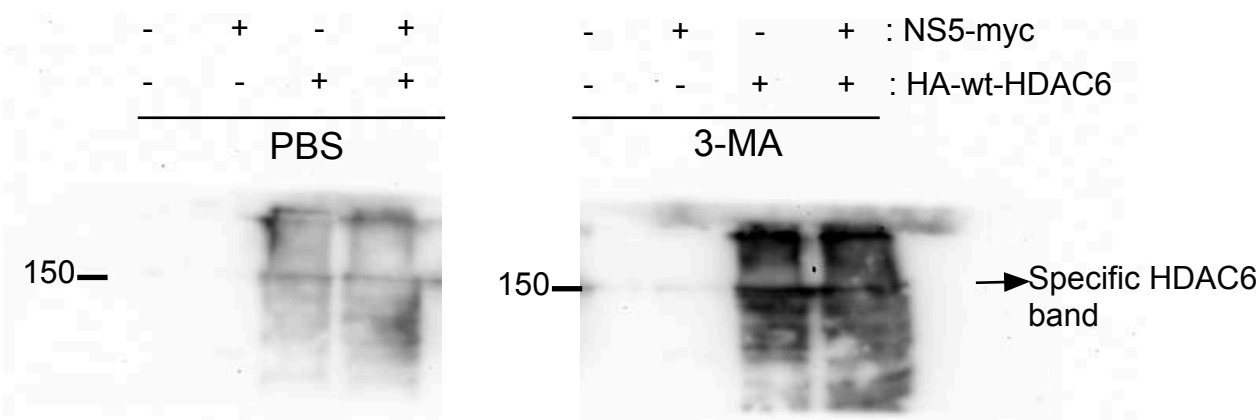

**Figure S4C.** Replicate 2 myc complete gel

Western-blot associated with Figure 4C  
Pérez-Yanes, S., et al.

|     |   |   |   |
|-----|---|---|---|
| -   | + | - | + |
| -   | - | + | + |
| PBS |   |   |   |

|      |   |   |   |               |
|------|---|---|---|---------------|
| -    | + | - | + | : NS5-myc     |
| -    | - | + | + | : HA-wt-HDAC6 |
| 3-MA |   |   |   |               |

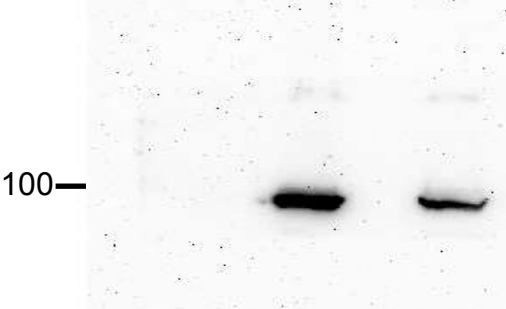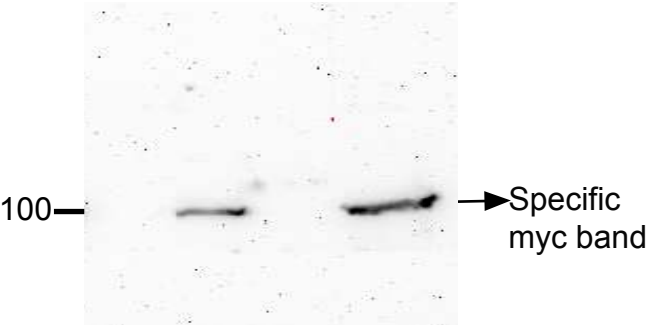



**Figure S4C.** Replicate 2 Total  $\alpha$ -Tubulin complete gel

Western-blot associated with Figure 4C  
Pérez-Yanes, S., et al.

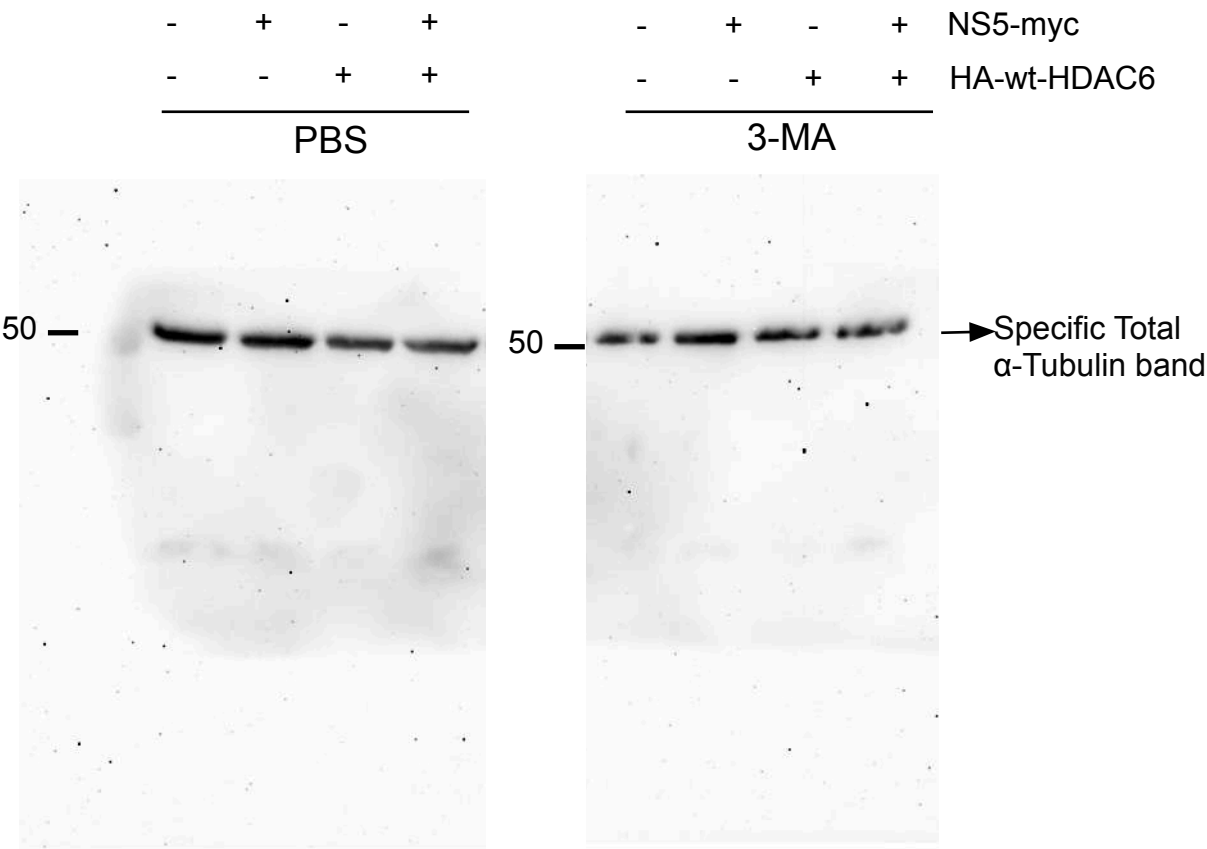

**Figure S4C.** Replicate 2 Acetylated  $\alpha$ -Tubulin complete gel

Western-blot associated with Figure 4C  
Pérez-Yanes, S., et al.

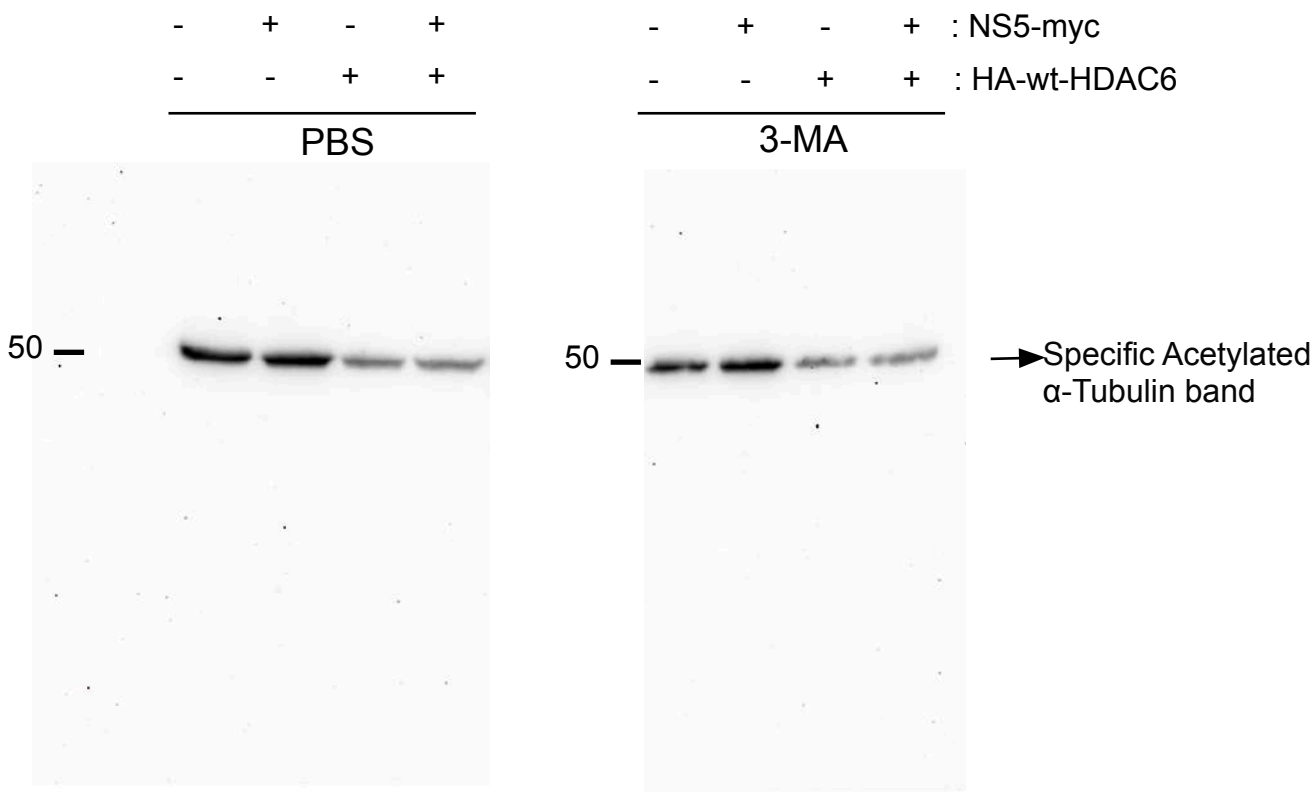

**Figura S4D.** Western-blot replicates associated with Figure 4D.

**Replicate 1 as figure format**

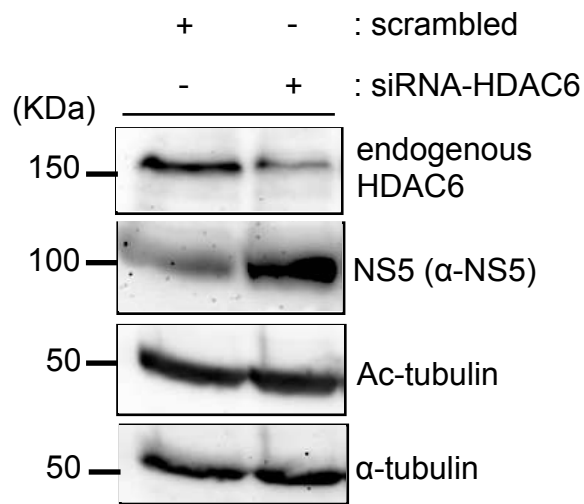

**Replicate 2 as figure format**

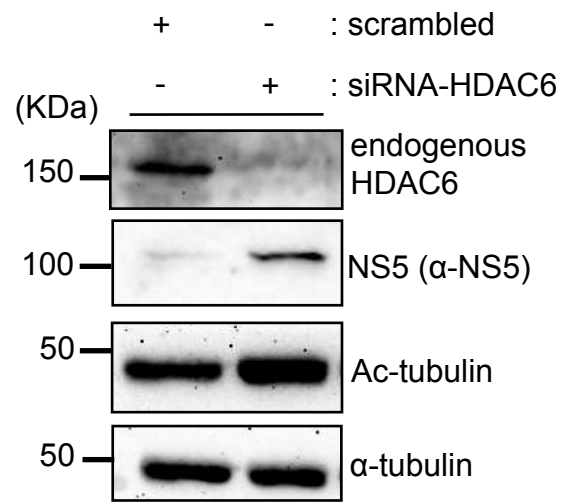

**Replicate 3 as figure format**

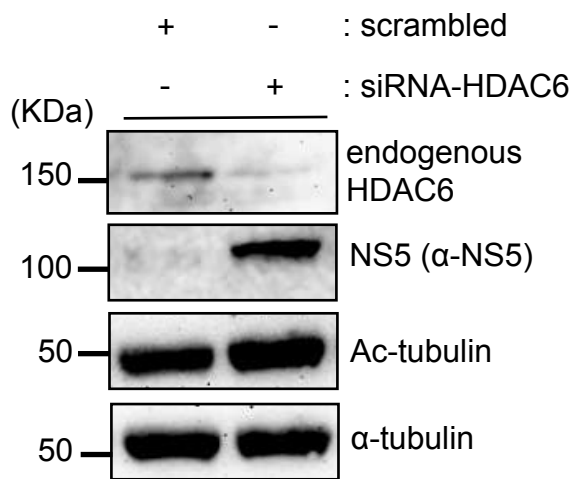

**Replicate 4 as figure format**

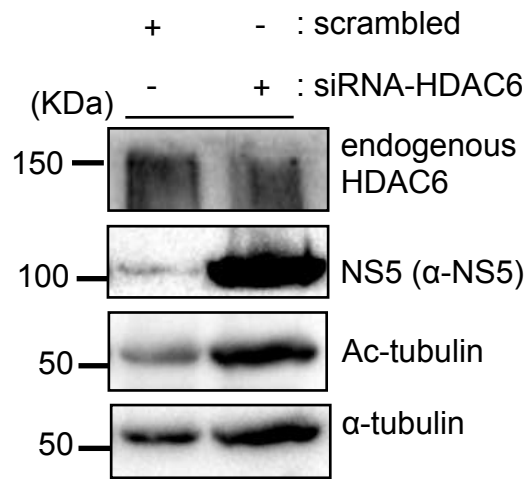

**Figure S4D.** Replicate 1 HDAC6 complete gel

Western-blot associated with Figure 4D  
Pérez-Yanes, S., et al.

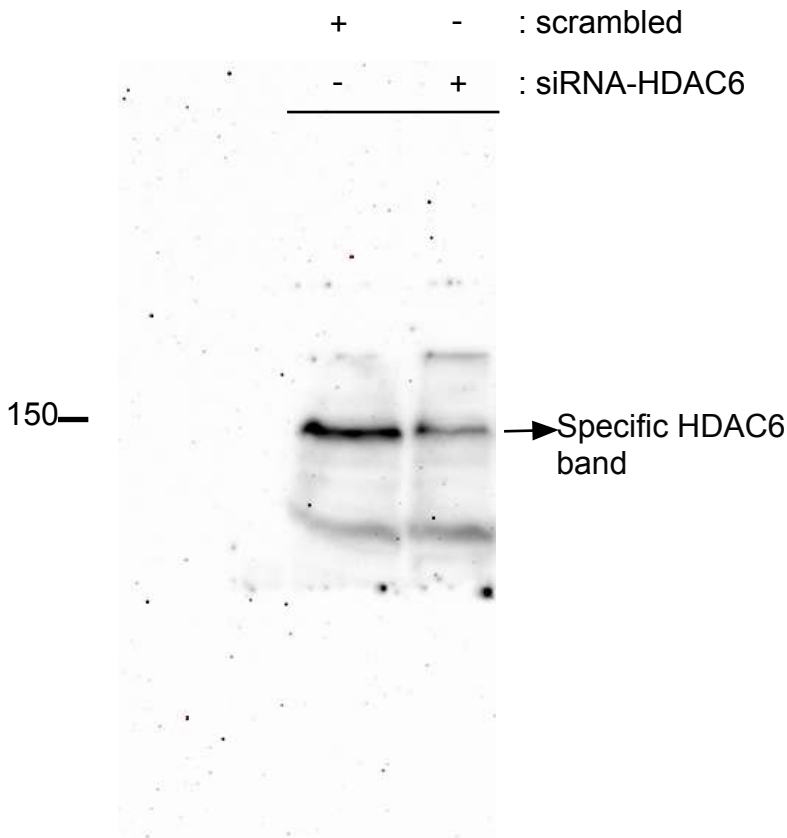

**Figure S4D.** Replicate 1 myc complete gel

Western-blot associated with Figure 4D  
Pérez-Yanes, S., et al.

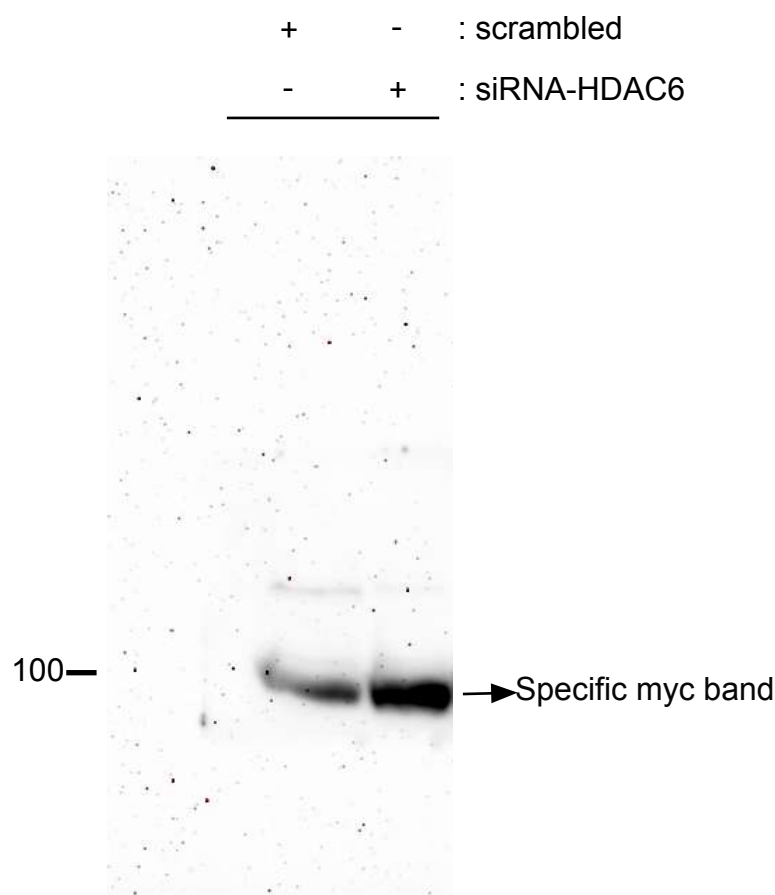

**Figure S4D.** Replicate 1 Total  $\alpha$ -Tubulin complete gel

Western-blot associated with Figure 4D  
Pérez-Yanes, S., et al.

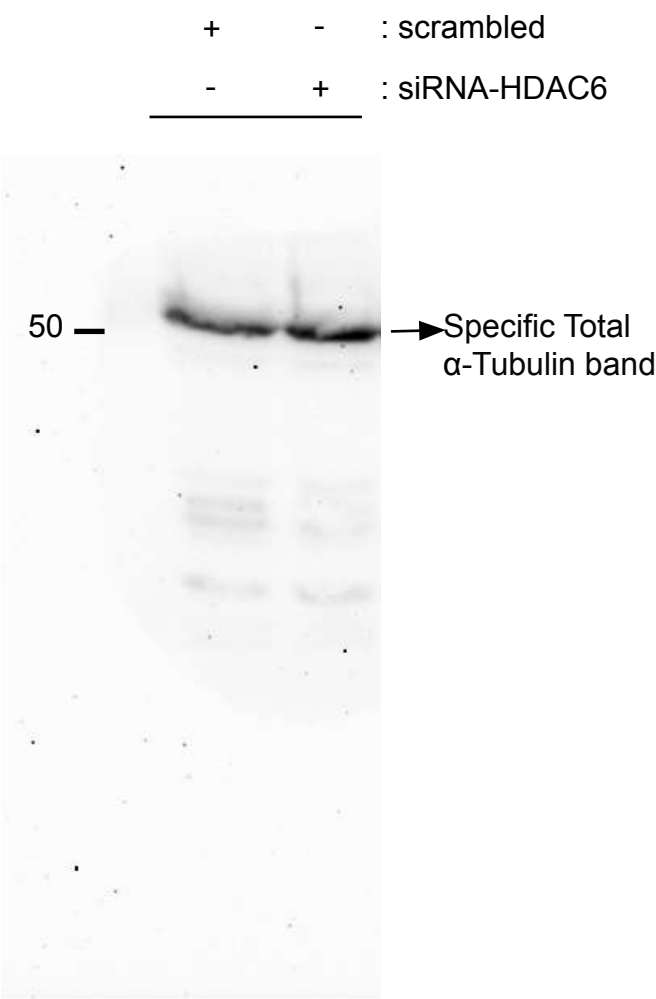

**Figure S4D.** *Replicate 1 Acetylated  $\alpha$ -Tubulin Western-blot associated with Figure 4D*  
*Pérez-Yanes, S., et al.*

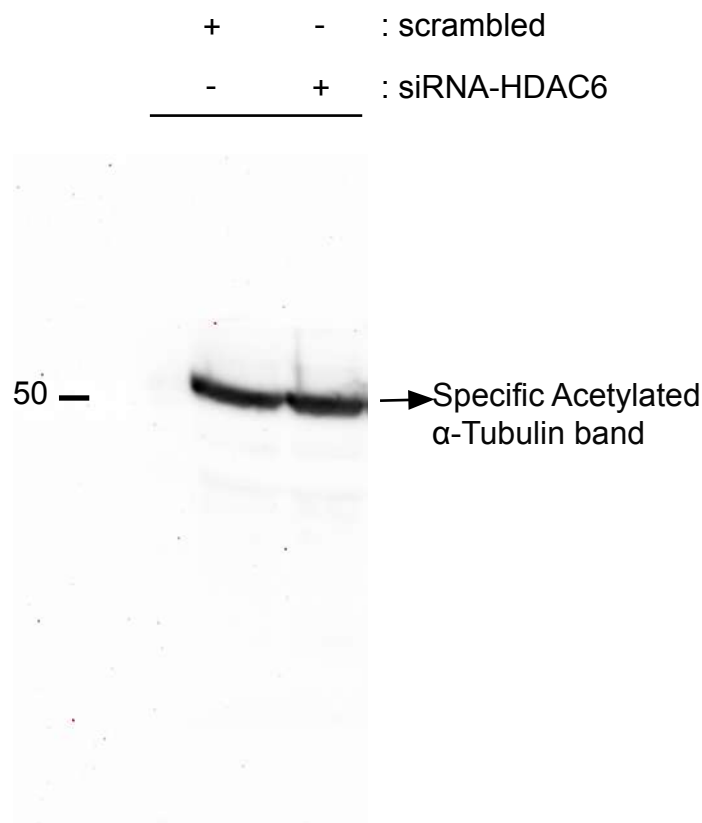

**Figure S4D.** Replicate 2 HDAC6 complete gel

Western-blot associated with Figure 4D  
Pérez-Yanes, S., et al.

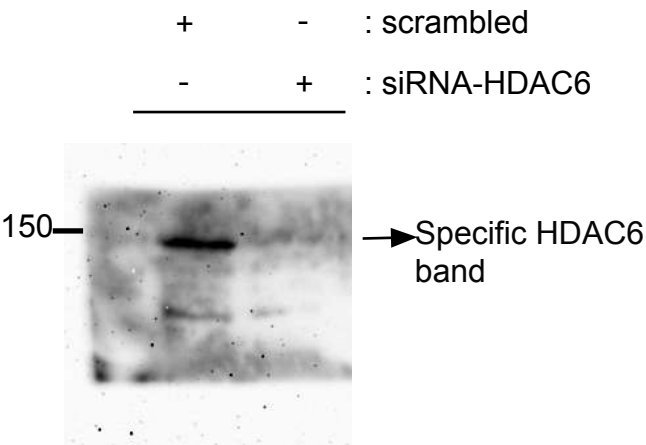



**Figure S4D.** Replicate 2 myc complete gel

Western-blot associated with Figure 4D  
Pérez-Yanes, S., et al.

|   |   |               |
|---|---|---------------|
| + | - | : scrambled   |
| - | + | : siRNA-HDAC6 |

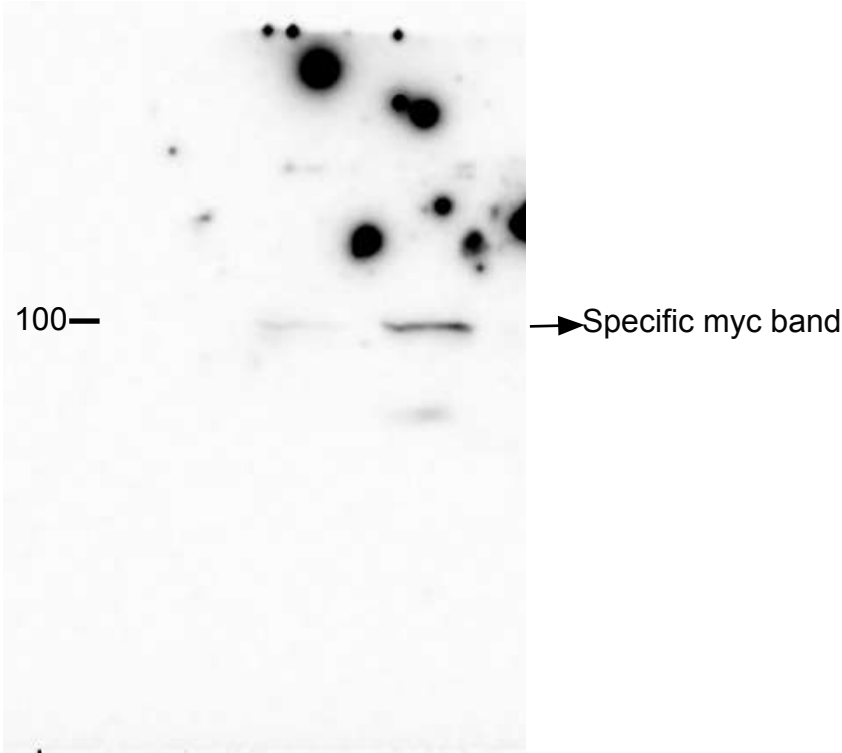

**Figure S4D.** Replicate 2 Total  $\alpha$ -Tubulin complete gel

Western-blot associated with Figure 4D  
Pérez-Yanes, S., et al.

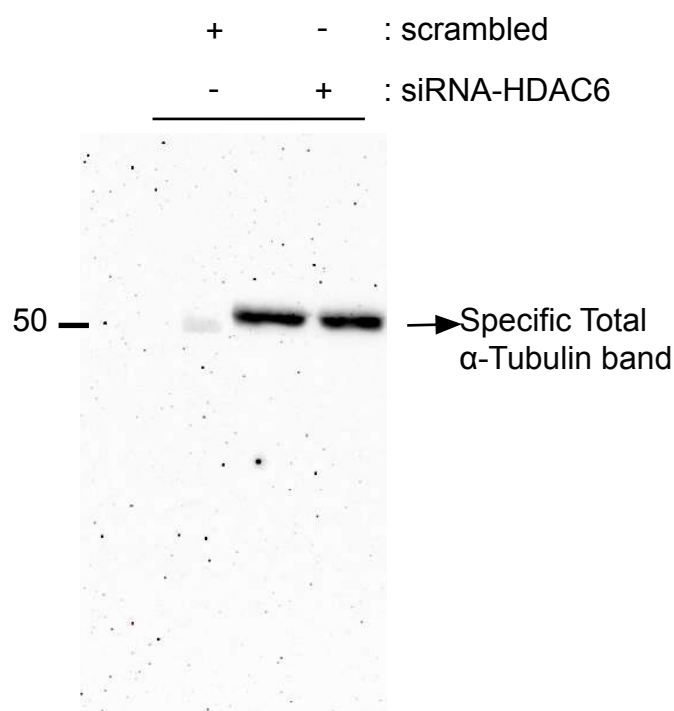

**Figure S4D.** *Replicate 2 Acetylated  $\alpha$ -Tubulin complete gel*

*Western-blot associated with Figure 4D*  
*Pérez-Yanes, S., et al.*

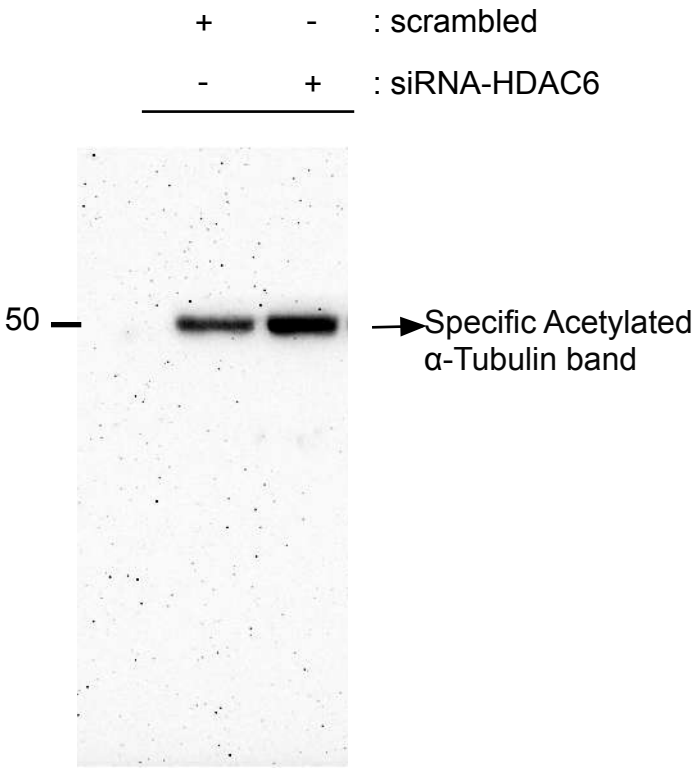

**Figure S4D.** Replicate 3 HDAC6 complete gel

Western-blot associated with Figure 4D  
Pérez-Yanes, S., et al.

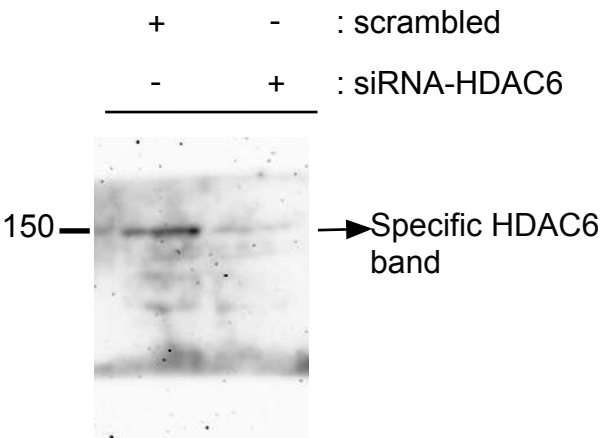

**Figure S4D.** Replicate 3 myc complete gel

Western-blot associated with Figure 4D  
Pérez-Yanes, S., et al.

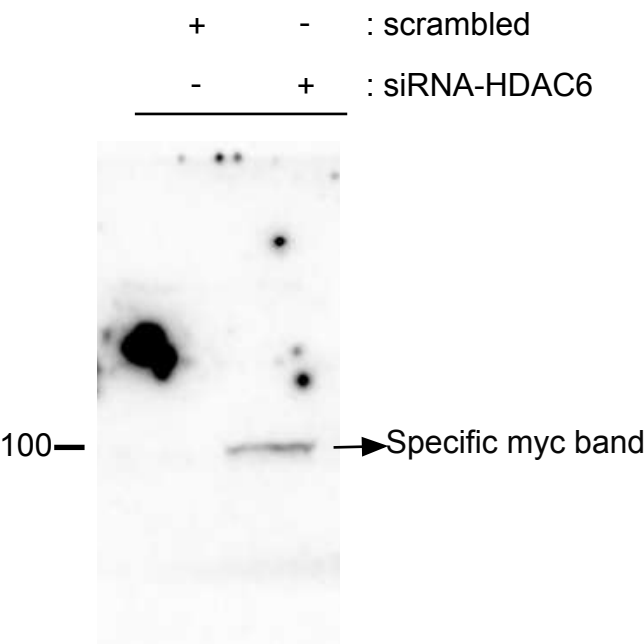

**Figure S4D.** Replicate 3 Total  $\alpha$ -Tubulin complete gel

Western-blot associated with Figure 4D  
Pérez-Yanes, S., et al.

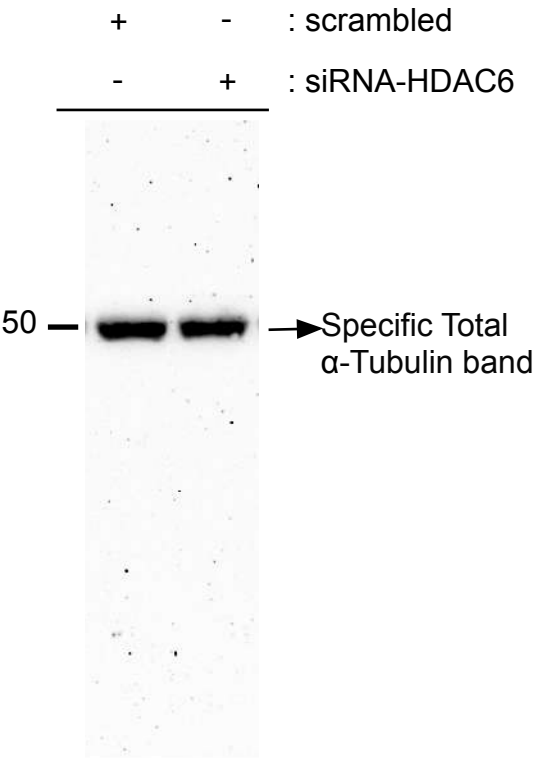

**Figure S4D.** *Replicate 3 Acetylated  $\alpha$ -Tubulin complete gel*

*Western-blot associated with  
Figure 4D  
Pérez-Yanes, S., et al.*

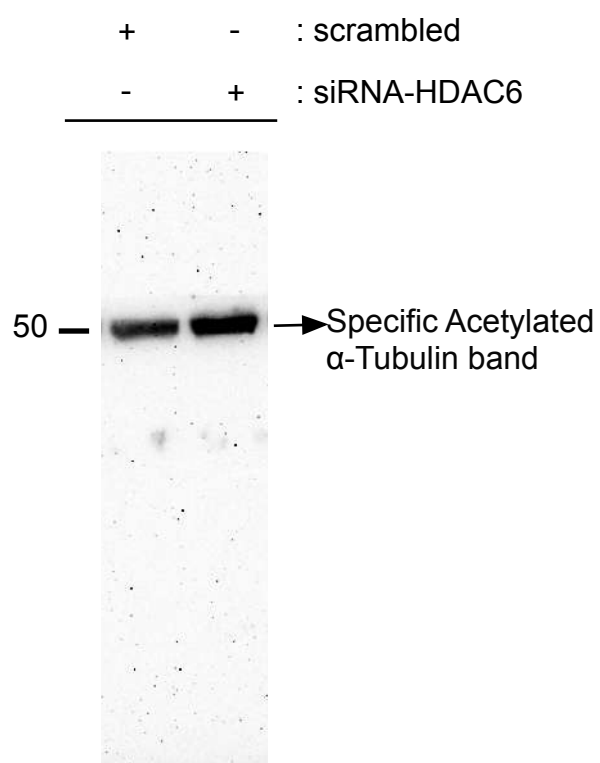

**Figure S4D.** Replicate 4 HDAC6 complete gel

Western-blot associated with  
Figure 4D  
Pérez-Yanes, S., et al.

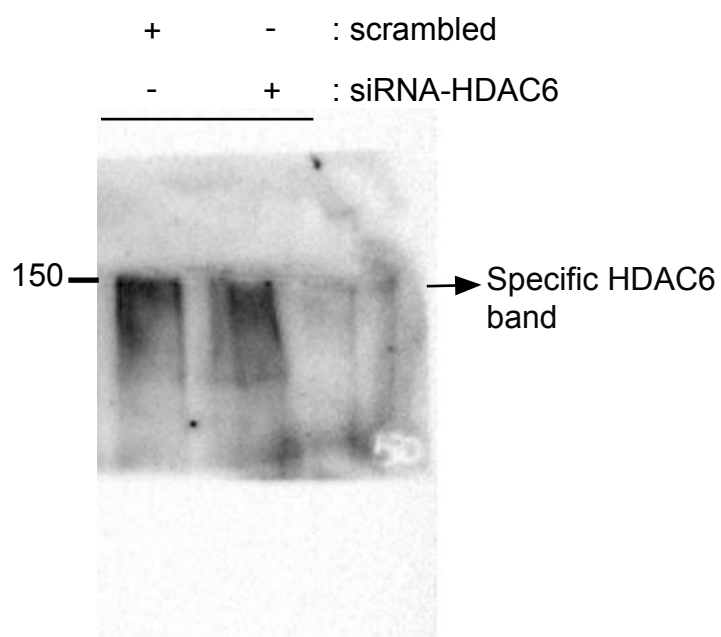



**Figure S4D.** Replicate 4 myc complete gel

Western-blot associated with Figure 4D  
Pérez-Yanes, S., et al.

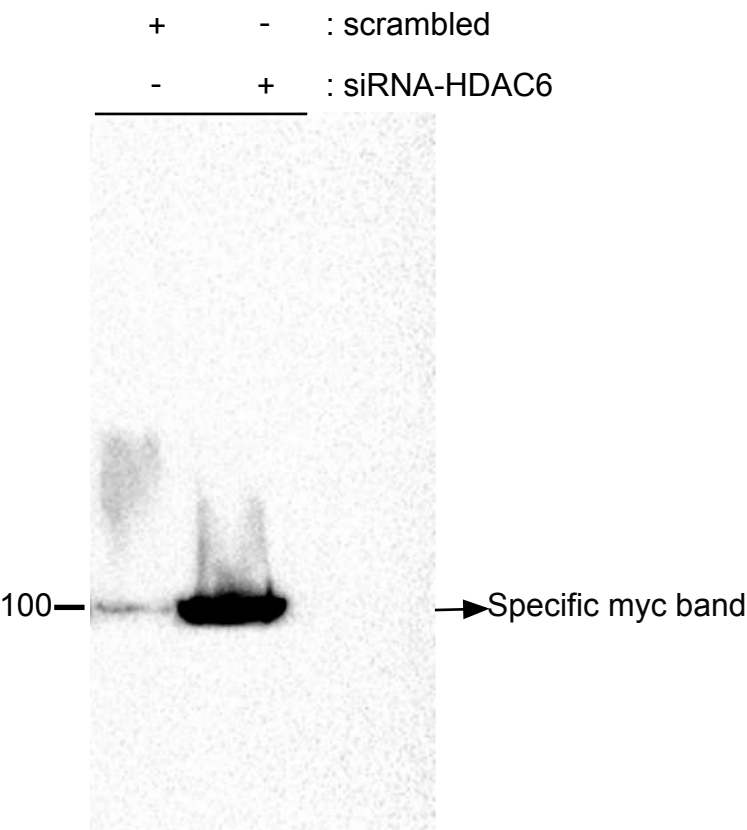

**Figure S4D.** Replicate 4 Total  $\alpha$ -Tubulin complete gel

Western-blot associated with Figure 4D  
Pérez-Yanes, S., et al.

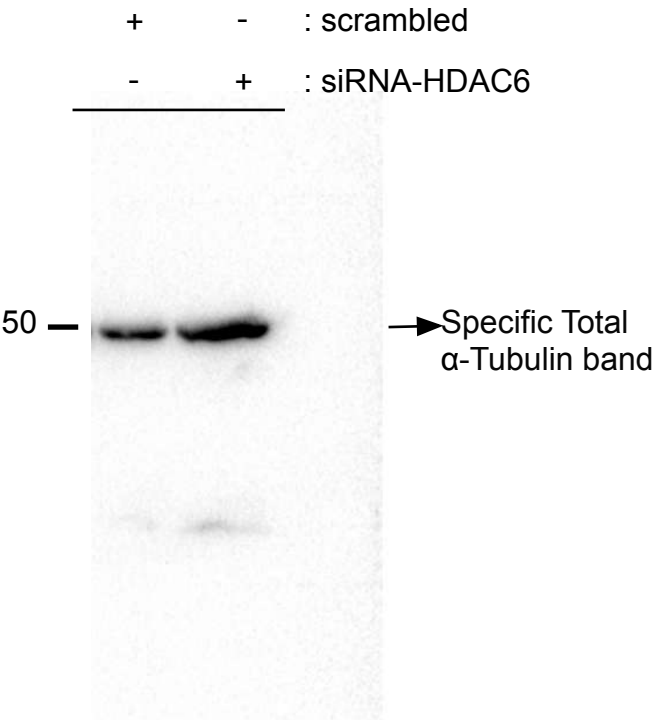

**Figure S4D.** Replicate 4 Acetylated  $\alpha$ -Tubulin complete gel

Western-blot associated with Figure 4D  
Pérez-Yanes, S., et al.

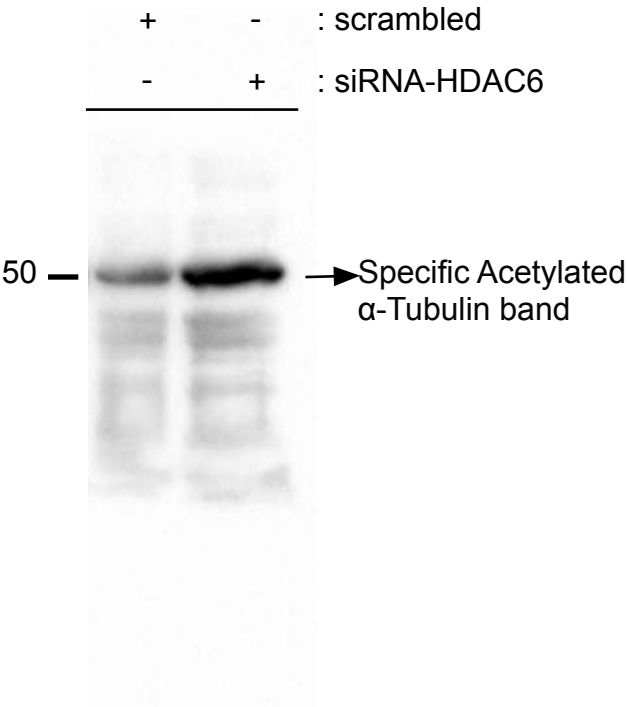

**Figura S5B.** Western-blot replicates associated with Figure 5B.

*Replicate 1 as figure format*

*Replicate 2 as figure format*

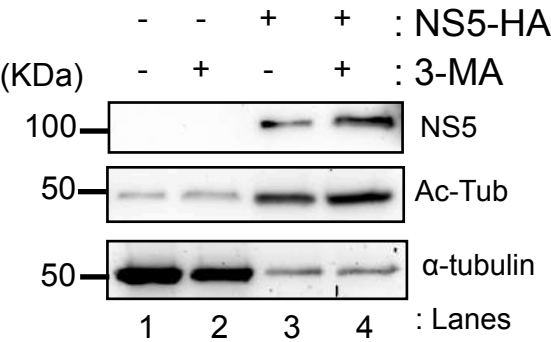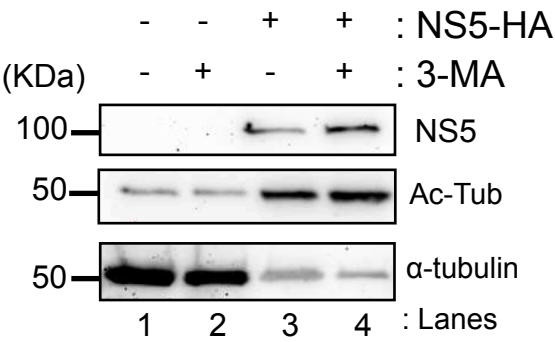

**Figure S5B.** Replicate 1 NS5 complete gel

Western-blot associated with  
Figure 5B  
Pérez-Yanes, S., et al.

|        |   |   |   |   |
|--------|---|---|---|---|
| NS5-HA | - | - | + | + |
| 3-MA   | - | + | - | + |

---

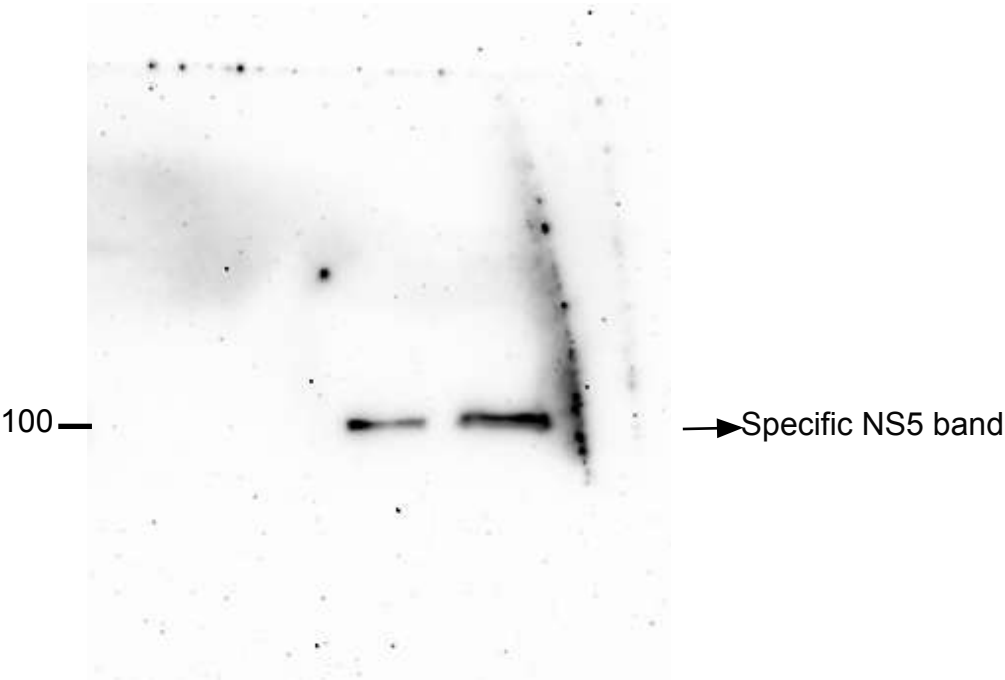

**Figure S5B.** Replicate 1 Total  $\alpha$ -Tubulin complete gel

Western-blot associated with Figure 5B  
Pérez-Yanes, S., et al.

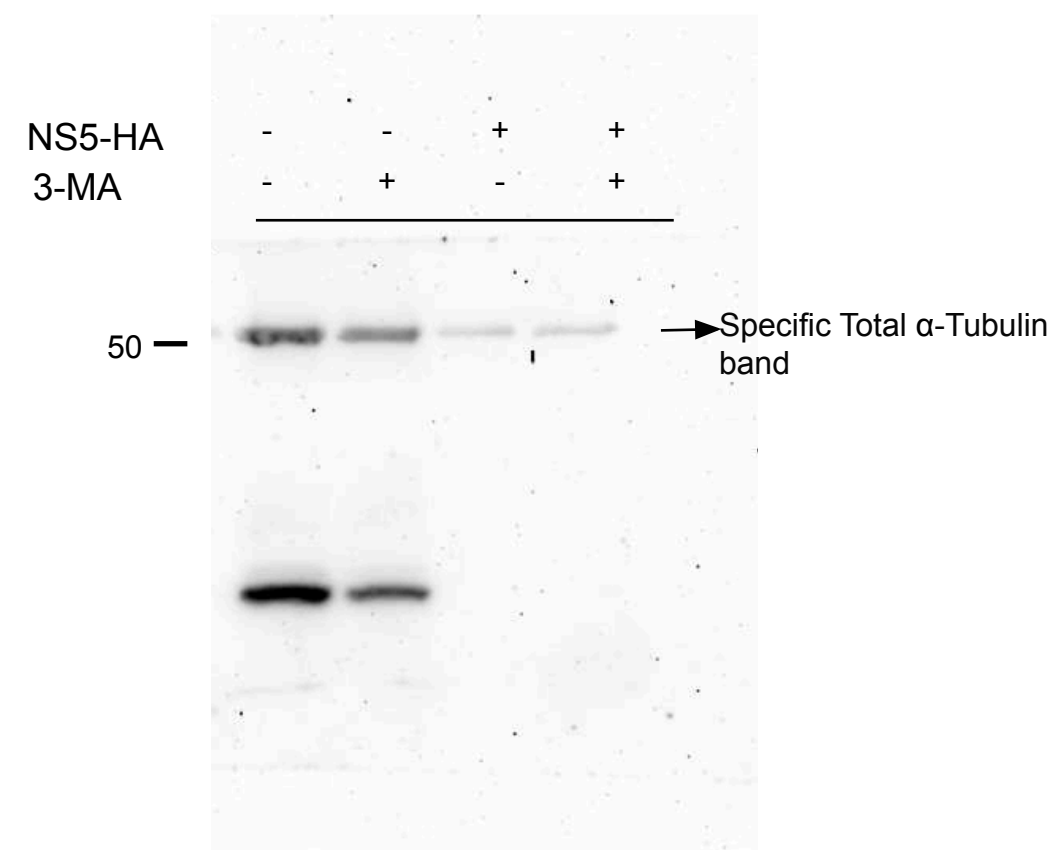

**Figure S5B.** Replicate 1 Acetylated  $\alpha$ -Tubulin complete gel

Western-blot associated with  
Figure 5B  
Pérez-Yanes, S., et al.

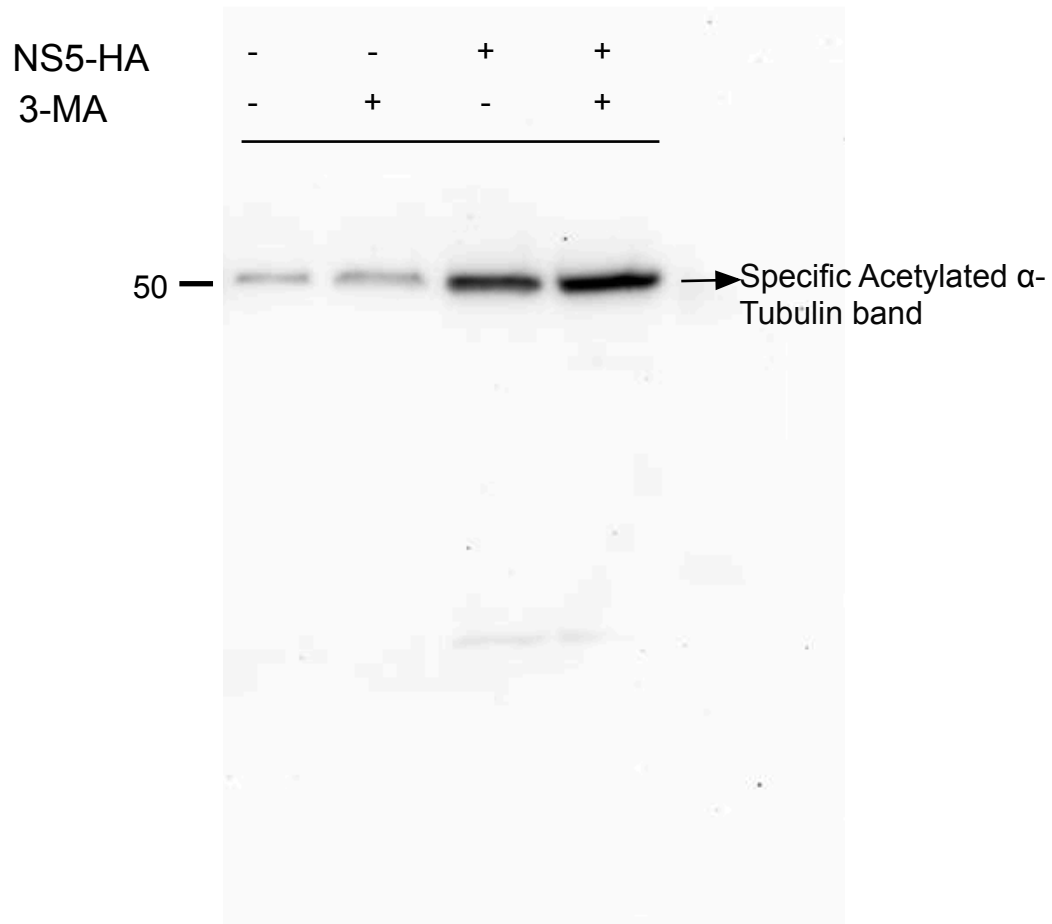

**Figure S5B.** Replicate 2 NS5 complete gel

Western-blot associated with  
Figure 5B  
Pérez-Yanes, S., et al.

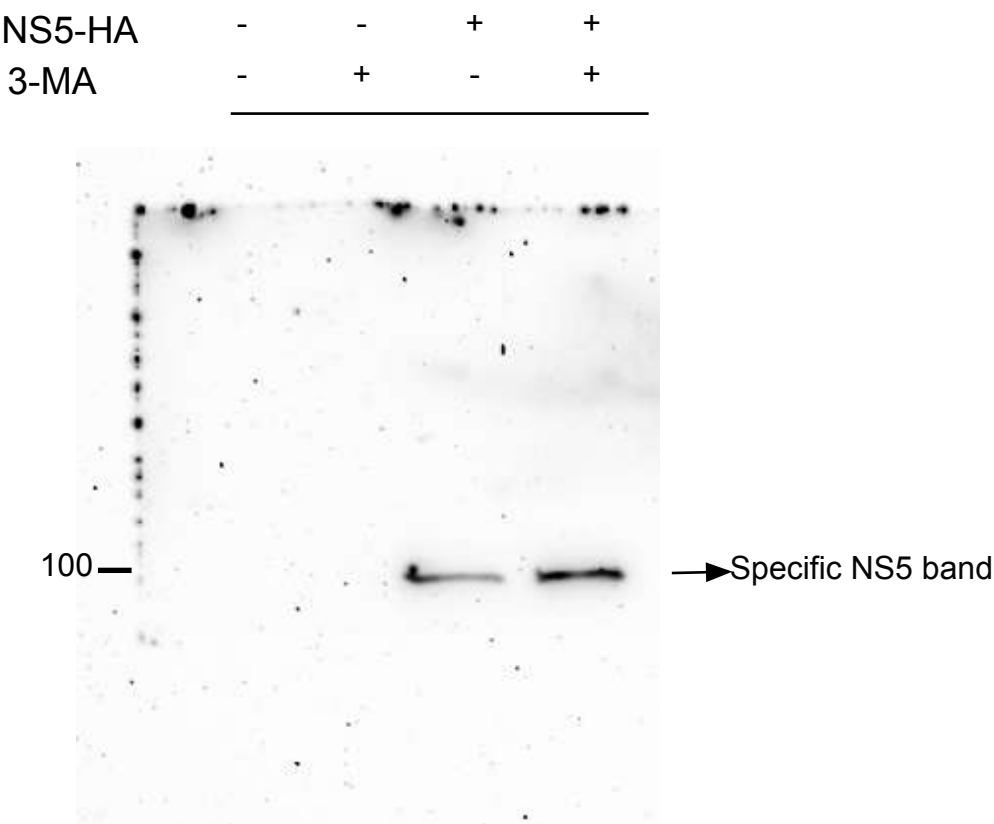



**Figure S5B.** Replicate 2 Total  $\alpha$ -Tubulin complete gel

Western-blot associated with Figure 5B  
Pérez-Yanes, S., et al.

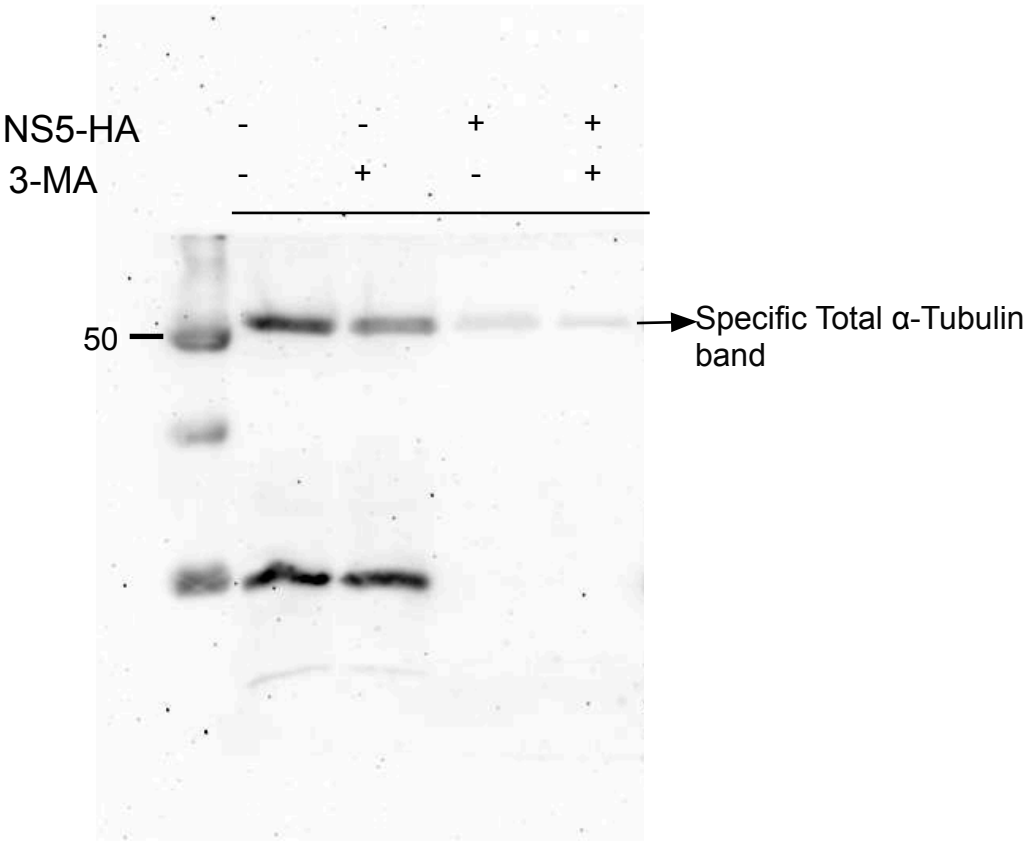

**Figure S5B.** Replicate 2 Acetylated  $\alpha$ -Tubulin complete gel

Western-blot associated with  
Figure 5B  
Pérez-Yanes, S., et al.

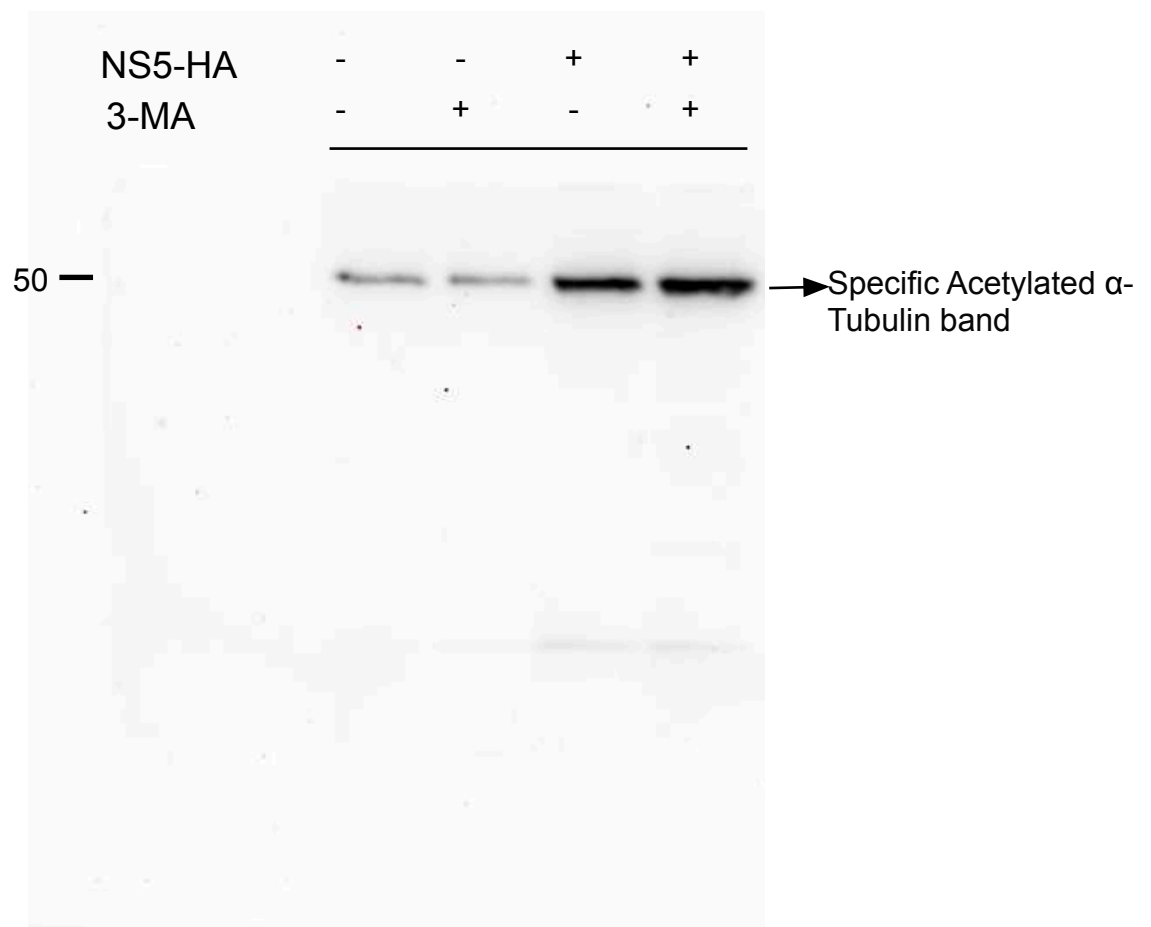

Supplement: s1 [file s1]
